# Supplementary material for: Repressor element 1-silencing transcription factor deficiency yields profound hearing loss through Kv7.4 channel upsurge in auditory neurons and hair cells
Source: eLife journal article supplement (doi:10.7554/elife.76754), 2022-09-20
Supplement: fig1-data1 [file Fig.1 F.xlsx]

## Sheet: Fig.1 F
						Figure 1. REST expression in the inner ear is essential for hearing
						E, F, ABR thresholds, and click values were measured in WT, Rest +/cKO mice, and Rest cKO mice at 1-2 months old.
	Click threshold(dB)
	WT	Rest +/cKO	Rest cKO
	45	20	25
	25	25	25
	30	35	55
	25	30	30
	20	25	40
	25	30	25
	25	35	45
			25
			30
			30
			25
			35
			40
mean	27.8571	28.5714	33.0769
SD	8.09174	5.56349	9.47331
