# Supplementary material for: Repressor element 1-silencing transcription factor deficiency yields profound hearing loss through Kv7.4 channel upsurge in auditory neurons and hair cells
Source: eLife journal article supplement (doi:10.7554/elife.76754), 2022-09-20
Supplement: fig1-data1 [file Fig.1 I.xlsx]

## Sheet: Fig.1 I
										Figure 1. REST expression in the inner ear is essential for hearing
										I, J, ABR threshold statistics of WT and Rest cKO mice at 1-month (I) and 3-months (J) of age in response to pure tone stimuli (8–32 kHz).
WT 1M
Number	ABR threshold(dB)
	8k	12k	16k	20k	24k	28k	32k
1	40	35	45	45	50	55	55
2	45	40	40	45	50	50	55
3	35	40	40	45	50	50	50
4	35	45	35	45	45	50	60
5	45	40	35	40	50	55	55
6	45	45	45	45	50	50	55
7	40	35	35	40	45	55	55
8	40	35	45	55	60	60	60
Rest cKO 1M
Number	ABR threshold(dB)
	8k	12k	16k	20k	24k	28k	32k
1	60	50	60	70	60	75	70
2	50	45	50	55	65	65	75
3	50	40	50	55	60	65	65
4	50	45	55	60	65	70	75
5	40	45	45	50	60	55	60
6	55	45	55	55	60	65	65
7	60	45	60	65	65	60	65
