# Supplementary material for: Repressor element 1-silencing transcription factor deficiency yields profound hearing loss through Kv7.4 channel upsurge in auditory neurons and hair cells
Source: eLife journal article supplement (doi:10.7554/elife.76754), 2022-09-20
Supplement: fig1-data1 [file Fig.1 J.xlsx]

## Sheet: Fig.1 J
											Figure 1. REST expression in the inner ear is essential for hearing
											I, J, ABR threshold statistics of WT and Rest cKO mice at 1-month (I) and 3-months (J) of age in response to pure tone stimuli (8–32 kHz).
WT 3M
Number	ABR threshold(dB)
	8k	12k	16k	20k	24k	28k	32k
1	45	50	55	60	55	60	60
2	40	45	50	50	45	50	55
3	40	50	50	45	50	45	50
4	40	45	45	45	55	55	60
5	50	40	35	45	40	45	50
6	40	40	45	50	40	35	50
7	45	40	45	50	40	45	50
8	55	40	55	60	55	55	55
Rest cKO 3M
Number	ABR threshold(dB)
	8k	12k	16k	20k	24k	28k	32k
1	90	65	85	＞90	＞90	＞90	＞90
2	85	60	90	90	＞90	＞90	＞90
3	55	55	70	80	＞90	＞90	＞90
4	75	70	80	85	＞90	＞90	＞90
5	65	50	90	＞90	＞90	＞90	＞90
6	90	90	90	90	＞90	＞90	＞90
7	55	55	85	85	＞90	＞90	＞90
