# Supplementary material for: Repressor element 1-silencing transcription factor deficiency yields profound hearing loss through Kv7.4 channel upsurge in auditory neurons and hair cells
Source: eLife journal article supplement (doi:10.7554/elife.76754), 2022-09-20
Supplement: fig1-data1 [file Fig.1E.xlsx]

## Sheet: Fig.1 E
										Figure 1. REST expression in the inner ear is essential for hearing
										E, F, ABR thresholds, and click values were measured in WT, Rest +/cKO mice, and Rest cKO mice at 1-2 months old.
WT
Number	ABR threshold(dB)
	8k	12k	16k	20k	24k	28k	32k
1	50	40	50	60	60	60	70
2	45	40	55	55	60	60	55
3	50	35	50	55	60	65	65
4	50	40	50	55	55	65	65
5	45	45	45	60	55	65	65
6	45	40	40	55	60	65	70
7	45	45	40	55	60	65	70
Rest +/cKO
Number	ABR threshold(dB)
	8k	12k	16k	20k	24k	28k	32k
1	60	75	55	55	70	75	75
2	60	70	60	80	75	70	80
3	60	70	50	65	65	65	80
4	55	70	50	65	70	75	75
5	55	60	45	60	65	75	75
6	65	70	60	60	60	70	80
7	60	55	50	60	65	70	85
Rest cKO
Number	ABR threshold(dB)
	8k	12k	16k	20k	24k	28k	32k
1	70	60	65	75	65	75	85
2	60	65	65	75	70	75	80
3	55	65	70	70	75	75	75
4	60	65	65	75	65	70	80
5	60	70	60	75	70	75	80
6	75	60	65	70	75	75	75
7	55	70	70	75	75	80	80
8	50	65	65	75	65	80	85
9	60	65	60	75	75	75	90
10	65	65	60	75	75	70	75
11	55	60	65	65	80	75	80
12	60	65	70	70	75	80	85
13	60	60	65	70	70	70	85
14	55	55	60	70	70	80	85
