# Supplementary material for: Repressor element 1-silencing transcription factor deficiency yields profound hearing loss through Kv7.4 channel upsurge in auditory neurons and hair cells
Source: eLife journal article supplement (doi:10.7554/elife.76754), 2022-09-20
Supplement: fig1-figsupp1-data1 [file Figure 1 - Figure supplement 1.xlsx]

## Sheet: Figure 1 - Figure supplement 1B
	ABR click test threshold(dB)
	Rest +/cKO 1-2M	Rest +/cKO 3-4M
	20	60
	25	55
	35	45
	30	70
	25	80
	30	90
	35	55
		40
		40

## Sheet: Figure 1 - Figure supplement 1C
Rest +/cKO 1-2M
Number	ABR threshold(dB)
	8k	16k	24k	32k
1	55	55	55	90
2	55	50	60	85
3	60	50	55	60
4	50	50	60	65
5	65	45	55	60
Rest +/cKO 3-4M
Number	ABR threshold(dB)
	8k	16k	24k	32k
1	90	90	80	/
2	90	90	/	/
3	85	70	/	/
4	80	85	85	/
5	80	80	/	/
6	90	90	90	/
7	60	50	65	/
8	60	65	90	/
9	60	60	90	/
