# Supplementary material for: Repressor element 1-silencing transcription factor deficiency yields profound hearing loss through Kv7.4 channel upsurge in auditory neurons and hair cells
Source: eLife journal article supplement (doi:10.7554/elife.76754), 2022-09-20
Supplement: fig1-figsupp2-data1 [file Figure_1-figure_supplement_2.xlsx]

## Sheet: wave 1 latency
wave 1 latency(ms)-click																																			Figure 1-figure supplement 2
Stimulus level(dB)	WT 1M									Rest cKO 1M							WT 3M								Rest cKO 3M										Amplitudes and latencies of ABR waves Ⅰ and Ⅱ in 1-, and 3-month-old WT and Rest cKO mice
90	1.398	1.275	1.316	1.316	1.316	1.316	1.316	1.357		1.313	1.331	1.395	1.281	1.365	1.301		1.234	1.257	1.193	1.316	1.275	1.316	1.316		1.519	1.395	1.478	1.665	1.437	1.706	1.478
80	1.481	1.316	1.439	1.357	1.316	1.398	1.357	1.398		1.354	1.372	1.478	1.354	1.366	1.371		1.275	1.357	1.275	1.357	1.316	1.357	1.398		1.56	1.437	1.601	1.765	1.478	1.888	1.519
70	1.522	1.357	1.481	1.398	1.357	1.522	1.439	1.439		1.395	1.454	1.542	1.437	1.447	1.413		1.357	1.439	1.357	1.439	1.398	1.439	1.439		1.519	1.724	1.724	1.724	1.847	1.888	1.993
60	1.645	1.439	1.563	1.481	1.398	1.645	1.522	1.522		1.455	1.558	1.588	1.519	1.488	1.495		1.439	1.563	1.522	1.481	1.439	1.522	1.522		/	/	/	/	/	/	/
50	1.669	1.522	1.686	1.563	1.481	1.727	1.604	1.645		1.538	1.642	/	1.56	1.618	1.675		1.563	1.686	1.627	1.522	1.563	1.686	1.645		/	/	/	/	/	/	/
wave 1 latency(ms)-Tone 12k Hz
Stimulus level(dB)	WT 1M									Rest cKO 1M							WT 3M								Rest cKO 3M
90	1.357	1.275	1.275	1.316	1.275	1.275	1.234	1.316		1.765	1.724	1.781	1.847	1.67	1.806		1.234	1.316	1.234	1.233	1.234	1.357	1.275		2.481	2.504	2.627	2.709	2.586	2.586	2.668
80	1.398	1.357	1.357	1.357	1.316	1.357	1.316	1.357		1.806	1.765	1.832	1.929	1.711	1.834		1.275	1.357	1.316	1.275	1.275	1.398	1.357		2.563	/	2.732	/	/	/	/
70	1.439	1.398	1.439	1.398	1.357	1.481	1.398	1.439		1.888	1.929	1.914	2.011	1.763	1.934		1.357	1.522	1.404	1.357	1.398	1.481	1.398		2.827	/	/	/	/	/	/
60	1.522	1.481	1.522	1.522	1.398	1.522	1.481	1.522		2.011	2.093	2.157	2.022	1.891	2.081		1.481	1.563	1.439	1.439	1.439	1.563	1.481		/	/	/	/	/	/	/
50	1.604	1.604	1.645	1.645	1.481	1.604	1.522	1.604		2.134	2.257	/	2.052	2.004	2.181		1.604	1.604	1.645	1.481	1.563	1.645	1.563		/	/	/	/	/	/	/

## Sheet: wave 1 amplitude
wave 1 Amplitude(nV)-click
Stimulus level(dB)	WT 1M									Rest cKO 1M							WT 3M								Rest cKO 3M
90	5724.03	4323.35	4381.39	3501.37	4748.26	3307.93	3733.24	4879.68		4360.63	5606.31	3326.57	3365.3	3024.62	3416.32		3849.09	4500.88	4564.11	4203.63	5709.94	4444.41	4922.61		2507.3	2683.41	2379.39	1279.65	2508.87	1847.53	1979.39
80	4624.84	4067.29	4455.84	3257.98	4286.18	3118.69	3462.44	4577.04		3478.53	4278.08	2484.76	2806.91	2754.83	3122.26		3754.8	3874.2	3511.86	3593.43	4695.88	3535.49	4887.85		1022.86	1364.22	1323.06	1070.67	1487.52	1023.8	964.468
70	3817.61	3919.87	4134.87	2994.29	3972.43	2968.07	3131.96	3988		2903.46	3324.35	1854.46	2665.47	2022.63	2978.58		3418.79	3053.13	3360.02	3120.26	3988.09	2762.87	4363.63		878.411	887.863	672.158	853.113	583.328	1055.98	771.34
60	3350.45	2680.47	3452.41	2553.8	2910.54	2930.75	2168.81	2886.6		2595.87	3170.06	1115.97	2174.92	1732.33	2037.8		2732.59	2955.16	2814.88	2655.7	2841.88	2481.16	3104.22		/	/	/	/	/	/	/
50	2841.99	1467.51	2357.09	2010.17	2103.92	2304.89	1180.75	1711.88		1436.03	2204.96	/	1583.93	1040.99	1647.89		2105.07	1952.14	2339.02	2087.64	2306.63	1913.53	1943.09		/	/	/	/	/	/	/
wave 1 Amplitude(nV)-Tone 12k Hz
Stimulus level(dB)	WT 1M									Rest cKO 1M							WT 3M								Rest cKO 3M
90	3627.7	3376.51	3596.92	2662.63	3992.18	3794.65	3218.28	3178.39		1783.96	2054.65	1894.34	2193.06	2028.24	1961.64		3149.41	3071.3	2907.29	2691.25	3036.71	3191.17	3151.81		1026.09	902.195	990.221	862.582	711.069	1037.32	963.242
80	3043.22	2988.13	2872.56	2608.93	3639.89	3060.33	2901.36	3248.5		1435.84	1642.31	1585.01	1799.24	1802.09	1712.77		2968.89	2748.22	2736.78	2315.41	2566.76	2800.45	3064.57		845.346	/	812.981	/	/	/	/
70	2792.2	2284.89	2684.83	2340.24	2980.94	2182.45	2143.46	2884.83		1209.11	1073.04	1246.91	1387.43	1498.18	1254.09		2170.56	2045.07	2531.37	2187.93	2531.39	2366.73	2112.37		533.59	/	/	/	/	/	/
60	2502.72	1827.64	2186.47	2106.24	2278.58	2099.62	1773.87	2091.01		971.06	942.496	997.119	1059.68	1114.65	1055.28		1582.91	1822.73	1996.37	1968.57	1551.41	1956.46	1575.49		/	/	/	/	/	/	/
50	1130.57	1168.95	1680.82	1193.07	1482.96	1617.96	1202.65	1321.91		832.498	811.286	/	980.443	1048.73	982.77		1165.06	1248.32	1449.77	1535.57	1243.9	1377.96	1107.55		/	/	/	/	/	/	/

## Sheet: wave 2 latency
wave 2 latency(ms)-click
Stimulus level(dB)	WT 1M									Rest cKO 1M							WT 3M								Rest cKO 3M
90	2.591	2.344	2.427	2.385	2.303	2.468	2.139	2.385		2.216	2.375	2.216	2.381	2.545	2.293		2.262	2.344	2.221	2.303	2.262	2.468	2.221		2.216	2.252	2.298	2.586	2.275	2.545	2.34
80	2.509	2.344	2.385	2.427	2.344	2.509	2.18	2.385		2.318	2.393	2.257	2.34	2.547	2.334		2.303	2.344	2.262	2.262	2.303	2.509	2.221		2.298	2.351	2.34	2.627	2.357	2.75	2.422
70	2.509	2.468	2.385	2.427	2.385	2.385	2.221	2.427		2.406	2.435	2.422	2.381	2.567	2.475		2.344	2.303	2.262	2.262	2.344	2.55	2.303		2.504	2.504	2.75	2.463	2.586	2.791	2.791
60	2.55	2.509	2.468	2.509	2.427	2.509	2.344	2.468		2.498	2.492	2.591	2.44	2.607	2.516		2.344	2.385	2.303	2.303	2.427	2.468	2.385		/	/	/	/	/	/	/
50	2.614	2.427	2.591	2.509	2.509	2.602	2.509	2.55		2.54	2.522	/	2.563	2.619	2.557		2.427	2.509	2.468	2.468	2.427	2.532	2.55		/	/	/	/	/	/	/
wave 2 latency(ms)-Tone 12k Hz
Stimulus level(dB)	WT 1M									Rest cKO 1M							WT 3M								Rest cKO 3M
90	2.468	2.098	2.098	2.139	2.221	2.262	2.015	2.262		2.709	2.709	2.612	2.742	2.832	2.648		2.015	2.139	2.015	1.933	2.015	2.221	2.056		3.735	3.981	3.735	4.063	4.186	3.858	3.94
80	2.427	2.221	2.18	2.18	2.303	2.303	2.139	2.344		2.873	2.75	2.722	2.766	2.955	2.708		2.139	2.262	2.221	2.015	2.015	2.303	2.18		3.899	/	3.858	/	/	/	/
70	2.385	2.344	2.303	2.262	2.18	2.344	2.18	2.303		2.996	2.914	2.851	2.853	3.019	2.825		2.262	2.303	2.262	2.139	2.139	2.385	2.262		4.145	/	/	/	/	/	/
60	2.468	2.385	2.427	2.385	2.262	2.385	2.262	2.427		3.019	3.119	3.072	2.963	3.176	2.953		2.303	2.385	2.303	2.262	2.262	2.509	2.303		/	/	/	/	/	/	/
50	2.55	2.427	2.509	2.468	2.344	2.509	2.385	2.509		3.066	3.171	/	3.186	3.284	3.071		2.427	2.509	2.385	2.344	2.385	2.591	2.427		/	/	/	/	/	/	/

## Sheet: wave 2 amplitude
wave 2 Amplitude(nV)-click
Stimulus level(dB)	WT 1M									Rest cKO 1M							WT 3M								Rest cKO 3M
90	3253.15	2770.1	2161.16	2522.52	2123.18	2819.5	2091.1	2818.82		2864.17	2741.39	2676.83	2886.22	2924.39	2842.43		2740.42	3053.13	2645.17	2478.42	2436.14	2273.93	2988.64		1957.44	1820.07	1783.45	1710.65	1476.71	1418.63	1774.23
80	2830.42	2658.21	2044.84	2398.61	2027.69	2637.68	1979.74	2156.94		2119.89	2602.03	2146.95	2181.58	2411.61	2102.61		2037.07	2253.95	2138.4	2251.88	2169.53	2070.39	2753.5		1316.32	16358.6	1353.12	958.514	1047.77	937.028	1029.68
70	2328.52	2342.39	2041.2	2209.71	1145.04	2437.34	1969.06	1960.24		1594.25	2137.63	1351.53	1907.42	2098.66	1831.64		1998.02	2120.76	2017.82	2052.91	1749.48	1994.78	2459.15		1077.29	757.169	1039.25	912.073	1034.84	867.609	941.711
60	1942.23	1839.68	1562.55	1968.28	1116.3	2175.1	1747.02	1895		1278.54	1933.85	1083.39	1353.33	1744.35	1611.27		1818.5	1913.12	1988.08	1919.71	1334.52	1882.41	1704.27		/	/	/	/	/	/	/
50	1438.78	1712.37	1178.6	1302.94	1022.17	1855.81	1598.36	1295.38		1166.1	1597.2	/	1180.84	1141.65	1552.6		1556.75	1724.59	1638.4	1632.55	1198.64	1743.14	1331.05		/	/	/	/	/	/	/
wave 1 Amplitude(nV)-Tone 16k Hz
Stimulus level(dB)	WT 1M									Rest cKO 1M							WT 3M								Rest cKO 3M
90	1824.17	1962.04	1446.21	1513.42	1609.98	2014.39	1796.38	1702.18		1601.81	1748.17	1537.52	1586.85	1628.24	1776.7		1814.97	1705.45	1763.46	1771.13	1970.51	1798.48	1823.57		958.437	1087.13	869.884	725.549	678.728	969.65	862.928
80	1623.94	1819.02	1441.09	1467.31	1474.47	1799.15	1576.65	1415.42		1440.68	1549.33	1284.21	1242.93	1398.18	1464.41		1460.29	1492.05	1700.28	1621.53	1661.7	1623.1	1689.53		843.293	/	765.312	/	/	/	/
70	1530.18	1607.43	1416.87	1385.81	1437.56	1584.58	1487.52	1370.16		1306.05	1207.03	1114.83	1153.03	1202.09	1223.2		1391.21	1250.36	1691.63	1528.68	1466.7	1528.68	1332.97		/	/	/	/	/	/	/
60	1381.62	1517.55	1288.72	1339.53	1170.06	1326.83	1442.64	1274.06		962.837	1043.58	917.112	907.132	1014.65	1022.92		1261.43	1189.07	1558.74	1480.82	1282.87	1360.9	1208.18		/	/	/	/	/	/	/
50	1363.54	1227.65	1242.7	1116.01	1168.53	1168.94	1367.82	1171.59		834.675	951.612	/	811.581	948.734	1013.53		1164.11	1090.86	1488.16	1417.96	1180.28	1280.67	1122.01		/	/	/	/	/	/	/
