# Supplementary material for: Repressor element 1-silencing transcription factor deficiency yields profound hearing loss through Kv7.4 channel upsurge in auditory neurons and hair cells
Source: eLife journal article supplement (doi:10.7554/elife.76754), 2022-09-20
Supplement: fig3-data1 [file Figure_3_source_data.xlsx]

## Sheet: Figure 3A source silent
							Figure 3. Reduced excitability of SGNs in Rest cKO mice
Time(ms)	Voltage(mV)
0	-30.5176
0.05	-30.8228
0.1	-30.5176
0.15	-30.5176
0.2	-30.5176
0.25	-31.1279
0.3	-30.8228
0.35	-30.5176
0.4	-30.5176
0.45	-30.8228
0.5	-31.1279
0.55	-30.5176
0.6	-31.1279
0.65	-30.8228
0.7	-31.1279
0.75	-30.8228
0.8	-31.1279
0.85	-30.8228
0.9	-30.8228
0.95	-30.8228
1	-30.8228
1.05	-30.5176
1.1	-30.8228
1.15	-30.5176
1.2	-30.8228
1.25	-30.5176
1.3	-30.5176
1.35	-29.9072
1.4	-30.2124
1.45	-30.5176
1.5	-30.5176
1.55	-30.5176
1.6	-30.5176
1.65	-30.8228
1.7	-30.8228
1.75	-31.1279
1.8	-30.8228
1.85	-30.8228
1.9	-31.1279
1.95	-31.1279
2	-31.7383
2.05	-31.4331
2.1	-31.1279
2.15	-30.8228
2.2	-30.8228
2.25	-30.8228
2.3	-30.8228
2.35	-31.1279
2.4	-30.2124
2.45	-31.1279
2.5	-30.5176
2.55	-30.8228
2.6	-30.5176
2.65	-30.5176
2.7	-30.2124
2.75	-30.2124
2.8	-30.5176
2.85	-30.5176
2.9	-30.8228
2.95	-30.5176
3	-30.8228
3.05	-30.8228
3.1	-30.8228
3.15	-30.8228
3.2	-31.1279
3.25	-31.4331
3.3	-31.1279
3.35	-31.1279
3.4	-30.8228
3.45	-31.1279
3.5	-30.8228
3.55	-31.1279
3.6	-30.8228
3.65	-31.1279
3.7	-30.8228
3.75	-31.1279
3.8	-31.1279
3.85	-30.8228
3.9	-30.8228
3.95	-30.2124
4	-30.5176
4.05	-30.5176
4.1	-30.5176
4.15	-30.5176
4.2	-30.5176
4.25	-30.5176
4.3	-30.5176
4.35	-30.8228
4.4	-31.4331
4.45	-30.8228
4.5	-30.8228
4.55	-31.1279
4.6	-31.1279
4.65	-30.8228
4.7	-31.4331
4.75	-31.4331
4.8	-31.4331
4.85	-31.1279
4.9	-31.4331
4.95	-31.1279
5	-30.8228
5.05	-31.1279
5.1	-30.8228
5.15	-31.1279
5.2	-30.5176
5.25	-30.8228
5.3	-30.8228
5.35	-30.8228
5.4	-30.8228
5.45	-30.5176
5.5	-30.8228
5.55	-30.8228
5.6	-30.5176
5.65	-30.8228
5.7	-30.8228
5.75	-30.5176
5.8	-31.1279
5.85	-30.8228
5.9	-31.1279
5.95	-31.1279
6	-30.5176
6.05	-31.1279
6.1	-31.1279
6.15	-31.1279
6.2	-31.1279
6.25	-31.4331
6.3	-31.1279
6.35	-31.1279
6.4	-30.8228
6.45	-30.8228
6.5	-30.8228
6.55	-30.8228
6.6	-30.5176
6.65	-30.8228
6.7	-30.5176
6.75	-30.5176
6.8	-31.1279
6.85	-31.4331
6.9	-30.8228
6.95	-30.8228
7	-30.8228
7.05	-31.4331
7.1	-31.1279
7.15	-31.4331
7.2	-31.7383
7.25	-31.4331
7.3	-31.1279
7.35	-31.1279
7.4	-31.1279
7.45	-30.8228
7.5	-31.1279
7.55	-31.4331
7.6	-31.1279
7.65	-30.8228
7.7	-30.8228
7.75	-30.8228
7.8	-31.1279
7.85	-31.1279
7.9	-30.8228
7.95	-30.5176
8	-31.4331
8.05	-30.8228
8.1	-30.8228
8.15	-31.1279
8.2	-31.1279
8.25	-30.8228
8.3	-30.8228
8.35	-31.4331
8.4	-31.4331
8.45	-31.4331
8.5	-30.8228
8.55	-31.4331
8.6	-31.1279
8.65	-31.1279
8.7	-30.8228
8.75	-30.8228
8.8	-30.8228
8.85	-30.5176
8.9	-30.8228
8.95	-30.8228
9	-30.8228
9.05	-31.4331
9.1	-31.1279
9.15	-31.4331
9.2	-31.1279
9.25	-31.1279
9.3	-30.8228
9.35	-31.1279
9.4	-31.1279
9.45	-31.1279
9.5	-31.1279
9.55	-31.4331
9.6	-31.1279
9.65	-30.8228
9.7	-30.5176
9.75	-31.1279
9.8	-30.8228
9.85	-31.1279
9.9	-31.1279
9.95	-30.8228
10	-30.8228
10.05	-30.8228
10.1	-31.1279
10.15	-30.8228
10.2	-31.4331
10.25	-30.8228
10.3	-31.1279
10.35	-31.1279
10.4	-31.7383
10.45	-30.8228
10.5	-30.8228
10.55	-31.4331
10.6	-30.5176
10.65	-30.8228
10.7	-31.1279
10.75	-30.8228
10.8	-30.5176
10.85	-30.8228
10.9	-30.5176
10.95	-30.5176
11	-31.4331
11.05	-30.2124
11.1	-30.8228
11.15	-31.1279
11.2	-30.5176
11.25	-30.5176
11.3	-30.8228
11.35	-31.4331
11.4	-30.5176
11.45	-30.5176
11.5	-31.1279
11.55	-31.1279
11.6	-31.1279
11.65	-31.1279
11.7	-30.8228
11.75	-31.1279
11.8	-30.5176
11.85	-30.8228
11.9	-30.8228
11.95	-30.5176
12	-30.8228
12.05	-30.5176
12.1	-30.8228
12.15	-30.8228
12.2	-30.8228
12.25	-30.5176
12.3	-30.8228
12.35	-31.4331
12.4	-30.8228
12.45	-30.8228
12.5	-30.8228
12.55	-31.1279
12.6	-31.1279
12.65	-30.5176
12.7	-30.8228
12.75	-30.8228
12.8	-30.5176
12.85	-30.2124
12.9	-30.5176
12.95	-30.2124
13	-30.2124
13.05	-30.5176
13.1	-30.2124
13.15	-30.2124
13.2	-30.5176
13.25	-30.8228
13.3	-30.8228
13.35	-31.1279
13.4	-30.8228
13.45	-30.8228
13.5	-30.8228
13.55	-30.8228
13.6	-30.8228
13.65	-30.5176
13.7	-30.8228
13.75	-30.8228
13.8	-30.5176
13.85	-30.5176
13.9	-30.8228
13.95	-30.2124
14	-30.8228
14.05	-30.8228
14.1	-30.2124
14.15	-30.2124
14.2	-30.2124
14.25	-30.2124
14.3	-30.2124
14.35	-30.5176
14.4	-30.5176
14.45	-30.5176
14.5	-30.8228
14.55	-30.5176
14.6	-31.1279
14.65	-30.8228
14.7	-30.8228
14.75	-31.4331
14.8	-31.1279
14.85	-31.1279
14.9	-30.8228
14.95	-31.1279
15	-30.8228
15.05	-30.5176
15.1	-30.8228
15.15	-30.2124
15.2	-30.2124
15.25	-30.2124
15.3	-29.9072
15.35	-30.2124
15.4	-29.6021
15.45	-30.2124
15.5	-30.8228
15.55	-30.5176
15.6	-30.5176
15.65	-30.8228
15.7	-30.8228
15.75	-31.1279
15.8	-31.1279
15.85	-30.8228
15.9	-30.8228
15.95	-30.8228
16	-30.8228
16.05	-30.8228
16.1	-30.8228
16.15	-30.5176
16.2	-30.2124
16.25	-30.2124
16.3	-30.2124
16.35	-30.2124
16.4	-29.9072
16.45	-30.2124
16.5	-30.2124
16.55	-30.2124
16.6	-30.5176
16.65	-30.5176
16.7	-30.8228
16.75	-30.8228
16.8	-30.8228
16.85	-30.8228
16.9	-31.1279
16.95	-31.1279
17	-31.4331
17.05	-30.8228
17.1	-31.1279
17.15	-30.8228
17.2	-30.8228
17.25	-30.5176
17.3	-30.5176
17.35	-30.8228
17.4	-30.5176
17.45	-30.8228
17.5	-30.2124
17.55	-30.5176
17.6	-30.5176
17.65	-30.5176
17.7	-30.5176
17.75	-30.5176
17.8	-30.2124
17.85	-30.8228
17.9	-30.5176
17.95	-30.8228
18	-31.4331
18.05	-30.8228
18.1	-31.1279
18.15	-30.8228
18.2	-31.1279
18.25	-31.1279
18.3	-30.8228
18.35	-30.8228
18.4	-30.5176
18.45	-30.8228
18.5	-30.2124
18.55	-30.5176
18.6	-30.5176
18.65	-30.8228
18.7	-30.8228
18.75	-30.8228
18.8	-31.1279
18.85	-30.8228
18.9	-30.8228
18.95	-30.8228
19	-30.8228
19.05	-30.8228
19.1	-30.5176
19.15	-30.8228
19.2	-31.1279
19.25	-30.8228
19.3	-30.8228
19.35	-30.8228
19.4	-31.1279
19.45	-31.4331
19.5	-30.8228
19.55	-30.5176
19.6	-30.8228
19.65	-30.8228
19.7	-30.5176
19.75	-31.1279
19.8	-31.4331
19.85	-30.8228
19.9	-31.1279
19.95	-30.8228
20	-31.1279
20.05	-31.1279
20.1	-31.1279
20.15	-31.1279
20.2	-30.5176
20.25	-30.5176
20.3	-30.8228
20.35	-30.8228
20.4	-30.8228
20.45	-30.5176
20.5	-31.1279
20.55	-30.8228
20.6	-30.5176
20.65	-31.1279
20.7	-30.8228
20.75	-31.1279
20.8	-30.8228
20.85	-31.1279
20.9	-30.8228
20.95	-31.1279
21	-31.4331
21.05	-30.8228
21.1	-31.1279
21.15	-30.8228
21.2	-30.8228
21.25	-30.8228
21.3	-31.1279
21.35	-30.5176
21.4	-30.5176
21.45	-30.5176
21.5	-30.8228
21.55	-30.8228
21.6	-30.8228
21.65	-30.5176
21.7	-30.8228
21.75	-30.8228
21.8	-31.1279
21.85	-31.1279
21.9	-30.8228
21.95	-31.1279
22	-31.1279
22.05	-31.7383
22.1	-31.4331
22.15	-31.4331
22.2	-31.4331
22.25	-31.4331
22.3	-31.4331
22.35	-30.8228
22.4	-31.4331
22.45	-31.1279
22.5	-30.8228
22.55	-30.8228
22.6	-30.2124
22.65	-30.5176
22.7	-30.2124
22.75	-30.8228
22.8	-30.5176
22.85	-30.5176
22.9	-30.8228
22.95	-30.8228
23	-30.8228
23.05	-31.1279
23.1	-31.1279
23.15	-31.4331
23.2	-31.7383
23.25	-31.7383
23.3	-31.1279
23.35	-30.8228
23.4	-31.4331
23.45	-31.4331
23.5	-31.1279
23.55	-31.1279
23.6	-31.1279
23.65	-30.8228
23.7	-30.8228
23.75	-30.8228
23.8	-30.5176
23.85	-30.5176
23.9	-30.8228
23.95	-30.5176
24	-30.5176
24.05	-30.8228
24.1	-30.8228
24.15	-30.8228
24.2	-31.1279
24.25	-30.8228
24.3	-31.1279
24.35	-31.4331
24.4	-31.1279
24.45	-31.4331
24.5	-31.4331
24.55	-31.4331
24.6	-31.4331
24.65	-31.4331
24.7	-31.4331
24.75	-31.4331
24.8	-31.4331
24.85	-31.7383
24.9	-31.1279
24.95	-31.1279
25	-30.8228
25.05	-31.4331
25.1	-30.8228
25.15	-31.4331
25.2	-31.1279
25.25	-31.1279
25.3	-31.1279
25.35	-31.4331
25.4	-31.4331
25.45	-31.1279
25.5	-31.1279
25.55	-31.4331
25.6	-30.8228
25.65	-31.4331
25.7	-30.8228
25.75	-31.4331
25.8	-31.1279
25.85	-31.4331
25.9	-31.1279
25.95	-31.4331
26	-31.1279
26.05	-31.7383
26.1	-31.4331
26.15	-31.4331
26.2	-31.4331
26.25	-31.4331
26.3	-31.4331
26.35	-31.4331
26.4	-31.1279
26.45	-31.4331
26.5	-31.1279
26.55	-31.1279
26.6	-31.1279
26.65	-30.8228
26.7	-30.5176
26.75	-30.8228
26.8	-30.8228
26.85	-30.5176
26.9	-31.1279
26.95	-30.8228
27	-30.8228
27.05	-31.1279
27.1	-31.4331
27.15	-31.4331
27.2	-31.7383
27.25	-31.7383
27.3	-31.4331
27.35	-31.4331
27.4	-31.4331
27.45	-31.1279
27.5	-31.1279
27.55	-31.4331
27.6	-31.1279
27.65	-30.8228
27.7	-30.8228
27.75	-30.8228
27.8	-30.5176
27.85	-30.8228
27.9	-30.8228
27.95	-30.8228
28	-30.8228
28.05	-31.1279
28.1	-31.1279
28.15	-31.4331
28.2	-31.1279
28.25	-31.4331
28.3	-31.1279
28.35	-31.4331
28.4	-31.1279
28.45	-31.7383
28.5	-31.1279
28.55	-31.1279
28.6	-31.1279
28.65	-31.4331
28.7	-31.1279
28.75	-30.5176
28.8	-30.5176
28.85	-30.5176
28.9	-30.8228
28.95	-30.8228
29	-30.5176
29.05	-31.4331
29.1	-31.1279
29.15	-30.8228
29.2	-30.5176
29.25	-30.2124
29.3	-29.6021
29.35	-28.6865
29.4	-27.771
29.45	-27.4658
29.5	-26.8555
29.55	-25.9399
29.6	-25.0244
29.65	-24.4141
29.7	-23.8037
29.75	-22.8882
29.8	-22.8882
29.85	-21.9727
29.9	-21.6675
29.95	-20.4468
30	-20.1416
30.05	-19.5312
30.1	-19.5312
30.15	-18.3105
30.2	-18.0054
30.25	-17.7002
30.3	-17.395
30.35	-16.7847
30.4	-15.8691
30.45	-15.564
30.5	-14.9536
30.55	-14.6484
30.6	-14.6484
30.65	-13.4277
30.7	-13.1226
30.75	-12.5122
30.8	-11.9019
30.85	-11.5967
30.9	-10.9863
30.95	-10.9863
31	-10.376
31.05	-9.76562
31.1	-9.46045
31.15	-8.8501
31.2	-8.54492
31.25	-8.23975
31.3	-8.23975
31.35	-7.62939
31.4	-7.32422
31.45	-7.01904
31.5	-6.71387
31.55	-6.10352
31.6	-5.79834
31.65	-5.49316
31.7	-5.49316
31.75	-4.57764
31.8	-3.96729
31.85	-3.96729
31.9	-3.35693
31.95	-3.05176
32	-2.74658
32.05	-2.44141
32.1	-2.44141
32.15	-2.13623
32.2	-1.83105
32.25	-1.52588
32.3	-0.915527
32.35	-0.915527
32.4	-0.610352
32.45	-0.305176
32.5	0.305176
32.55	0
32.6	0.610352
32.65	0.610352
32.7	1.2207
32.75	1.52588
32.8	1.52588
32.85	2.13623
32.9	2.13623
32.95	2.74658
33	2.44141
33.05	3.35693
33.1	3.96729
33.15	3.35693
33.2	3.96729
33.25	3.96729
33.3	4.57764
33.35	4.27246
33.4	4.57764
33.45	4.88281
33.5	4.57764
33.55	4.88281
33.6	5.18799
33.65	5.18799
33.7	5.49316
33.75	6.10352
33.8	6.10352
33.85	6.40869
33.9	6.71387
33.95	7.01904
34	7.32422
34.05	7.62939
34.1	7.93457
34.15	7.93457
34.2	8.54492
34.25	8.8501
34.3	8.23975
34.35	8.8501
34.4	8.54492
34.45	8.8501
34.5	8.8501
34.55	8.54492
34.6	8.54492
34.65	8.8501
34.7	8.8501
34.75	8.8501
34.8	9.15527
34.85	9.15527
34.9	9.76562
34.95	9.76562
35	9.76562
35.05	10.376
35.1	10.0708
35.15	10.376
35.2	10.9863
35.25	10.9863
35.3	11.2915
35.35	11.2915
35.4	11.5967
35.45	10.9863
35.5	11.2915
35.55	11.5967
35.6	10.9863
35.65	10.9863
35.7	11.2915
35.75	11.5967
35.8	10.9863
35.85	11.2915
35.9	10.9863
35.95	11.2915
36	11.5967
36.05	11.2915
36.1	11.9019
36.15	11.9019
36.2	12.207
36.25	12.5122
36.3	12.5122
36.35	12.207
36.4	12.5122
36.45	13.1226
36.5	12.8174
36.55	12.8174
36.6	12.8174
36.65	12.8174
36.7	12.5122
36.75	12.5122
36.8	12.8174
36.85	12.5122
36.9	12.5122
36.95	12.5122
37	12.5122
37.05	12.8174
37.1	12.5122
37.15	12.8174
37.2	12.8174
37.25	13.1226
37.3	13.1226
37.35	12.8174
37.4	13.4277
37.45	13.7329
37.5	13.4277
37.55	13.7329
37.6	13.1226
37.65	13.4277
37.7	14.0381
37.75	13.4277
37.8	13.4277
37.85	13.7329
37.9	13.1226
37.95	13.1226
38	13.4277
38.05	13.7329
38.1	13.4277
38.15	13.4277
38.2	13.4277
38.25	13.1226
38.3	13.4277
38.35	14.0381
38.4	13.7329
38.45	14.0381
38.5	14.3433
38.55	13.4277
38.6	13.7329
38.65	13.7329
38.7	13.7329
38.75	13.7329
38.8	13.7329
38.85	13.4277
38.9	13.7329
38.95	13.4277
39	13.7329
39.05	13.4277
39.1	13.7329
39.15	13.7329
39.2	13.7329
39.25	13.7329
39.3	14.0381
39.35	13.4277
39.4	14.0381
39.45	13.7329
39.5	14.0381
39.55	14.0381
39.6	14.0381
39.65	13.4277
39.7	13.7329
39.75	13.7329
39.8	13.7329
39.85	13.7329
39.9	13.7329
39.95	14.0381
40	13.1226
40.05	14.0381
40.1	13.4277
40.15	13.7329
40.2	13.4277
40.25	13.4277
40.3	13.4277
40.35	13.4277
40.4	13.7329
40.45	13.7329
40.5	13.7329
40.55	14.0381
40.6	13.4277
40.65	13.7329
40.7	13.7329
40.75	13.7329
40.8	13.7329
40.85	13.7329
40.9	13.4277
40.95	14.0381
41	13.4277
41.05	13.7329
41.1	13.4277
41.15	13.7329
41.2	13.4277
41.25	13.4277
41.3	13.4277
41.35	13.7329
41.4	14.0381
41.45	13.7329
41.5	14.0381
41.55	13.7329
41.6	13.7329
41.65	13.7329
41.7	14.0381
41.75	13.7329
41.8	13.7329
41.85	13.7329
41.9	13.4277
41.95	13.1226
42	13.1226
42.05	13.1226
42.1	13.4277
42.15	13.1226
42.2	13.1226
42.25	13.4277
42.3	13.4277
42.35	13.4277
42.4	13.7329
42.45	13.7329
42.5	13.7329
42.55	14.0381
42.6	14.3433
42.65	14.0381
42.7	14.0381
42.75	14.3433
42.8	14.0381
42.85	14.6484
42.9	14.0381
42.95	14.0381
43	13.7329
43.05	13.7329
43.1	13.4277
43.15	13.1226
43.2	13.4277
43.25	12.8174
43.3	13.1226
43.35	12.5122
43.4	12.8174
43.45	13.4277
43.5	13.1226
43.55	13.4277
43.6	13.7329
43.65	13.7329
43.7	13.7329
43.75	14.0381
43.8	14.0381
43.85	14.0381
43.9	14.3433
43.95	14.3433
44	14.0381
44.05	14.0381
44.1	13.7329
44.15	14.3433
44.2	13.7329
44.25	14.0381
44.3	13.7329
44.35	13.1226
44.4	13.1226
44.45	12.8174
44.5	13.4277
44.55	13.1226
44.6	12.5122
44.65	12.8174
44.7	12.8174
44.75	13.4277
44.8	13.1226
44.85	13.4277
44.9	13.4277
44.95	13.7329
45	13.4277
45.05	13.1226
45.1	13.7329
45.15	13.4277
45.2	13.4277
45.25	13.7329
45.3	13.4277
45.35	13.4277
45.4	13.7329
45.45	13.1226
45.5	12.8174
45.55	13.4277
45.6	13.1226
45.65	12.8174
45.7	13.4277
45.75	12.8174
45.8	13.1226
45.85	12.8174
45.9	13.1226
45.95	12.8174
46	13.4277
46.05	13.4277
46.1	13.1226
46.15	13.1226
46.2	13.1226
46.25	12.5122
46.3	13.1226
46.35	13.1226
46.4	12.8174
46.45	13.4277
46.5	12.8174
46.55	12.8174
46.6	13.1226
46.65	12.8174
46.7	13.4277
46.75	13.4277
46.8	13.7329
46.85	13.1226
46.9	13.4277
46.95	13.4277
47	13.1226
47.05	13.4277
47.1	13.4277
47.15	13.4277
47.2	13.4277
47.25	12.8174
47.3	13.4277
47.35	13.1226
47.4	12.8174
47.45	12.8174
47.5	13.4277
47.55	13.4277
47.6	12.8174
47.65	12.8174
47.7	12.5122
47.75	13.4277
47.8	12.8174
47.85	13.4277
47.9	13.1226
47.95	13.7329
48	13.4277
48.05	13.4277
48.1	13.7329
48.15	13.4277
48.2	13.4277
48.25	13.1226
48.3	13.7329
48.35	13.4277
48.4	13.1226
48.45	13.4277
48.5	12.8174
48.55	12.8174
48.6	13.4277
48.65	12.8174
48.7	13.4277
48.75	12.8174
48.8	13.4277
48.85	13.1226
48.9	12.5122
48.95	13.1226
49	12.8174
49.05	13.1226
49.1	13.4277
49.15	13.1226
49.2	12.5122
49.25	13.1226
49.3	13.1226
49.35	13.1226
49.4	13.4277
49.45	13.4277
49.5	13.1226
49.55	12.5122
49.6	13.4277
49.65	12.5122
49.7	12.8174
49.75	13.1226
49.8	12.8174
49.85	12.8174
49.9	13.1226
49.95	13.1226
50	12.8174
50.05	12.8174
50.1	12.207
50.15	13.4277
50.2	12.5122
50.25	12.8174
50.3	13.1226
50.35	13.4277
50.4	12.8174
50.45	12.8174
50.5	12.5122
50.55	13.1226
50.6	12.5122
50.65	12.8174
50.7	12.8174
50.75	12.8174
50.8	12.5122
50.85	12.207
50.9	12.207
50.95	12.8174
51	12.8174
51.05	12.8174
51.1	12.8174
51.15	13.4277
51.2	12.8174
51.25	13.1226
51.3	12.8174
51.35	13.1226
51.4	13.1226
51.45	13.1226
51.5	13.1226
51.55	12.8174
51.6	12.8174
51.65	12.8174
51.7	12.5122
51.75	12.8174
51.8	12.5122
51.85	12.5122
51.9	12.8174
51.95	12.8174
52	12.5122
52.05	12.8174
52.1	12.8174
52.15	12.8174
52.2	13.4277
52.25	12.8174
52.3	12.5122
52.35	12.5122
52.4	13.1226
52.45	13.1226
52.5	13.1226
52.55	13.1226
52.6	13.1226
52.65	12.8174
52.7	12.5122
52.75	12.8174
52.8	12.5122
52.85	12.5122
52.9	12.8174
52.95	13.1226
53	13.4277
53.05	12.5122
53.1	12.8174
53.15	12.5122
53.2	12.5122
53.25	12.5122
53.3	12.8174
53.35	12.8174
53.4	12.5122
53.45	13.1226
53.5	12.8174
53.55	12.5122
53.6	12.8174
53.65	12.8174
53.7	12.8174
53.75	12.8174
53.8	12.8174
53.85	12.8174
53.9	12.5122
53.95	12.8174
54	12.8174
54.05	12.5122
54.1	12.8174
54.15	12.8174
54.2	12.8174
54.25	13.1226
54.3	12.8174
54.35	12.5122
54.4	12.8174
54.45	13.1226
54.5	12.5122
54.55	12.5122
54.6	12.8174
54.65	12.8174
54.7	12.5122
54.75	12.5122
54.8	12.207
54.85	12.5122
54.9	12.207
54.95	12.207
55	12.8174
55.05	12.5122
55.1	12.5122
55.15	12.5122
55.2	13.1226
55.25	12.8174
55.3	12.8174
55.35	12.8174
55.4	12.8174
55.45	13.1226
55.5	12.8174
55.55	12.8174
55.6	12.8174
55.65	12.207
55.7	12.8174
55.75	12.207
55.8	12.5122
55.85	12.8174
55.9	12.5122
55.95	12.5122
56	12.207
56.05	12.207
56.1	12.5122
56.15	13.1226
56.2	12.5122
56.25	12.8174
56.3	13.1226
56.35	12.8174
56.4	12.8174
56.45	12.8174
56.5	12.8174
56.55	13.1226
56.6	12.8174
56.65	12.8174
56.7	12.8174
56.75	12.8174
56.8	11.9019
56.85	12.207
56.9	12.5122
56.95	12.5122
57	12.5122
57.05	12.5122
57.1	12.5122
57.15	12.207
57.2	12.5122
57.25	12.5122
57.3	12.5122
57.35	12.5122
57.4	12.207
57.45	12.8174
57.5	12.5122
57.55	12.5122
57.6	12.5122
57.65	12.8174
57.7	13.1226
57.75	13.1226
57.8	12.8174
57.85	13.4277
57.9	12.5122
57.95	12.5122
58	12.5122
58.05	12.8174
58.1	12.5122
58.15	12.207
58.2	12.5122
58.25	12.207
58.3	12.5122
58.35	12.207
58.4	12.207
58.45	12.5122
58.5	12.5122
58.55	12.207
58.6	12.207
58.65	12.5122
58.7	12.8174
58.75	12.5122
58.8	12.8174
58.85	12.5122
58.9	12.8174
58.95	13.1226
59	12.5122
59.05	13.1226
59.1	12.5122
59.15	12.5122
59.2	12.207
59.25	12.207
59.3	12.207
59.35	12.5122
59.4	12.5122
59.45	12.5122
59.5	12.207
59.55	12.207
59.6	12.207
59.65	12.207
59.7	12.207
59.75	12.8174
59.8	12.8174
59.85	12.8174
59.9	12.8174
59.95	12.8174
60	12.8174
60.05	13.1226
60.1	12.8174
60.15	12.207
60.2	11.9019
60.25	12.207
60.3	12.5122
60.35	12.5122
60.4	12.5122
60.45	12.5122
60.5	12.207
60.55	12.207
60.6	12.207
60.65	11.9019
60.7	12.5122
60.75	12.5122
60.8	12.8174
60.85	12.8174
60.9	12.5122
60.95	12.5122
61	12.8174
61.05	12.5122
61.1	13.1226
61.15	12.8174
61.2	12.8174
61.25	12.8174
61.3	12.5122
61.35	12.8174
61.4	12.207
61.45	12.5122
61.5	12.207
61.55	12.5122
61.6	12.5122
61.65	11.9019
61.7	11.9019
61.75	11.9019
61.8	11.9019
61.85	12.207
61.9	12.207
61.95	12.207
62	12.5122
62.05	12.207
62.1	12.5122
62.15	12.5122
62.2	12.5122
62.25	12.8174
62.3	12.8174
62.35	12.5122
62.4	12.5122
62.45	12.5122
62.5	12.5122
62.55	12.8174
62.6	12.8174
62.65	12.5122
62.7	12.5122
62.75	12.207
62.8	12.207
62.85	12.207
62.9	12.207
62.95	12.207
63	11.9019
63.05	12.207
63.1	12.207
63.15	12.207
63.2	12.207
63.25	12.207
63.3	12.5122
63.35	12.5122
63.4	12.5122
63.45	12.207
63.5	12.8174
63.55	12.5122
63.6	12.5122
63.65	12.5122
63.7	12.5122
63.75	12.5122
63.8	12.207
63.85	12.8174
63.9	12.5122
63.95	12.5122
64	12.207
64.05	12.207
64.1	12.5122
64.15	11.9019
64.2	12.5122
64.25	11.9019
64.3	11.9019
64.35	11.9019
64.4	11.2915
64.45	11.9019
64.5	12.207
64.55	11.9019
64.6	12.207
64.65	11.9019
64.7	12.207
64.75	12.207
64.8	12.207
64.85	12.207
64.9	12.207
64.95	12.5122
65	12.8174
65.05	12.207
65.1	12.207
65.15	12.5122
65.2	12.5122
65.25	12.207
65.3	12.5122
65.35	12.5122
65.4	12.5122
65.45	12.207
65.5	12.207
65.55	12.5122
65.6	11.9019
65.65	12.207
65.7	11.9019
65.75	11.9019
65.8	11.5967
65.85	11.9019
65.9	12.207
65.95	12.207
66	11.5967
66.05	12.207
66.1	12.207
66.15	12.207
66.2	12.207
66.25	12.207
66.3	12.207
66.35	12.207
66.4	12.5122
66.45	12.8174
66.5	12.8174
66.55	12.5122
66.6	12.5122
66.65	12.207
66.7	12.5122
66.75	12.207
66.8	12.207
66.85	11.9019
66.9	11.9019
66.95	12.207
67	12.207
67.05	11.5967
67.1	12.207
67.15	11.5967
67.2	11.9019
67.25	11.9019
67.3	12.5122
67.35	12.207
67.4	11.9019
67.45	12.5122
67.5	12.207
67.55	12.5122
67.6	12.5122
67.65	12.207
67.7	12.5122
67.75	11.9019
67.8	12.5122
67.85	12.207
67.9	11.9019
67.95	11.9019
68	12.207
68.05	12.207
68.1	11.9019
68.15	11.9019
68.2	11.9019
68.25	11.9019
68.3	12.207
68.35	12.207
68.4	11.9019
68.45	12.5122
68.5	12.207
68.55	12.207
68.6	11.9019
68.65	12.207
68.7	12.207
68.75	12.207
68.8	12.207
68.85	11.5967
68.9	12.207
68.95	12.207
69	11.9019
69.05	11.9019
69.1	11.9019
69.15	12.207
69.2	12.207
69.25	11.9019
69.3	12.5122
69.35	11.9019
69.4	12.207
69.45	12.207
69.5	12.5122
69.55	11.9019
69.6	12.5122
69.65	12.5122
69.7	12.8174
69.75	12.5122
69.8	12.5122
69.85	12.207
69.9	12.207
69.95	12.207
70	12.207
70.05	12.207
70.1	12.207
70.15	12.207
70.2	11.9019
70.25	11.5967
70.3	11.9019
70.35	11.9019
70.4	12.207
70.45	12.207
70.5	12.207
70.55	12.207
70.6	12.207
70.65	12.5122
70.7	12.207
70.75	12.207
70.8	12.207
70.85	12.207
70.9	11.9019
70.95	12.8174
71	12.207
71.05	11.9019
71.1	11.9019
71.15	11.9019
71.2	12.207
71.25	12.207
71.3	12.207
71.35	11.5967
71.4	11.5967
71.45	11.5967
71.5	11.9019
71.55	11.9019
71.6	12.207
71.65	12.207
71.7	12.207
71.75	12.207
71.8	11.9019
71.85	11.5967
71.9	11.9019
71.95	12.207
72	11.9019
72.05	12.5122
72.1	12.207
72.15	11.9019
72.2	11.9019
72.25	12.207
72.3	11.5967
72.35	11.9019
72.4	12.207
72.45	11.5967
72.5	11.9019
72.55	12.207
72.6	12.207
72.65	12.207
72.7	12.207
72.75	12.207
72.8	12.5122
72.85	12.5122
72.9	12.5122
72.95	12.5122
73	12.5122
73.05	12.207
73.1	11.9019
73.15	11.9019
73.2	11.5967
73.25	12.207
73.3	12.207
73.35	11.9019
73.4	11.9019
73.45	12.207
73.5	12.207
73.55	11.9019
73.6	12.5122
73.65	12.207
73.7	12.5122
73.75	12.5122
73.8	12.5122
73.85	12.207
73.9	11.9019
73.95	12.8174
74	12.8174
74.05	12.5122
74.1	12.5122
74.15	12.5122
74.2	11.9019
74.25	12.207
74.3	12.207
74.35	12.5122
74.4	12.207
74.45	12.207
74.5	12.207
74.55	12.207
74.6	12.207
74.65	12.207
74.7	12.5122
74.75	12.5122
74.8	12.5122
74.85	12.8174
74.9	12.8174
74.95	12.8174
75	12.8174
75.05	12.8174
75.1	12.8174
75.15	13.1226
75.2	12.8174
75.25	12.5122
75.3	12.5122
75.35	12.207
75.4	11.9019
75.45	11.9019
75.5	12.207
75.55	12.8174
75.6	12.207
75.65	12.207
75.7	12.207
75.75	12.5122
75.8	12.8174
75.85	12.8174
75.9	12.5122
75.95	12.5122
76	13.7329
76.05	13.1226
76.1	13.1226
76.15	12.8174
76.2	12.8174
76.25	12.5122
76.3	12.8174
76.35	12.8174
76.4	12.5122
76.45	12.5122
76.5	12.207
76.55	12.207
76.6	12.5122
76.65	11.9019
76.7	12.8174
76.75	12.8174
76.8	12.8174
76.85	12.5122
76.9	12.5122
76.95	13.1226
77	12.8174
77.05	12.8174
77.1	13.4277
77.15	13.4277
77.2	13.1226
77.25	13.4277
77.3	13.1226
77.35	12.8174
77.4	13.1226
77.45	13.1226
77.5	12.5122
77.55	12.5122
77.6	12.8174
77.65	12.5122
77.7	12.8174
77.75	12.207
77.8	12.5122
77.85	12.5122
77.9	12.5122
77.95	12.5122
78	12.5122
78.05	12.8174
78.1	12.5122
78.15	12.8174
78.2	12.8174
78.25	12.8174
78.3	13.4277
78.35	12.8174
78.4	13.4277
78.45	13.4277
78.5	13.1226
78.55	13.4277
78.6	12.8174
78.65	12.8174
78.7	12.8174
78.75	12.5122
78.8	12.8174
78.85	12.8174
78.9	12.5122
78.95	12.207
79	12.5122
79.05	12.207
79.1	12.5122
79.15	12.5122
79.2	13.1226
79.25	12.8174
79.3	13.1226
79.35	13.4277
79.4	12.8174
79.45	13.1226
79.5	13.1226
79.55	13.1226
79.6	13.1226
79.65	12.8174
79.7	13.1226
79.75	12.8174
79.8	13.1226
79.85	12.8174
79.9	12.8174
79.95	12.8174
80	12.5122
80.05	12.5122
80.1	12.8174
80.15	12.8174
80.2	12.5122
80.25	12.8174
80.3	13.1226
80.35	12.8174
80.4	13.1226
80.45	12.8174
80.5	13.1226
80.55	13.4277
80.6	13.1226
80.65	12.8174
80.7	12.8174
80.75	12.8174
80.8	12.5122
80.85	12.5122
80.9	12.5122
80.95	12.8174
81	12.8174
81.05	12.8174
81.1	12.5122
81.15	12.8174
81.2	12.8174
81.25	12.8174
81.3	12.8174
81.35	12.5122
81.4	12.8174
81.45	12.8174
81.5	12.8174
81.55	12.5122
81.6	12.8174
81.65	13.1226
81.7	12.5122
81.75	12.8174
81.8	13.1226
81.85	12.5122
81.9	13.1226
81.95	12.8174
82	12.8174
82.05	12.8174
82.1	13.1226
82.15	12.8174
82.2	12.8174
82.25	12.8174
82.3	12.8174
82.35	12.8174
82.4	13.1226
82.45	12.8174
82.5	13.1226
82.55	12.8174
82.6	12.8174
82.65	12.8174
82.7	12.8174
82.75	12.8174
82.8	12.5122
82.85	12.5122
82.9	12.5122
82.95	12.5122
83	12.5122
83.05	12.8174
83.1	12.8174
83.15	12.8174
83.2	12.8174
83.25	13.1226
83.3	13.4277
83.35	13.1226
83.4	13.4277
83.45	13.4277
83.5	13.1226
83.55	13.1226
83.6	13.1226
83.65	13.4277
83.7	13.1226
83.75	12.8174
83.8	12.207
83.85	12.5122
83.9	12.5122
83.95	12.207
84	12.207
84.05	12.5122
84.1	12.207
84.15	12.207
84.2	12.207
84.25	12.5122
84.3	12.5122
84.35	12.8174
84.4	13.1226
84.45	12.5122
84.5	13.1226
84.55	13.1226
84.6	13.4277
84.65	13.7329
84.7	13.1226
84.75	12.8174
84.8	13.1226
84.85	13.1226
84.9	12.8174
84.95	12.8174
85	12.8174
85.05	12.5122
85.1	12.5122
85.15	12.5122
85.2	12.5122
85.25	12.207
85.3	12.5122
85.35	12.207
85.4	12.5122
85.45	12.5122
85.5	12.8174
85.55	12.5122
85.6	13.1226
85.65	12.8174
85.7	13.4277
85.75	13.1226
85.8	13.1226
85.85	13.1226
85.9	12.8174
85.95	13.1226
86	12.5122
86.05	12.5122
86.1	13.1226
86.15	12.5122
86.2	12.5122
86.25	12.5122
86.3	12.207
86.35	12.207
86.4	12.5122
86.45	12.8174
86.5	12.5122
86.55	12.207
86.6	12.5122
86.65	12.5122
86.7	12.5122
86.75	12.5122
86.8	12.8174
86.85	13.1226
86.9	13.1226
86.95	12.8174
87	13.1226
87.05	12.5122
87.1	12.8174
87.15	12.8174
87.2	12.8174
87.25	12.5122
87.3	12.8174
87.35	12.8174
87.4	12.8174
87.45	12.8174
87.5	12.8174
87.55	12.8174
87.6	12.5122
87.65	12.8174
87.7	12.8174
87.75	12.5122
87.8	12.8174
87.85	13.1226
87.9	12.8174
87.95	13.1226
88	12.8174
88.05	12.8174
88.1	12.8174
88.15	12.8174
88.2	12.5122
88.25	12.5122
88.3	12.8174
88.35	12.8174
88.4	12.5122
88.45	12.5122
88.5	13.1226
88.55	12.8174
88.6	13.1226
88.65	12.5122
88.7	12.8174
88.75	13.4277
88.8	12.8174
88.85	12.8174
88.9	12.8174
88.95	12.8174
89	12.8174
89.05	12.207
89.1	12.8174
89.15	12.5122
89.2	12.8174
89.25	12.8174
89.3	12.8174
89.35	12.5122
89.4	12.5122
89.45	12.8174
89.5	12.5122
89.55	12.5122
89.6	13.1226
89.65	12.8174
89.7	12.8174
89.75	12.8174
89.8	12.5122
89.85	12.8174
89.9	12.8174
89.95	12.8174
90	12.5122
90.05	12.5122
90.1	12.8174
90.15	12.5122
90.2	12.5122
90.25	12.207
90.3	12.5122
90.35	12.207
90.4	12.5122
90.45	12.5122
90.5	12.207
90.55	12.207
90.6	12.8174
90.65	12.8174
90.7	12.207
90.75	12.8174
90.8	12.8174
90.85	12.5122
90.9	12.8174
90.95	12.8174
91	12.8174
91.05	12.8174
91.1	12.8174
91.15	13.1226
91.2	12.8174
91.25	12.5122
91.3	12.207
91.35	12.5122
91.4	12.5122
91.45	12.207
91.5	11.9019
91.55	12.207
91.6	12.5122
91.65	12.5122
91.7	12.5122
91.75	12.5122
91.8	11.9019
91.85	12.207
91.9	12.5122
91.95	12.8174
92	12.207
92.05	12.5122
92.1	12.8174
92.15	12.8174
92.2	12.5122
92.25	12.207
92.3	12.8174
92.35	12.5122
92.4	12.8174
92.45	12.5122
92.5	12.5122
92.55	12.207
92.6	12.8174
92.65	12.207
92.7	12.207
92.75	12.5122
92.8	12.5122
92.85	12.207
92.9	12.5122
92.95	12.8174
93	12.5122
93.05	12.5122
93.1	13.1226
93.15	12.5122
93.2	12.8174
93.25	12.8174
93.3	12.207
93.35	12.8174
93.4	12.5122
93.45	12.8174
93.5	12.207
93.55	12.5122
93.6	12.5122
93.65	12.5122
93.7	12.5122
93.75	12.5122
93.8	12.5122
93.85	12.5122
93.9	12.5122
93.95	12.207
94	12.5122
94.05	12.5122
94.1	12.207
94.15	12.5122
94.2	12.8174
94.25	12.8174
94.3	12.8174
94.35	12.8174
94.4	13.4277
94.45	12.5122
94.5	12.8174
94.55	12.5122
94.6	12.5122
94.65	12.5122
94.7	12.8174
94.75	12.8174
94.8	12.5122
94.85	12.207
94.9	12.5122
94.95	12.5122
95	12.207
95.05	12.5122
95.1	12.5122
95.15	12.5122
95.2	12.8174
95.25	12.5122
95.3	12.5122
95.35	12.5122
95.4	12.8174
95.45	12.8174
95.5	12.8174
95.55	13.1226
95.6	12.8174
95.65	12.8174
95.7	12.5122
95.75	13.1226
95.8	13.1226
95.85	12.5122
95.9	12.8174
95.95	12.5122
96	12.8174
96.05	12.5122
96.1	12.5122
96.15	12.207
96.2	12.5122
96.25	12.207
96.3	12.207
96.35	12.8174
96.4	12.5122
96.45	12.207
96.5	12.207
96.55	12.207
96.6	12.8174
96.65	12.5122
96.7	12.8174
96.75	12.5122
96.8	12.207
96.85	12.5122
96.9	12.8174
96.95	12.8174
97	12.8174
97.05	12.5122
97.1	12.8174
97.15	12.5122
97.2	12.8174
97.25	12.207
97.3	12.8174
97.35	12.5122
97.4	12.5122
97.45	12.207
97.5	12.207
97.55	12.5122
97.6	12.207
97.65	12.8174
97.7	12.207
97.75	12.207
97.8	12.207
97.85	12.207
97.9	12.8174
97.95	12.207
98	12.8174
98.05	12.8174
98.1	12.5122
98.15	13.1226
98.2	13.1226
98.25	13.1226
98.3	12.8174
98.35	12.5122
98.4	13.1226
98.45	13.1226
98.5	12.8174
98.55	12.207
98.6	12.5122
98.65	12.5122
98.7	12.5122
98.75	12.207
98.8	12.5122
98.85	12.207
98.9	12.207
98.95	12.207
99	12.5122
99.05	12.207
99.1	12.5122
99.15	12.207
99.2	13.1226
99.25	12.8174
99.3	12.8174
99.35	12.5122
99.4	12.5122
99.45	12.8174
99.5	12.8174
99.55	12.8174
99.6	12.8174
99.65	12.8174
99.7	12.5122
99.75	12.207
99.8	12.207
99.85	12.5122
[truncated: 3,162 more rows]

## Sheet: Fig. 3A source single AP
Time(ms)	Voltage(mV)
0	-50.8118
0.05	-50.8118
0.1	-50.5066
0.15	-50.5066
0.2	-50.6592
0.25	-50.8118
0.3	-50.6592
0.35	-50.6592
0.4	-50.354
0.45	-50.6592
0.5	-50.6592
0.55	-50.354
0.6	-50.5066
0.65	-50.2014
0.7	-50.354
0.75	-50.354
0.8	-50.354
0.85	-50.354
0.9	-50.354
0.95	-50.5066
1	-50.8118
1.05	-50.6592
1.1	-50.6592
1.15	-50.5066
1.2	-50.6592
1.25	-50.8118
1.3	-50.6592
1.35	-50.6592
1.4	-50.354
1.45	-50.6592
1.5	-50.5066
1.55	-50.5066
1.6	-50.354
1.65	-50.2014
1.7	-50.2014
1.75	-50.0488
1.8	-50.354
1.85	-50.2014
1.9	-50.2014
1.95	-50.2014
2	-50.2014
2.05	-50.2014
2.1	-50.6592
2.15	-50.5066
2.2	-50.354
2.25	-50.5066
2.3	-50.6592
2.35	-50.6592
2.4	-50.8118
2.45	-50.5066
2.5	-50.5066
2.55	-50.5066
2.6	-50.2014
2.65	-50.354
2.7	-50.2014
2.75	-50.2014
2.8	-50.0488
2.85	-50.354
2.9	-50.354
2.95	-50.2014
3	-50.2014
3.05	-50.2014
3.1	-50.0488
3.15	-50.354
3.2	-50.2014
3.25	-50.5066
3.3	-50.354
3.35	-50.354
3.4	-50.2014
3.45	-50.354
3.5	-50.354
3.55	-50.2014
3.6	-50.354
3.65	-50.354
3.7	-50.354
3.75	-50.354
3.8	-50.2014
3.85	-50.2014
3.9	-50.2014
3.95	-50.2014
4	-50.354
4.05	-50.354
4.1	-50.354
4.15	-50.2014
4.2	-50.2014
4.25	-50.2014
4.3	-50.0488
4.35	-50.354
4.4	-50.354
4.45	-49.8962
4.5	-50.0488
4.55	-50.0488
4.6	-50.0488
4.65	-50.0488
4.7	-50.354
4.75	-49.7437
4.8	-50.0488
4.85	-50.2014
4.9	-50.354
4.95	-50.354
5	-50.0488
5.05	-50.354
5.1	-50.354
5.15	-50.354
5.2	-50.5066
5.25	-50.2014
5.3	-50.354
5.35	-50.354
5.4	-50.5066
5.45	-50.354
5.5	-50.2014
5.55	-50.2014
5.6	-50.2014
5.65	-50.2014
5.7	-50.2014
5.75	-49.8962
5.8	-49.8962
5.85	-50.354
5.9	-50.354
5.95	-50.0488
6	-50.2014
6.05	-50.2014
6.1	-50.5066
6.15	-50.2014
6.2	-50.354
6.25	-50.5066
6.3	-50.5066
6.35	-50.5066
6.4	-50.5066
6.45	-49.8962
6.5	-50.2014
6.55	-50.2014
6.6	-50.354
6.65	-49.8962
6.7	-49.8962
6.75	-50.0488
6.8	-50.0488
6.85	-50.2014
6.9	-50.0488
6.95	-50.2014
7	-50.2014
7.05	-50.354
7.1	-50.354
7.15	-50.0488
7.2	-49.8962
7.25	-50.0488
7.3	-50.354
7.35	-50.0488
7.4	-50.2014
7.45	-50.0488
7.5	-49.8962
7.55	-50.0488
7.6	-50.2014
7.65	-49.8962
7.7	-50.0488
7.75	-49.7437
7.8	-49.7437
7.85	-49.8962
7.9	-50.0488
7.95	-50.354
8	-49.8962
8.05	-49.8962
8.1	-49.8962
8.15	-49.8962
8.2	-50.0488
8.25	-49.8962
8.3	-50.0488
8.35	-49.7437
8.4	-49.8962
8.45	-49.8962
8.5	-49.8962
8.55	-49.7437
8.6	-49.7437
8.65	-49.5911
8.7	-49.5911
8.75	-49.4385
8.8	-49.5911
8.85	-49.4385
8.9	-49.7437
8.95	-49.5911
9	-49.7437
9.05	-49.8962
9.1	-49.8962
9.15	-49.7437
9.2	-49.7437
9.25	-49.8962
9.3	-49.8962
9.35	-49.7437
9.4	-49.8962
9.45	-49.5911
9.5	-49.5911
9.55	-49.4385
9.6	-49.4385
9.65	-49.4385
9.7	-49.4385
9.75	-49.4385
9.8	-49.4385
9.85	-49.4385
9.9	-49.5911
9.95	-49.7437
10	-49.5911
10.05	-49.4385
10.1	-49.8962
10.15	-50.0488
10.2	-49.8962
10.25	-49.7437
10.3	-49.7437
10.35	-49.5911
10.4	-49.5911
10.45	-49.5911
10.5	-49.2859
10.55	-49.7437
10.6	-49.5911
10.65	-49.5911
10.7	-49.2859
10.75	-49.2859
10.8	-49.4385
10.85	-49.5911
10.9	-49.7437
10.95	-49.5911
11	-49.7437
11.05	-49.7437
11.1	-49.7437
11.15	-49.7437
11.2	-49.7437
11.25	-49.8962
11.3	-49.5911
11.35	-49.7437
11.4	-49.7437
11.45	-49.7437
11.5	-49.4385
11.55	-49.5911
11.6	-49.5911
11.65	-49.7437
11.7	-49.4385
11.75	-49.5911
11.8	-49.7437
11.85	-49.5911
11.9	-49.4385
11.95	-49.7437
12	-49.8962
12.05	-49.8962
12.1	-49.7437
12.15	-49.8962
12.2	-49.8962
12.25	-49.5911
12.3	-49.5911
12.35	-49.7437
12.4	-49.5911
12.45	-49.5911
12.5	-49.5911
12.55	-49.7437
12.6	-49.7437
12.65	-49.5911
12.7	-49.4385
12.75	-49.5911
12.8	-49.5911
12.85	-49.5911
12.9	-49.8962
12.95	-49.5911
13	-49.8962
13.05	-49.7437
13.1	-49.7437
13.15	-49.8962
13.2	-49.7437
13.25	-49.7437
13.3	-49.7437
13.35	-49.5911
13.4	-49.5911
13.45	-49.7437
13.5	-49.5911
13.55	-49.7437
13.6	-49.7437
13.65	-49.5911
13.7	-49.5911
13.75	-49.5911
13.8	-49.5911
13.85	-49.8962
13.9	-49.7437
13.95	-49.8962
14	-49.7437
14.05	-49.8962
14.1	-49.8962
14.15	-49.8962
14.2	-49.8962
14.25	-49.7437
14.3	-49.5911
14.35	-49.7437
14.4	-49.8962
14.45	-49.7437
14.5	-49.5911
14.55	-49.4385
14.6	-49.5911
14.65	-49.7437
14.7	-49.5911
14.75	-49.5911
14.8	-49.7437
14.85	-49.7437
14.9	-50.0488
14.95	-50.0488
15	-50.2014
15.05	-50.2014
15.1	-49.8962
15.15	-50.0488
15.2	-50.354
15.25	-49.8962
15.3	-49.7437
15.35	-49.8962
15.4	-49.7437
15.45	-49.5911
15.5	-49.5911
15.55	-49.5911
15.6	-49.5911
15.65	-49.5911
15.7	-49.5911
15.75	-49.5911
15.8	-49.5911
15.85	-49.7437
15.9	-50.0488
15.95	-49.8962
16	-49.8962
16.05	-49.8962
16.1	-50.0488
16.15	-49.8962
16.2	-49.8962
16.25	-50.0488
16.3	-49.8962
16.35	-50.2014
16.4	-49.8962
16.45	-49.8962
16.5	-49.7437
16.55	-49.4385
16.6	-49.5911
16.65	-49.7437
16.7	-49.7437
16.75	-49.5911
16.8	-49.5911
16.85	-49.7437
16.9	-49.7437
16.95	-49.5911
17	-49.7437
17.05	-49.7437
17.1	-49.8962
17.15	-49.8962
17.2	-50.0488
17.25	-49.7437
17.3	-49.5911
17.35	-49.7437
17.4	-50.0488
17.45	-49.7437
17.5	-49.7437
17.55	-49.5911
17.6	-49.7437
17.65	-49.5911
17.7	-49.4385
17.75	-49.7437
17.8	-49.5911
17.85	-49.7437
17.9	-49.7437
17.95	-49.7437
18	-49.7437
18.05	-49.7437
18.1	-49.7437
18.15	-49.8962
18.2	-49.8962
18.25	-49.7437
18.3	-49.8962
18.35	-49.7437
18.4	-49.7437
18.45	-49.8962
18.5	-49.7437
18.55	-49.7437
18.6	-49.7437
18.65	-49.8962
18.7	-49.7437
18.75	-49.8962
18.8	-49.7437
18.85	-49.5911
18.9	-49.7437
18.95	-49.8962
19	-49.7437
19.05	-49.8962
19.1	-49.8962
19.15	-50.0488
19.2	-50.0488
19.25	-49.8962
19.3	-49.7437
19.35	-49.7437
19.4	-49.7437
19.45	-50.2014
19.5	-50.2014
19.55	-49.5911
19.6	-49.7437
19.65	-49.8962
19.7	-49.7437
19.75	-49.5911
19.8	-49.7437
19.85	-49.8962
19.9	-49.5911
19.95	-49.8962
20	-49.7437
20.05	-49.7437
20.1	-50.0488
20.15	-49.7437
20.2	-50.2014
20.25	-50.0488
20.3	-49.8962
20.35	-49.7437
20.4	-49.8962
20.45	-49.7437
20.5	-49.7437
20.55	-49.7437
20.6	-49.7437
20.65	-49.7437
20.7	-49.7437
20.75	-49.5911
20.8	-49.4385
20.85	-49.5911
20.9	-49.7437
20.95	-49.7437
21	-49.7437
21.05	-49.8962
21.1	-49.8962
21.15	-50.0488
21.2	-50.0488
21.25	-49.8962
21.3	-50.0488
21.35	-50.2014
21.4	-50.0488
21.45	-50.0488
21.5	-49.8962
21.55	-49.7437
21.6	-49.5911
21.65	-49.7437
21.7	-49.5911
21.75	-49.7437
21.8	-49.7437
21.85	-49.5911
21.9	-49.5911
21.95	-49.7437
22	-49.5911
22.05	-49.7437
22.1	-49.7437
22.15	-49.7437
22.2	-49.8962
22.25	-49.8962
22.3	-49.8962
22.35	-49.8962
22.4	-49.8962
22.45	-49.8962
22.5	-49.8962
22.55	-49.7437
22.6	-49.7437
22.65	-49.7437
22.7	-49.5911
22.75	-49.7437
22.8	-49.5911
22.85	-49.7437
22.9	-49.4385
22.95	-49.7437
23	-49.5911
23.05	-49.7437
23.1	-49.8962
23.15	-49.7437
23.2	-49.4385
23.25	-49.7437
23.3	-49.7437
23.35	-49.7437
23.4	-49.8962
23.45	-49.7437
23.5	-49.5911
23.55	-49.8962
23.6	-49.8962
23.65	-49.8962
23.7	-49.5911
23.75	-49.5911
23.8	-50.0488
23.85	-49.7437
23.9	-49.8962
23.95	-49.5911
24	-49.8962
24.05	-49.8962
24.1	-49.8962
24.15	-50.0488
24.2	-49.8962
24.25	-49.7437
24.3	-49.8962
24.35	-50.0488
24.4	-49.7437
24.45	-49.8962
24.5	-49.8962
24.55	-49.5911
24.6	-49.8962
24.65	-49.7437
24.7	-49.7437
24.75	-49.7437
24.8	-50.0488
24.85	-49.5911
24.9	-49.7437
24.95	-49.8962
25	-50.0488
25.05	-50.0488
25.1	-49.8962
25.15	-49.8962
25.2	-49.7437
25.25	-50.2014
25.3	-50.2014
25.35	-50.2014
25.4	-50.0488
25.45	-50.2014
25.5	-50.0488
25.55	-50.0488
25.6	-49.7437
25.65	-49.8962
25.7	-49.8962
25.75	-49.7437
25.8	-49.5911
25.85	-49.5911
25.9	-49.5911
25.95	-49.5911
26	-49.5911
26.05	-49.5911
26.1	-50.2014
26.15	-50.0488
26.2	-50.0488
26.25	-50.0488
26.3	-50.0488
26.35	-50.0488
26.4	-50.0488
26.45	-49.8962
26.5	-50.0488
26.55	-49.8962
26.6	-49.7437
26.65	-49.8962
26.7	-50.2014
26.75	-49.5911
26.8	-49.7437
26.85	-49.8962
26.9	-49.7437
26.95	-49.8962
27	-49.7437
27.05	-49.8962
27.1	-49.8962
27.15	-50.0488
27.2	-50.2014
27.25	-50.0488
27.3	-50.2014
27.35	-50.2014
27.4	-50.0488
27.45	-50.0488
27.5	-49.8962
27.55	-50.0488
27.6	-50.0488
27.65	-49.8962
27.7	-49.8962
27.75	-49.8962
27.8	-49.8962
27.85	-49.8962
27.9	-50.0488
27.95	-50.0488
28	-49.8962
28.05	-50.0488
28.1	-50.2014
28.15	-50.5066
28.2	-49.8962
28.25	-50.2014
28.3	-50.354
28.35	-50.2014
28.4	-50.0488
28.45	-50.2014
28.5	-50.0488
28.55	-50.2014
28.6	-49.8962
28.65	-49.8962
28.7	-50.2014
28.75	-50.2014
28.8	-49.8962
28.85	-49.8962
28.9	-49.7437
28.95	-50.2014
29	-49.8962
29.05	-49.8962
29.1	-50.2014
29.15	-49.8962
29.2	-49.8962
29.25	-49.5911
29.3	-49.5911
29.35	-49.2859
29.4	-49.2859
29.45	-48.9807
29.5	-48.5229
29.55	-48.5229
29.6	-48.3704
29.65	-48.0652
29.7	-47.6074
29.75	-47.3022
29.8	-46.9971
29.85	-46.8445
29.9	-46.5393
29.95	-46.3867
30	-46.2341
30.05	-46.2341
30.1	-46.0815
30.15	-45.929
30.2	-45.7764
30.25	-45.3186
30.3	-45.6238
30.35	-45.6238
30.4	-45.3186
30.45	-45.166
30.5	-45.0134
30.55	-44.8608
30.6	-44.7083
30.65	-44.5557
30.7	-44.2505
30.75	-44.0979
30.8	-44.2505
30.85	-43.6401
30.9	-43.6401
30.95	-43.335
31	-43.1824
31.05	-43.1824
31.1	-43.1824
31.15	-42.8772
31.2	-42.7246
31.25	-42.7246
31.3	-42.8772
31.35	-42.7246
31.4	-42.4194
31.45	-42.2668
31.5	-42.2668
31.55	-41.9617
31.6	-41.9617
31.65	-41.8091
31.7	-40.8936
31.75	-41.3513
31.8	-40.8936
31.85	-41.0461
31.9	-40.741
31.95	-40.8936
32	-40.5884
32.05	-40.1306
32.1	-39.978
32.15	-40.1306
32.2	-40.2832
32.25	-39.6729
32.3	-39.8254
32.35	-39.8254
32.4	-39.3677
32.45	-39.5203
32.5	-39.5203
32.55	-39.3677
32.6	-39.2151
32.65	-39.0625
32.7	-38.7573
32.75	-38.7573
32.8	-38.6047
32.85	-38.4521
32.9	-38.2996
32.95	-38.147
33	-37.9944
33.05	-37.6892
33.1	-37.8418
33.15	-37.5366
33.2	-37.8418
33.25	-37.2314
33.3	-37.384
33.35	-37.5366
33.4	-37.0789
33.45	-36.9263
33.5	-36.9263
33.55	-36.7737
33.6	-36.6211
33.65	-36.4685
33.7	-36.1633
33.75	-36.1633
33.8	-36.0107
33.85	-35.8582
33.9	-35.553
33.95	-35.2478
34	-35.0952
34.05	-35.0952
34.1	-34.9426
34.15	-34.4849
34.2	-34.6375
34.25	-34.4849
34.3	-34.3323
34.35	-34.3323
34.4	-34.1797
34.45	-34.0271
34.5	-33.8745
34.55	-33.7219
34.6	-33.7219
34.65	-33.7219
34.7	-33.1116
34.75	-32.959
34.8	-32.6538
34.85	-32.3486
34.9	-31.8909
34.95	-31.7383
35	-31.1279
35.05	-30.8228
35.1	-30.5176
35.15	-29.9072
35.2	-29.6021
35.25	-28.9917
35.3	-28.2288
35.35	-27.771
35.4	-26.8555
35.45	-25.3296
35.5	-23.9563
35.55	-21.5149
35.6	-17.8528
35.65	-12.5122
35.7	-5.0354
35.75	3.50952
35.8	12.3596
35.85	20.4468
35.9	27.0081
35.95	32.0435
36	36.4685
36.05	39.6729
36.1	41.8091
36.15	41.9617
36.2	40.4358
36.25	37.6892
36.3	33.8745
36.35	29.4495
36.4	24.4141
36.45	19.2261
36.5	13.5803
36.55	7.78198
36.6	2.28882
36.65	-3.20435
36.7	-8.08716
36.75	-12.97
36.8	-17.8528
36.85	-22.1252
36.9	-26.2451
36.95	-30.2124
37	-33.8745
37.05	-37.0789
37.1	-39.978
37.15	-43.1824
37.2	-45.6238
37.25	-47.9126
37.3	-50.0488
37.35	-51.8799
37.4	-53.7109
37.45	-54.7791
37.5	-55.8472
37.55	-56.7627
37.6	-58.136
37.65	-58.5938
37.7	-59.0515
37.75	-59.6619
37.8	-60.1196
37.85	-60.2722
37.9	-60.4248
37.95	-60.5774
38	-60.8826
38.05	-60.8826
38.1	-60.73
38.15	-60.8826
38.2	-60.5774
38.25	-60.8826
38.3	-60.73
38.35	-60.8826
38.4	-60.73
38.45	-60.5774
38.5	-60.4248
38.55	-60.4248
38.6	-60.4248
38.65	-60.1196
38.7	-60.1196
38.75	-60.2722
38.8	-59.8145
38.85	-59.6619
38.9	-59.5093
38.95	-59.2041
39	-59.0515
39.05	-58.8989
39.1	-58.8989
39.15	-58.7463
39.2	-58.4412
39.25	-58.4412
39.3	-58.5938
39.35	-58.2886
39.4	-58.2886
39.45	-58.4412
39.5	-58.136
39.55	-58.136
39.6	-58.136
39.65	-57.8308
39.7	-58.136
39.75	-57.373
39.8	-57.2205
39.85	-57.373
39.9	-57.2205
39.95	-57.0679
40	-56.9153
40.05	-56.6101
40.1	-56.6101
40.15	-56.6101
40.2	-56.4575
40.25	-56.3049
40.3	-55.9998
40.35	-56.1523
40.4	-55.9998
40.45	-56.1523
40.5	-55.8472
40.55	-55.9998
40.6	-55.9998
40.65	-55.8472
40.7	-55.2368
40.75	-55.542
40.8	-55.2368
40.85	-55.3894
40.9	-55.2368
40.95	-55.0842
41	-54.9316
41.05	-54.7791
41.1	-54.9316
41.15	-54.6265
41.2	-54.6265
41.25	-54.4739
41.3	-54.4739
41.35	-54.6265
41.4	-54.3213
41.45	-54.0161
41.5	-54.1687
41.55	-53.8635
41.6	-53.8635
41.65	-53.8635
41.7	-53.7109
41.75	-53.4058
41.8	-53.1006
41.85	-53.2532
41.9	-53.2532
41.95	-52.948
42	-52.948
42.05	-52.948
42.1	-52.7954
42.15	-52.6428
42.2	-52.6428
42.25	-52.6428
42.3	-52.6428
42.35	-52.4902
42.4	-52.7954
42.45	-52.6428
42.5	-52.6428
42.55	-52.1851
42.6	-52.3376
42.65	-52.3376
42.7	-52.0325
42.75	-51.8799
42.8	-51.7273
42.85	-51.7273
42.9	-51.4221
42.95	-51.1169
43	-50.9644
43.05	-50.9644
43.1	-50.8118
43.15	-50.8118
43.2	-50.6592
43.25	-50.5066
43.3	-50.8118
43.35	-50.6592
43.4	-50.9644
43.45	-50.6592
43.5	-50.6592
43.55	-50.8118
43.6	-50.5066
43.65	-50.5066
43.7	-50.354
43.75	-50.0488
43.8	-50.0488
43.85	-49.8962
43.9	-49.7437
43.95	-49.7437
44	-49.4385
44.05	-49.2859
44.1	-49.4385
44.15	-49.2859
44.2	-49.1333
44.25	-49.1333
44.3	-48.9807
44.35	-49.2859
44.4	-48.9807
44.45	-48.9807
44.5	-48.6755
44.55	-48.9807
44.6	-48.6755
44.65	-48.6755
44.7	-48.5229
44.75	-48.8281
44.8	-48.3704
44.85	-48.3704
44.9	-48.0652
44.95	-48.2178
45	-48.0652
45.05	-47.9126
45.1	-47.9126
45.15	-47.76
45.2	-47.76
45.25	-47.76
45.3	-47.76
45.35	-47.6074
45.4	-47.4548
45.45	-47.9126
45.5	-47.4548
45.55	-47.4548
45.6	-47.4548
45.65	-47.3022
45.7	-47.1497
45.75	-47.1497
45.8	-46.9971
45.85	-46.9971
45.9	-46.6919
45.95	-46.6919
46	-46.6919
46.05	-46.3867
46.1	-46.5393
46.15	-46.6919
46.2	-46.8445
46.25	-46.6919
46.3	-46.3867
46.35	-46.5393
46.4	-46.8445
46.45	-46.3867
46.5	-46.3867
46.55	-46.3867
46.6	-46.0815
46.65	-46.0815
46.7	-46.0815
46.75	-45.929
46.8	-45.929
46.85	-45.6238
46.9	-45.7764
46.95	-45.7764
47	-45.4712
47.05	-45.166
47.1	-45.4712
47.15	-45.3186
47.2	-45.0134
47.25	-45.166
47.3	-45.3186
47.35	-45.166
47.4	-45.3186
47.45	-45.3186
47.5	-45.0134
47.55	-45.166
47.6	-45.166
47.65	-45.166
47.7	-45.166
47.75	-45.0134
47.8	-44.7083
47.85	-44.7083
47.9	-44.7083
47.95	-44.5557
48	-44.5557
48.05	-44.2505
48.1	-44.4031
48.15	-44.0979
48.2	-44.0979
48.25	-44.0979
48.3	-43.6401
48.35	-44.0979
48.4	-44.4031
48.45	-44.4031
48.5	-43.9453
48.55	-44.0979
48.6	-44.0979
48.65	-43.9453
48.7	-43.9453
48.75	-43.6401
48.8	-43.7927
48.85	-43.6401
48.9	-43.4875
48.95	-43.6401
49	-43.335
49.05	-43.1824
49.1	-43.1824
49.15	-43.335
49.2	-43.335
49.25	-43.4875
49.3	-43.335
49.35	-43.1824
49.4	-43.335
49.45	-43.4875
49.5	-43.1824
49.55	-43.1824
49.6	-43.0298
49.65	-43.0298
49.7	-43.335
49.75	-42.8772
49.8	-43.1824
49.85	-42.4194
49.9	-42.8772
49.95	-42.572
50	-42.572
50.05	-42.572
50.1	-42.572
50.15	-42.4194
50.2	-42.7246
50.25	-42.572
50.3	-42.572
50.35	-42.4194
50.4	-42.572
50.45	-42.7246
50.5	-42.4194
50.55	-42.4194
50.6	-42.4194
50.65	-42.572
50.7	-42.4194
50.75	-42.2668
50.8	-42.1143
50.85	-42.2668
50.9	-41.9617
50.95	-41.9617
51	-42.1143
51.05	-41.8091
51.1	-41.9617
51.15	-41.9617
51.2	-42.1143
51.25	-42.2668
51.3	-42.1143
51.35	-42.2668
51.4	-41.9617
51.45	-42.1143
51.5	-41.9617
51.55	-41.9617
51.6	-42.1143
51.65	-41.9617
51.7	-41.9617
51.75	-41.9617
51.8	-41.8091
51.85	-41.9617
51.9	-41.6565
51.95	-41.6565
52	-41.6565
52.05	-41.5039
52.1	-41.5039
52.15	-41.3513
52.2	-41.3513
52.25	-41.5039
52.3	-41.3513
52.35	-41.3513
52.4	-41.8091
52.45	-41.5039
52.5	-41.5039
52.55	-41.3513
52.6	-41.3513
52.65	-41.8091
52.7	-41.5039
52.75	-41.3513
52.8	-41.3513
52.85	-41.0461
52.9	-40.8936
52.95	-41.3513
53	-40.8936
53.05	-40.8936
53.1	-40.741
53.15	-40.5884
53.2	-40.8936
53.25	-40.741
53.3	-40.5884
53.35	-40.4358
53.4	-40.8936
53.45	-40.8936
53.5	-40.5884
53.55	-40.8936
53.6	-40.741
53.65	-40.741
53.7	-40.5884
53.75	-40.741
53.8	-40.5884
53.85	-40.4358
53.9	-40.5884
53.95	-40.5884
54	-40.5884
54.05	-40.5884
54.1	-40.4358
54.15	-40.4358
54.2	-40.5884
54.25	-40.5884
54.3	-40.4358
54.35	-40.741
54.4	-40.5884
54.45	-40.4358
54.5	-40.5884
54.55	-40.5884
54.6	-40.5884
54.65	-40.4358
54.7	-40.4358
54.75	-40.4358
54.8	-40.2832
54.85	-40.2832
54.9	-40.2832
54.95	-40.4358
55	-40.2832
55.05	-40.2832
55.1	-40.2832
55.15	-39.978
55.2	-40.4358
55.25	-40.4358
55.3	-40.2832
55.35	-40.2832
55.4	-40.2832
55.45	-40.2832
55.5	-40.2832
55.55	-40.1306
55.6	-40.1306
55.65	-40.4358
55.7	-40.2832
55.75	-40.2832
55.8	-40.4358
55.85	-39.978
55.9	-40.2832
55.95	-40.1306
56	-40.2832
56.05	-40.2832
56.1	-39.978
56.15	-39.978
56.2	-39.978
56.25	-39.8254
56.3	-40.2832
56.35	-39.978
56.4	-40.2832
56.45	-40.1306
56.5	-40.1306
56.55	-40.2832
56.6	-40.2832
56.65	-40.1306
56.7	-39.978
56.75	-40.2832
56.8	-40.2832
56.85	-39.8254
56.9	-39.978
56.95	-39.978
57	-39.6729
57.05	-39.5203
57.1	-39.6729
57.15	-39.6729
57.2	-39.978
57.25	-39.8254
57.3	-39.978
57.35	-39.8254
57.4	-39.978
57.45	-40.1306
57.5	-40.2832
57.55	-39.8254
57.6	-39.978
57.65	-39.8254
57.7	-40.2832
57.75	-40.5884
57.8	-39.978
57.85	-39.8254
57.9	-39.8254
57.95	-39.8254
58	-39.8254
58.05	-39.5203
58.1	-39.5203
58.15	-39.5203
58.2	-39.8254
58.25	-39.5203
58.3	-39.8254
58.35	-39.8254
58.4	-39.3677
58.45	-39.978
58.5	-39.978
58.55	-39.8254
58.6	-39.978
58.65	-40.2832
58.7	-39.978
58.75	-39.8254
58.8	-39.6729
58.85	-39.5203
58.9	-39.6729
58.95	-39.6729
59	-39.5203
59.05	-39.6729
59.1	-39.8254
59.15	-39.5203
59.2	-39.5203
59.25	-39.6729
59.3	-39.8254
59.35	-39.8254
59.4	-39.6729
59.45	-39.6729
59.5	-39.978
59.55	-39.6729
59.6	-39.6729
59.65	-39.8254
59.7	-39.6729
59.75	-39.8254
59.8	-39.8254
59.85	-39.5203
59.9	-39.8254
59.95	-39.6729
60	-39.8254
60.05	-39.6729
60.1	-39.5203
60.15	-39.6729
60.2	-39.6729
60.25	-39.978
60.3	-39.8254
60.35	-39.8254
60.4	-39.8254
60.45	-39.8254
60.5	-40.1306
60.55	-39.978
60.6	-39.978
60.65	-39.978
60.7	-39.978
60.75	-39.978
60.8	-39.978
60.85	-39.978
60.9	-40.1306
60.95	-40.1306
61	-39.8254
61.05	-39.978
61.1	-39.978
61.15	-39.8254
61.2	-39.8254
61.25	-39.978
61.3	-39.978
61.35	-39.978
61.4	-39.978
61.45	-39.978
61.5	-39.978
61.55	-39.978
61.6	-39.978
61.65	-40.1306
61.7	-39.8254
61.75	-39.8254
61.8	-39.978
61.85	-39.8254
61.9	-39.978
61.95	-39.8254
62	-39.6729
62.05	-39.6729
62.1	-39.978
62.15	-40.1306
62.2	-39.8254
62.25	-39.978
62.3	-39.978
62.35	-39.978
62.4	-40.2832
62.45	-40.2832
62.5	-39.978
62.55	-40.1306
62.6	-40.2832
62.65	-40.1306
62.7	-39.978
62.75	-39.978
62.8	-39.8254
62.85	-39.8254
62.9	-39.978
62.95	-39.8254
63	-39.5203
63.05	-39.5203
63.1	-39.6729
63.15	-39.6729
63.2	-39.6729
63.25	-39.6729
63.3	-39.8254
63.35	-39.978
63.4	-40.1306
63.45	-40.1306
63.5	-40.2832
63.55	-39.978
63.6	-40.1306
63.65	-40.2832
63.7	-40.2832
63.75	-39.978
63.8	-39.978
63.85	-40.2832
63.9	-39.978
63.95	-39.8254
64	-39.978
64.05	-39.978
64.1	-39.8254
64.15	-39.8254
64.2	-39.978
64.25	-39.978
64.3	-39.8254
64.35	-40.1306
64.4	-39.978
64.45	-40.2832
64.5	-40.2832
64.55	-40.2832
64.6	-40.4358
64.65	-40.4358
64.7	-40.2832
64.75	-40.4358
64.8	-40.4358
64.85	-40.4358
64.9	-40.5884
64.95	-40.741
65	-40.2832
65.05	-40.1306
65.1	-40.2832
65.15	-40.2832
65.2	-40.1306
65.25	-40.2832
65.3	-40.2832
65.35	-40.1306
65.4	-40.4358
65.45	-40.4358
65.5	-40.5884
65.55	-40.741
65.6	-40.1306
65.65	-40.8936
65.7	-40.741
65.75	-40.741
65.8	-40.4358
65.85	-40.5884
65.9	-40.741
65.95	-40.4358
66	-40.5884
66.05	-40.5884
66.1	-40.741
66.15	-40.4358
66.2	-40.2832
66.25	-40.741
66.3	-40.4358
66.35	-40.2832
66.4	-40.4358
66.45	-40.5884
66.5	-40.5884
66.55	-40.741
66.6	-40.741
66.65	-40.741
66.7	-40.8936
66.75	-40.8936
66.8	-40.8936
66.85	-41.0461
66.9	-40.8936
66.95	-40.8936
67	-40.741
67.05	-40.5884
67.1	-40.5884
67.15	-40.5884
67.2	-40.741
67.25	-40.5884
67.3	-40.741
67.35	-40.4358
67.4	-40.741
67.45	-40.741
67.5	-40.741
67.55	-40.5884
67.6	-40.8936
67.65	-40.8936
67.7	-41.0461
67.75	-41.0461
67.8	-40.5884
67.85	-40.741
67.9	-40.741
67.95	-40.741
68	-40.741
68.05	-40.741
68.1	-40.741
68.15	-40.741
68.2	-40.5884
68.25	-40.2832
68.3	-40.4358
68.35	-40.741
68.4	-40.5884
68.45	-40.8936
68.5	-40.741
68.55	-40.741
68.6	-40.5884
68.65	-40.5884
68.7	-40.741
68.75	-40.4358
68.8	-40.5884
68.85	-40.5884
68.9	-40.4358
68.95	-40.1306
69	-40.4358
69.05	-40.5884
69.1	-40.4358
69.15	-40.2832
69.2	-40.2832
69.25	-40.4358
69.3	-40.5884
69.35	-40.5884
69.4	-40.2832
69.45	-40.4358
69.5	-40.4358
69.55	-40.2832
69.6	-40.4358
69.65	-40.4358
69.7	-40.2832
69.75	-40.2832
69.8	-40.2832
69.85	-40.4358
69.9	-40.2832
69.95	-40.2832
70	-40.2832
70.05	-40.2832
70.1	-39.978
70.15	-40.1306
70.2	-39.8254
70.25	-39.978
70.3	-39.6729
70.35	-39.978
70.4	-39.978
70.45	-40.1306
70.5	-40.1306
70.55	-39.978
70.6	-40.2832
70.65	-39.978
70.7	-40.2832
70.75	-39.978
70.8	-40.5884
70.85	-40.4358
70.9	-40.1306
70.95	-40.2832
71	-40.2832
71.05	-40.2832
71.1	-39.978
71.15	-40.4358
71.2	-40.2832
71.25	-39.978
71.3	-40.2832
71.35	-40.1306
71.4	-39.8254
71.45	-40.1306
71.5	-40.1306
71.55	-39.978
71.6	-40.4358
71.65	-40.2832
71.7	-40.2832
71.75	-40.2832
71.8	-40.4358
71.85	-40.4358
71.9	-40.4358
71.95	-40.2832
72	-40.2832
72.05	-40.4358
72.1	-40.2832
72.15	-40.5884
72.2	-40.1306
72.25	-39.978
72.3	-40.1306
72.35	-39.978
72.4	-40.1306
72.45	-40.1306
72.5	-40.2832
72.55	-40.4358
72.6	-40.4358
72.65	-40.2832
72.7	-40.4358
72.75	-40.1306
72.8	-40.4358
72.85	-40.5884
72.9	-40.5884
72.95	-40.2832
73	-40.5884
73.05	-40.5884
73.1	-40.5884
73.15	-40.1306
73.2	-40.2832
73.25	-40.2832
73.3	-40.1306
73.35	-40.2832
73.4	-40.2832
73.45	-40.2832
73.5	-40.5884
73.55	-40.4358
73.6	-40.741
73.65	-40.5884
73.7	-40.5884
73.75	-40.741
73.8	-40.741
73.85	-40.741
73.9	-40.8936
73.95	-40.741
74	-40.4358
74.05	-40.4358
74.1	-40.4358
74.15	-40.4358
74.2	-40.2832
74.25	-39.978
74.3	-40.4358
74.35	-40.2832
74.4	-40.1306
74.45	-40.1306
74.5	-40.4358
74.55	-40.4358
74.6	-40.2832
74.65	-40.4358
74.7	-40.5884
74.75	-40.741
74.8	-40.741
74.85	-40.741
74.9	-40.741
74.95	-40.5884
75	-40.4358
75.05	-40.5884
75.1	-40.741
75.15	-40.5884
75.2	-40.2832
75.25	-40.1306
75.3	-40.1306
75.35	-40.5884
75.4	-40.2832
75.45	-40.1306
75.5	-40.1306
75.55	-40.2832
75.6	-40.2832
75.65	-40.741
75.7	-40.4358
75.75	-40.741
75.8	-40.4358
75.85	-40.5884
75.9	-40.741
75.95	-40.5884
76	-40.2832
76.05	-40.5884
76.1	-40.4358
76.15	-40.5884
76.2	-40.5884
76.25	-40.4358
76.3	-40.4358
76.35	-40.1306
76.4	-40.4358
76.45	-40.2832
76.5	-40.4358
76.55	-40.4358
76.6	-40.4358
76.65	-40.4358
76.7	-40.5884
76.75	-40.5884
76.8	-40.5884
76.85	-40.4358
76.9	-40.5884
76.95	-40.5884
77	-40.5884
77.05	-40.5884
77.1	-40.4358
77.15	-40.5884
77.2	-40.741
77.25	-40.5884
77.3	-40.741
77.35	-40.4358
77.4	-40.4358
77.45	-40.2832
77.5	-40.4358
77.55	-40.5884
77.6	-40.5884
77.65	-40.5884
77.7	-40.5884
77.75	-40.8936
77.8	-40.741
77.85	-40.5884
77.9	-40.5884
77.95	-40.741
78	-40.5884
78.05	-40.5884
78.1	-40.4358
78.15	-40.5884
78.2	-40.4358
78.25	-40.4358
78.3	-40.2832
78.35	-40.2832
78.4	-40.2832
78.45	-40.4358
78.5	-40.4358
78.55	-40.4358
78.6	-40.2832
78.65	-40.2832
78.7	-40.741
78.75	-40.5884
78.8	-40.4358
78.85	-40.4358
78.9	-40.5884
78.95	-40.4358
79	-40.5884
79.05	-40.2832
79.1	-40.2832
79.15	-40.1306
79.2	-40.2832
79.25	-40.1306
79.3	-39.8254
79.35	-40.2832
79.4	-39.978
79.45	-39.978
79.5	-39.978
79.55	-40.1306
79.6	-39.8254
79.65	-40.4358
79.7	-40.1306
79.75	-40.1306
79.8	-40.2832
79.85	-40.4358
79.9	-40.2832
79.95	-40.2832
80	-40.1306
80.05	-39.978
80.1	-40.1306
80.15	-40.1306
80.2	-39.978
80.25	-39.978
80.3	-39.8254
80.35	-39.978
80.4	-39.8254
80.45	-39.6729
80.5	-39.978
80.55	-39.978
80.6	-39.978
80.65	-40.1306
80.7	-40.1306
80.75	-40.1306
80.8	-40.4358
80.85	-40.1306
80.9	-39.978
80.95	-40.1306
81	-39.978
81.05	-40.1306
81.1	-39.978
81.15	-39.978
81.2	-39.8254
81.25	-39.978
81.3	-39.8254
81.35	-39.978
81.4	-39.8254
81.45	-39.6729
81.5	-40.1306
81.55	-39.978
81.6	-39.8254
81.65	-39.6729
81.7	-39.8254
81.75	-39.6729
81.8	-39.8254
81.85	-40.1306
81.9	-39.8254
81.95	-39.8254
82	-39.6729
82.05	-39.978
82.1	-39.8254
82.15	-39.978
82.2	-39.8254
82.25	-39.8254
82.3	-39.978
82.35	-39.8254
82.4	-39.978
82.45	-39.978
82.5	-39.978
82.55	-40.1306
82.6	-39.8254
82.65	-39.978
82.7	-39.978
82.75	-39.978
82.8	-40.2832
82.85	-39.978
82.9	-39.8254
82.95	-39.978
83	-39.6729
83.05	-39.978
83.1	-39.978
83.15	-39.8254
83.2	-39.8254
83.25	-39.978
83.3	-39.6729
83.35	-39.6729
83.4	-39.8254
83.45	-39.8254
83.5	-39.978
83.55	-39.978
83.6	-40.1306
83.65	-40.1306
83.7	-39.978
83.75	-40.2832
83.8	-40.2832
83.85	-40.2832
83.9	-40.1306
83.95	-39.978
84	-39.978
84.05	-39.8254
84.1	-39.8254
84.15	-39.8254
84.2	-39.8254
84.25	-39.8254
84.3	-39.5203
84.35	-40.1306
84.4	-40.2832
84.45	-39.978
84.5	-39.8254
84.55	-39.978
84.6	-40.1306
84.65	-40.1306
84.7	-40.2832
84.75	-40.2832
84.8	-40.2832
84.85	-40.4358
84.9	-40.2832
84.95	-40.2832
85	-40.2832
85.05	-39.8254
85.1	-40.2832
85.15	-40.2832
85.2	-40.1306
85.25	-39.978
85.3	-40.1306
85.35	-40.1306
85.4	-39.8254
85.45	-39.978
85.5	-40.4358
85.55	-39.978
85.6	-40.1306
85.65	-40.1306
85.7	-40.2832
85.75	-40.2832
85.8	-40.1306
85.85	-40.4358
85.9	-40.2832
85.95	-40.2832
86	-40.1306
86.05	-40.1306
86.1	-40.2832
86.15	-39.978
86.2	-39.978
86.25	-40.4358
86.3	-40.4358
86.35	-39.978
86.4	-40.2832
86.45	-40.1306
86.5	-40.1306
86.55	-40.4358
86.6	-40.1306
86.65	-40.2832
86.7	-40.4358
86.75	-40.2832
86.8	-40.2832
86.85	-40.2832
86.9	-40.5884
86.95	-40.4358
87	-40.4358
87.05	-40.1306
87.1	-40.1306
87.15	-40.1306
87.2	-39.978
87.25	-39.8254
87.3	-39.8254
87.35	-39.978
87.4	-39.978
87.45	-40.1306
87.5	-40.1306
87.55	-40.2832
87.6	-40.4358
87.65	-40.2832
87.7	-40.4358
87.75	-40.5884
87.8	-40.5884
87.85	-40.4358
87.9	-40.5884
87.95	-40.2832
88	-40.5884
88.05	-40.4358
88.1	-40.2832
88.15	-40.2832
88.2	-40.2832
88.25	-40.4358
88.3	-40.2832
88.35	-40.2832
88.4	-40.4358
88.45	-40.1306
88.5	-40.4358
88.55	-40.2832
88.6	-40.4358
88.65	-40.4358
88.7	-40.4358
88.75	-40.4358
88.8	-40.4358
88.85	-40.741
88.9	-40.5884
88.95	-40.741
89	-40.5884
89.05	-40.5884
89.1	-40.5884
89.15	-40.4358
89.2	-40.5884
89.25	-40.5884
89.3	-40.4358
89.35	-40.4358
89.4	-40.4358
89.45	-40.741
89.5	-40.4358
89.55	-40.5884
89.6	-40.4358
89.65	-40.4358
89.7	-40.5884
89.75	-40.4358
89.8	-40.741
89.85	-40.741
89.9	-40.741
89.95	-40.741
90	-40.741
90.05	-40.741
90.1	-40.2832
90.15	-40.5884
90.2	-40.8936
90.25	-40.5884
90.3	-40.2832
90.35	-40.5884
90.4	-40.4358
90.45	-40.5884
90.5	-40.5884
90.55	-40.741
90.6	-40.741
90.65	-40.741
90.7	-40.741
90.75	-40.741
90.8	-40.5884
90.85	-40.5884
90.9	-40.2832
90.95	-40.8936
91	-40.741
91.05	-40.741
91.1	-40.5884
91.15	-40.4358
91.2	-40.5884
91.25	-40.5884
91.3	-40.741
91.35	-40.5884
91.4	-40.741
91.45	-40.4358
91.5	-40.2832
91.55	-40.5884
91.6	-40.741
91.65	-40.741
91.7	-40.741
91.75	-40.8936
91.8	-40.8936
91.85	-40.8936
91.9	-40.8936
91.95	-40.5884
92	-40.741
92.05	-40.5884
92.1	-40.8936
92.15	-40.741
92.2	-40.5884
92.25	-40.741
92.3	-40.5884
92.35	-40.5884
92.4	-40.741
92.45	-40.5884
92.5	-40.5884
92.55	-40.8936
92.6	-40.741
92.65	-40.5884
92.7	-41.0461
92.75	-41.0461
92.8	-41.0461
92.85	-40.8936
92.9	-40.8936
92.95	-40.8936
93	-41.0461
93.05	-41.3513
93.1	-40.8936
93.15	-40.741
93.2	-40.741
93.25	-41.0461
93.3	-40.8936
93.35	-40.5884
93.4	-40.8936
93.45	-40.4358
93.5	-40.8936
93.55	-40.741
93.6	-40.741
93.65	-40.741
93.7	-40.741
93.75	-41.3513
93.8	-41.3513
93.85	-41.0461
93.9	-41.0461
93.95	-41.0461
94	-41.0461
94.05	-41.3513
94.1	-41.3513
94.15	-40.8936
94.2	-41.0461
94.25	-41.0461
94.3	-40.741
94.35	-40.8936
94.4	-40.8936
94.45	-40.741
94.5	-40.8936
94.55	-41.0461
94.6	-40.8936
94.65	-40.741
94.7	-41.0461
94.75	-41.0461
94.8	-41.0461
94.85	-41.3513
94.9	-41.0461
94.95	-41.5039
95	-41.5039
95.05	-41.0461
95.1	-41.5039
95.15	-40.8936
95.2	-41.3513
95.25	-40.8936
95.3	-41.0461
95.35	-41.0461
95.4	-40.741
95.45	-40.8936
95.5	-40.741
95.55	-40.8936
95.6	-40.8936
95.65	-40.8936
95.7	-40.8936
95.75	-41.0461
95.8	-41.3513
95.85	-41.3513
95.9	-41.0461
95.95	-41.0461
96	-41.5039
96.05	-41.3513
96.1	-41.8091
96.15	-41.3513
96.2	-41.0461
96.25	-41.3513
96.3	-41.3513
96.35	-41.0461
96.4	-41.0461
96.45	-40.8936
96.5	-40.741
96.55	-41.0461
96.6	-41.0461
96.65	-41.3513
96.7	-40.8936
96.75	-41.3513
96.8	-41.0461
96.85	-41.0461
96.9	-41.3513
96.95	-40.8936
97	-41.3513
97.05	-41.3513
97.1	-41.5039
97.15	-41.5039
97.2	-41.3513
97.25	-41.6565
97.3	-41.0461
97.35	-41.3513
97.4	-41.3513
97.45	-41.3513
97.5	-40.8936
97.55	-40.8936
97.6	-41.0461
97.65	-41.0461
97.7	-41.5039
97.75	-41.0461
97.8	-40.8936
97.85	-41.0461
97.9	-41.0461
97.95	-41.0461
98	-41.0461
98.05	-41.3513
98.1	-41.3513
98.15	-41.3513
98.2	-41.3513
98.25	-41.3513
98.3	-41.0461
98.35	-41.0461
98.4	-41.3513
98.45	-41.0461
98.5	-40.8936
98.55	-41.0461
98.6	-40.8936
98.65	-41.0461
98.7	-41.0461
98.75	-40.4358
98.8	-41.0461
98.85	-41.0461
98.9	-41.3513
98.95	-41.3513
99	-41.0461
99.05	-41.3513
99.1	-41.0461
99.15	-41.0461
99.2	-41.0461
99.25	-40.8936
99.3	-41.0461
99.35	-41.0461
99.4	-40.8936
99.45	-40.8936
99.5	-40.8936
99.55	-40.8936
99.6	-41.0461
99.65	-41.0461
99.7	-40.8936
99.75	-41.0461
99.8	-41.3513
99.85	-41.3513
99.9	-41.0461
[truncated: 3,161 more rows]

## Sheet: Fig 3A source phasic
Time(ms)	Voltage(mV)
0	-50.9644
0.05	-50.9644
0.1	-51.2695
0.15	-51.1169
0.2	-51.2695
0.25	-51.1169
0.3	-51.1169
0.35	-51.2695
0.4	-51.2695
0.45	-51.5747
0.5	-51.5747
0.55	-51.7273
0.6	-51.7273
0.65	-51.5747
0.7	-51.7273
0.75	-51.7273
0.8	-51.5747
0.85	-51.8799
0.9	-51.5747
0.95	-51.4221
1	-51.1169
1.05	-51.5747
1.1	-51.4221
1.15	-50.9644
1.2	-50.9644
1.25	-51.1169
1.3	-51.1169
1.35	-51.1169
1.4	-51.1169
1.45	-51.2695
1.5	-51.4221
1.55	-51.2695
1.6	-51.2695
1.65	-51.4221
1.7	-51.7273
1.75	-51.5747
1.8	-51.5747
1.85	-51.7273
1.9	-51.1169
1.95	-51.2695
2	-51.4221
2.05	-51.1169
2.1	-51.2695
2.15	-51.1169
2.2	-51.1169
2.25	-50.9644
2.3	-51.2695
2.35	-51.2695
2.4	-51.1169
2.45	-51.2695
2.5	-51.4221
2.55	-51.7273
2.6	-51.4221
2.65	-51.4221
2.7	-51.5747
2.75	-51.4221
2.8	-51.4221
2.85	-51.2695
2.9	-51.2695
2.95	-51.5747
3	-51.4221
3.05	-51.4221
3.1	-51.2695
3.15	-51.2695
3.2	-50.8118
3.25	-51.2695
3.3	-51.4221
3.35	-51.4221
3.4	-51.1169
3.45	-51.2695
3.5	-51.5747
3.55	-51.4221
3.6	-51.4221
3.65	-51.4221
3.7	-51.5747
3.75	-51.4221
3.8	-51.4221
3.85	-51.1169
3.9	-51.4221
3.95	-51.4221
4	-51.4221
4.05	-51.5747
4.1	-51.2695
4.15	-51.2695
4.2	-51.2695
4.25	-51.4221
4.3	-51.4221
4.35	-51.2695
4.4	-51.5747
4.45	-51.2695
4.5	-51.5747
4.55	-51.7273
4.6	-51.7273
4.65	-51.1169
4.7	-51.5747
4.75	-51.7273
4.8	-51.7273
4.85	-51.4221
4.9	-51.5747
4.95	-51.4221
5	-51.5747
5.05	-51.2695
5.1	-51.4221
5.15	-51.1169
5.2	-50.9644
5.25	-51.2695
5.3	-51.1169
5.35	-51.2695
5.4	-50.9644
5.45	-51.2695
5.5	-51.4221
5.55	-51.4221
5.6	-51.4221
5.65	-51.5747
5.7	-51.7273
5.75	-51.4221
5.8	-51.7273
5.85	-51.7273
5.9	-51.7273
5.95	-51.5747
6	-51.5747
6.05	-51.5747
6.1	-51.1169
6.15	-51.4221
6.2	-50.9644
6.25	-51.2695
6.3	-51.1169
6.35	-51.1169
6.4	-51.1169
6.45	-51.1169
6.5	-51.4221
6.55	-51.5747
6.6	-51.4221
6.65	-51.7273
6.7	-51.5747
6.75	-51.7273
6.8	-51.7273
6.85	-51.7273
6.9	-51.7273
6.95	-51.4221
7	-51.5747
7.05	-51.4221
7.1	-51.4221
7.15	-51.2695
7.2	-51.2695
7.25	-51.1169
7.3	-51.1169
7.35	-51.2695
7.4	-51.1169
7.45	-51.1169
7.5	-51.1169
7.55	-51.4221
7.6	-51.7273
7.65	-51.1169
7.7	-51.5747
7.75	-51.5747
7.8	-51.8799
7.85	-51.7273
7.9	-51.7273
7.95	-51.7273
8	-51.4221
8.05	-51.5747
8.1	-51.5747
8.15	-51.4221
8.2	-51.4221
8.25	-51.5747
8.3	-51.4221
8.35	-51.5747
8.4	-51.4221
8.45	-51.4221
8.5	-51.4221
8.55	-51.4221
8.6	-51.2695
8.65	-51.2695
8.7	-51.1169
8.75	-51.2695
8.8	-51.2695
8.85	-51.4221
8.9	-51.5747
8.95	-51.4221
9	-51.1169
9.05	-51.5747
9.1	-51.4221
9.15	-51.1169
9.2	-51.4221
9.25	-51.4221
9.3	-51.2695
9.35	-51.2695
9.4	-51.4221
9.45	-51.4221
9.5	-51.4221
9.55	-51.5747
9.6	-51.5747
9.65	-51.4221
9.7	-51.2695
9.75	-51.7273
9.8	-51.7273
9.85	-51.5747
9.9	-51.4221
9.95	-51.5747
10	-51.5747
10.05	-51.2695
10.1	-51.4221
10.15	-51.1169
10.2	-51.2695
10.25	-51.4221
10.3	-51.2695
10.35	-51.4221
10.4	-51.1169
10.45	-51.4221
10.5	-51.5747
10.55	-51.5747
10.6	-51.4221
10.65	-51.7273
10.7	-51.7273
10.75	-51.7273
10.8	-51.5747
10.85	-51.7273
10.9	-51.8799
10.95	-51.7273
11	-51.4221
11.05	-51.5747
11.1	-51.4221
11.15	-51.2695
11.2	-51.4221
11.25	-51.4221
11.3	-51.4221
11.35	-51.2695
11.4	-51.4221
11.45	-51.1169
11.5	-51.4221
11.55	-51.4221
11.6	-51.4221
11.65	-51.2695
11.7	-51.5747
11.75	-51.5747
11.8	-51.7273
11.85	-51.4221
11.9	-51.2695
11.95	-51.4221
12	-51.5747
12.05	-51.4221
12.1	-51.4221
12.15	-51.4221
12.2	-51.4221
12.25	-51.2695
12.3	-51.1169
12.35	-51.5747
12.4	-51.4221
12.45	-51.1169
12.5	-51.5747
12.55	-51.5747
12.6	-51.2695
12.65	-51.5747
12.7	-51.5747
12.75	-51.5747
12.8	-51.4221
12.85	-51.4221
12.9	-51.5747
12.95	-51.2695
13	-51.2695
13.05	-51.1169
13.1	-51.2695
13.15	-51.4221
13.2	-51.2695
13.25	-51.5747
13.3	-51.2695
13.35	-50.9644
13.4	-51.1169
13.45	-51.2695
13.5	-51.5747
13.55	-51.7273
13.6	-51.5747
13.65	-51.5747
13.7	-51.5747
13.75	-51.5747
13.8	-51.5747
13.85	-51.5747
13.9	-51.5747
13.95	-51.5747
14	-51.5747
14.05	-51.5747
14.1	-51.8799
14.15	-51.1169
14.2	-51.4221
14.25	-51.1169
14.3	-51.1169
14.35	-51.2695
14.4	-51.1169
14.45	-51.4221
14.5	-51.4221
14.55	-51.4221
14.6	-51.5747
14.65	-51.7273
14.7	-51.7273
14.75	-51.5747
14.8	-51.5747
14.85	-51.7273
14.9	-51.5747
14.95	-51.4221
15	-51.5747
15.05	-51.2695
15.1	-51.5747
15.15	-51.4221
15.2	-51.4221
15.25	-51.1169
15.3	-51.2695
15.35	-50.9644
15.4	-51.5747
15.45	-51.4221
15.5	-51.4221
15.55	-51.8799
15.6	-51.5747
15.65	-51.5747
15.7	-51.5747
15.75	-51.4221
15.8	-51.7273
15.85	-51.7273
15.9	-51.5747
15.95	-51.4221
16	-51.5747
16.05	-51.5747
16.1	-51.4221
16.15	-51.4221
16.2	-51.4221
16.25	-51.5747
16.3	-51.4221
16.35	-51.4221
16.4	-51.4221
16.45	-51.4221
16.5	-51.2695
16.55	-51.2695
16.6	-51.7273
16.65	-51.2695
16.7	-51.4221
16.75	-51.5747
16.8	-51.4221
16.85	-51.5747
16.9	-51.5747
16.95	-51.4221
17	-51.8799
17.05	-51.5747
17.1	-51.5747
17.15	-51.4221
17.2	-51.4221
17.25	-51.4221
17.3	-51.4221
17.35	-51.2695
17.4	-51.2695
17.45	-51.2695
17.5	-51.4221
17.55	-51.2695
17.6	-51.7273
17.65	-51.1169
17.7	-51.4221
17.75	-51.5747
17.8	-51.4221
17.85	-51.5747
17.9	-51.2695
17.95	-51.1169
18	-51.2695
18.05	-51.4221
18.1	-51.1169
18.15	-51.1169
18.2	-51.1169
18.25	-51.1169
18.3	-51.2695
18.35	-51.1169
18.4	-51.4221
18.45	-51.2695
18.5	-51.4221
18.55	-51.4221
18.6	-51.4221
18.65	-51.5747
18.7	-51.4221
18.75	-51.5747
18.8	-51.5747
18.85	-51.5747
18.9	-51.5747
18.95	-51.4221
19	-51.5747
19.05	-51.2695
19.1	-51.1169
19.15	-51.5747
19.2	-51.2695
19.25	-51.2695
19.3	-51.4221
19.35	-51.4221
19.4	-51.1169
19.45	-51.4221
19.5	-51.2695
19.55	-51.5747
19.6	-51.5747
19.65	-51.5747
19.7	-51.5747
19.75	-51.5747
19.8	-51.4221
19.85	-51.7273
19.9	-51.4221
19.95	-51.4221
20	-51.5747
20.05	-51.4221
20.1	-51.2695
20.15	-51.2695
20.2	-51.4221
20.25	-51.2695
20.3	-51.4221
20.35	-51.5747
20.4	-51.2695
20.45	-51.5747
20.5	-51.5747
20.55	-51.2695
20.6	-51.7273
20.65	-51.4221
20.7	-51.7273
20.75	-51.7273
20.8	-51.7273
20.85	-51.8799
20.9	-51.5747
20.95	-51.5747
21	-51.5747
21.05	-51.4221
21.1	-51.4221
21.15	-51.4221
21.2	-51.4221
21.25	-51.1169
21.3	-51.1169
21.35	-51.2695
21.4	-51.4221
21.45	-51.7273
21.5	-51.5747
21.55	-51.5747
21.6	-51.5747
21.65	-51.7273
21.7	-51.7273
21.75	-51.7273
21.8	-51.8799
21.85	-51.7273
21.9	-51.7273
21.95	-51.5747
22	-51.5747
22.05	-51.8799
22.1	-51.5747
22.15	-51.4221
22.2	-51.4221
22.25	-51.4221
22.3	-51.1169
22.35	-51.5747
22.4	-51.2695
22.45	-51.4221
22.5	-51.4221
22.55	-51.5747
22.6	-51.5747
22.65	-51.7273
22.7	-51.8799
22.75	-51.5747
22.8	-51.7273
22.85	-51.8799
22.9	-51.8799
22.95	-51.8799
23	-51.7273
23.05	-51.5747
23.1	-51.5747
23.15	-51.7273
23.2	-51.5747
23.25	-51.5747
23.3	-51.4221
23.35	-51.5747
23.4	-51.4221
23.45	-51.5747
23.5	-51.7273
23.55	-51.7273
23.6	-51.7273
23.65	-51.4221
23.7	-51.5747
23.75	-51.7273
23.8	-51.7273
23.85	-51.7273
23.9	-51.7273
23.95	-51.7273
24	-51.5747
24.05	-51.7273
24.1	-51.7273
24.15	-51.4221
24.2	-51.7273
24.25	-51.5747
24.3	-51.5747
24.35	-51.5747
24.4	-51.4221
24.45	-51.7273
24.5	-51.4221
24.55	-51.5747
24.6	-51.4221
24.65	-51.4221
24.7	-51.8799
24.75	-51.7273
24.8	-51.7273
24.85	-51.7273
24.9	-51.7273
24.95	-51.7273
25	-51.5747
25.05	-51.5747
25.1	-51.4221
25.15	-51.5747
25.2	-51.5747
25.25	-51.5747
25.3	-51.5747
25.35	-51.4221
25.4	-51.4221
25.45	-51.4221
25.5	-51.5747
25.55	-51.5747
25.6	-51.1169
25.65	-51.5747
25.7	-51.5747
25.75	-51.7273
25.8	-52.0325
25.85	-51.4221
25.9	-51.7273
25.95	-51.4221
26	-51.7273
26.05	-51.7273
26.1	-51.4221
26.15	-51.4221
26.2	-51.2695
26.25	-51.2695
26.3	-51.4221
26.35	-51.1169
26.4	-51.2695
26.45	-51.4221
26.5	-51.5747
26.55	-51.5747
26.6	-51.4221
26.65	-51.7273
26.7	-51.7273
26.75	-51.4221
26.8	-51.7273
26.85	-51.7273
26.9	-51.4221
26.95	-51.5747
27	-51.4221
27.05	-51.4221
27.1	-51.4221
27.15	-51.1169
27.2	-51.4221
27.25	-51.4221
27.3	-51.1169
27.35	-51.4221
27.4	-51.1169
27.45	-51.4221
27.5	-51.1169
27.55	-51.4221
27.6	-51.2695
27.65	-51.1169
27.7	-51.4221
27.75	-51.5747
27.8	-51.4221
27.85	-51.5747
27.9	-51.7273
27.95	-51.7273
28	-51.8799
28.05	-51.8799
28.1	-51.5747
28.15	-51.7273
28.2	-51.7273
28.25	-51.1169
28.3	-51.5747
28.35	-51.1169
28.4	-51.5747
28.45	-51.4221
28.5	-51.4221
28.55	-51.1169
28.6	-51.1169
28.65	-50.9644
28.7	-51.1169
28.75	-51.4221
28.8	-51.1169
28.85	-51.2695
28.9	-51.2695
28.95	-51.2695
29	-51.7273
29.05	-51.5747
29.1	-51.5747
29.15	-51.4221
29.2	-50.8118
29.25	-50.6592
29.3	-50.354
29.35	-49.7437
29.4	-49.1333
29.45	-48.8281
29.5	-48.0652
29.55	-47.6074
29.6	-47.76
29.65	-46.9971
29.7	-46.6919
29.75	-45.929
29.8	-45.7764
29.85	-45.4712
29.9	-45.0134
29.95	-44.7083
30	-44.5557
30.05	-43.7927
30.1	-43.4875
30.15	-43.1824
30.2	-43.1824
30.25	-42.4194
30.3	-42.2668
30.35	-41.8091
30.4	-41.5039
30.45	-41.0461
30.5	-40.5884
30.55	-40.4358
30.6	-40.1306
30.65	-39.3677
30.7	-39.5203
30.75	-39.3677
30.8	-38.9099
30.85	-38.6047
30.9	-38.4521
30.95	-37.9944
31	-37.6892
31.05	-37.5366
31.1	-37.0789
31.15	-36.7737
31.2	-36.4685
31.25	-35.8582
31.3	-35.4004
31.35	-35.2478
31.4	-34.4849
31.45	-33.8745
31.5	-34.0271
31.55	-33.4167
31.6	-32.8064
31.65	-32.6538
31.7	-32.0435
31.75	-31.4331
31.8	-31.1279
31.85	-30.5176
31.9	-30.0598
31.95	-29.2969
32	-28.3813
32.05	-27.4658
32.1	-25.9399
32.15	-24.4141
32.2	-21.6675
32.25	-17.8528
32.3	-12.97
32.35	-5.79834
32.4	3.50952
32.45	13.5803
32.5	22.583
32.55	29.7546
32.6	35.553
32.65	40.1306
32.7	44.0979
32.75	46.3867
32.8	46.8445
32.85	45.6238
32.9	42.4194
32.95	38.4521
33	33.5693
33.05	28.5339
33.1	22.7356
33.15	16.6321
33.2	10.2234
33.25	3.66211
33.3	-2.13623
33.35	-7.93457
33.4	-13.1226
33.45	-17.8528
33.5	-22.4304
33.55	-27.1606
33.6	-31.4331
33.65	-35.0952
33.7	-38.4521
33.75	-42.1143
33.8	-44.7083
33.85	-47.3022
33.9	-49.4385
33.95	-51.4221
34	-53.2532
34.05	-54.6265
34.1	-55.8472
34.15	-56.9153
34.2	-57.9834
34.25	-58.5938
34.3	-59.2041
34.35	-59.3567
34.4	-59.5093
34.45	-59.8145
34.5	-60.2722
34.55	-59.8145
34.6	-59.8145
34.65	-59.8145
34.7	-59.8145
34.75	-59.5093
34.8	-59.5093
34.85	-59.3567
34.9	-59.3567
34.95	-59.3567
35	-59.0515
35.05	-59.2041
35.1	-58.4412
35.15	-57.9834
35.2	-58.136
35.25	-57.5256
35.3	-57.2205
35.35	-57.2205
35.4	-57.0679
35.45	-56.6101
35.5	-56.3049
35.55	-56.3049
35.6	-55.9998
35.65	-55.9998
35.7	-55.3894
35.75	-55.542
35.8	-55.3894
35.85	-55.2368
35.9	-55.2368
35.95	-55.0842
36	-54.6265
36.05	-54.6265
36.1	-54.4739
36.15	-54.3213
36.2	-54.0161
36.25	-53.8635
36.3	-53.4058
36.35	-53.4058
36.4	-53.2532
36.45	-52.7954
36.5	-52.7954
36.55	-52.3376
36.6	-52.3376
36.65	-52.1851
36.7	-51.8799
36.75	-51.7273
36.8	-51.5747
36.85	-51.7273
36.9	-51.5747
36.95	-51.4221
37	-51.2695
37.05	-51.4221
37.1	-51.2695
37.15	-50.8118
37.2	-51.1169
37.25	-50.5066
37.3	-50.5066
37.35	-50.5066
37.4	-50.354
37.45	-49.8962
37.5	-50.0488
37.55	-49.7437
37.6	-49.5911
37.65	-49.2859
37.7	-49.1333
37.75	-48.8281
37.8	-48.9807
37.85	-48.9807
37.9	-48.8281
37.95	-48.5229
38	-48.6755
38.05	-48.3704
38.1	-48.5229
38.15	-48.3704
38.2	-48.0652
38.25	-48.0652
38.3	-48.0652
38.35	-47.9126
38.4	-47.76
38.45	-47.4548
38.5	-47.3022
38.55	-47.4548
38.6	-46.8445
38.65	-46.8445
38.7	-46.5393
38.75	-46.5393
38.8	-46.2341
38.85	-46.0815
38.9	-46.0815
38.95	-46.0815
39	-45.7764
39.05	-45.7764
39.1	-45.7764
39.15	-45.7764
39.2	-45.6238
39.25	-45.6238
39.3	-45.3186
39.35	-45.166
39.4	-44.8608
39.45	-45.0134
39.5	-44.8608
39.55	-44.5557
39.6	-44.4031
39.65	-44.2505
39.7	-43.7927
39.75	-44.0979
39.8	-43.6401
39.85	-43.7927
39.9	-43.4875
39.95	-43.335
40	-43.335
40.05	-43.1824
40.1	-43.0298
40.15	-42.8772
40.2	-43.0298
40.25	-42.7246
40.3	-42.8772
40.35	-42.7246
40.4	-42.4194
40.45	-42.572
40.5	-42.2668
40.55	-42.2668
40.6	-41.9617
40.65	-41.9617
40.7	-41.9617
40.75	-41.6565
40.8	-41.6565
40.85	-40.8936
40.9	-41.0461
40.95	-41.0461
41	-40.741
41.05	-40.741
41.1	-40.741
41.15	-40.4358
41.2	-40.4358
41.25	-40.5884
41.3	-40.4358
41.35	-40.2832
41.4	-40.4358
41.45	-40.1306
41.5	-40.1306
41.55	-40.2832
41.6	-39.5203
41.65	-39.6729
41.7	-39.6729
41.75	-39.5203
41.8	-39.2151
41.85	-39.2151
41.9	-39.0625
41.95	-38.9099
42	-38.9099
42.05	-38.6047
42.1	-38.6047
42.15	-38.7573
42.2	-38.6047
42.25	-38.7573
42.3	-38.4521
42.35	-37.9944
42.4	-38.147
42.45	-37.9944
42.5	-37.9944
42.55	-37.8418
42.6	-37.384
42.65	-37.384
42.7	-37.0789
42.75	-37.0789
42.8	-36.7737
42.85	-36.7737
42.9	-36.9263
42.95	-36.6211
43	-36.6211
43.05	-36.4685
43.1	-36.3159
43.15	-36.3159
43.2	-36.3159
43.25	-36.0107
43.3	-36.0107
43.35	-36.0107
43.4	-35.8582
43.45	-35.7056
43.5	-35.7056
43.55	-35.553
43.6	-35.553
43.65	-35.4004
43.7	-35.2478
43.75	-35.0952
43.8	-35.0952
43.85	-34.9426
43.9	-34.79
43.95	-34.6375
44	-34.4849
44.05	-34.3323
44.1	-34.4849
44.15	-34.4849
44.2	-34.3323
44.25	-34.3323
44.3	-34.1797
44.35	-33.8745
44.4	-33.8745
44.45	-33.8745
44.5	-33.4167
44.55	-33.4167
44.6	-33.2642
44.65	-33.1116
44.7	-32.959
44.75	-32.959
44.8	-32.6538
44.85	-32.5012
44.9	-32.0435
44.95	-32.0435
45	-31.7383
45.05	-31.7383
45.1	-31.4331
45.15	-31.4331
45.2	-31.4331
45.25	-30.9753
45.3	-30.8228
45.35	-30.8228
45.4	-30.365
45.45	-30.0598
45.5	-29.9072
45.55	-29.6021
45.6	-29.1443
45.65	-28.8391
45.7	-27.9236
45.75	-27.3132
45.8	-26.8555
45.85	-25.7874
45.9	-25.0244
45.95	-23.6511
46	-21.9727
46.05	-19.6838
46.1	-17.0898
46.15	-12.97
46.2	-7.32422
46.25	-0.610352
46.3	6.56128
46.35	14.1907
46.4	20.4468
46.45	26.2451
46.5	30.365
46.55	34.1797
46.6	36.4685
46.65	37.5366
46.7	37.6892
46.75	36.7737
46.8	34.6375
46.85	32.196
46.9	28.6865
46.95	24.8718
47	20.5994
47.05	16.0217
47.1	10.9863
47.15	6.10352
47.2	1.52588
47.25	-3.05176
47.3	-7.62939
47.35	-11.7493
47.4	-16.0217
47.45	-19.989
47.5	-23.4985
47.55	-27.1606
47.6	-30.6702
47.65	-33.5693
47.7	-36.3159
47.75	-38.7573
47.8	-41.5039
47.85	-43.6401
47.9	-45.7764
47.95	-47.76
48	-48.6755
48.05	-50.5066
48.1	-51.7273
48.15	-52.7954
48.2	-53.5583
48.25	-54.6265
48.3	-55.0842
48.35	-55.6946
48.4	-55.9998
48.45	-56.3049
48.5	-56.7627
48.55	-57.2205
48.6	-57.0679
48.65	-57.5256
48.7	-57.2205
48.75	-57.2205
48.8	-57.0679
48.85	-57.373
48.9	-57.2205
48.95	-57.0679
49	-56.9153
49.05	-56.7627
49.1	-56.4575
49.15	-56.6101
49.2	-56.6101
49.25	-56.4575
49.3	-56.6101
49.35	-56.1523
49.4	-56.3049
49.45	-55.9998
49.5	-55.9998
49.55	-55.6946
49.6	-56.1523
49.65	-55.6946
49.7	-55.2368
49.75	-55.2368
49.8	-55.0842
49.85	-55.0842
49.9	-54.6265
49.95	-54.6265
50	-54.3213
50.05	-54.1687
50.1	-54.1687
50.15	-53.8635
50.2	-53.7109
50.25	-53.5583
50.3	-53.5583
50.35	-53.5583
50.4	-53.2532
50.45	-53.1006
50.5	-52.948
50.55	-53.1006
50.6	-53.1006
50.65	-52.948
50.7	-52.948
50.75	-52.4902
50.8	-52.6428
50.85	-52.6428
50.9	-52.1851
50.95	-52.7954
51	-51.8799
51.05	-51.7273
51.1	-51.8799
51.15	-51.5747
51.2	-51.5747
51.25	-50.9644
51.3	-51.1169
51.35	-50.9644
51.4	-50.8118
51.45	-50.8118
51.5	-50.9644
51.55	-50.8118
51.6	-50.8118
51.65	-50.6592
51.7	-50.354
51.75	-50.5066
51.8	-50.2014
51.85	-50.0488
51.9	-49.8962
51.95	-50.0488
52	-49.8962
52.05	-49.5911
52.1	-49.4385
52.15	-49.2859
52.2	-49.1333
52.25	-48.9807
52.3	-49.1333
52.35	-48.6755
52.4	-48.9807
52.45	-48.5229
52.5	-48.5229
52.55	-48.5229
52.6	-48.3704
52.65	-48.3704
52.7	-48.2178
52.75	-48.2178
52.8	-48.0652
52.85	-48.0652
52.9	-47.9126
52.95	-47.76
53	-47.6074
53.05	-47.3022
53.1	-47.4548
53.15	-47.4548
53.2	-46.8445
53.25	-46.8445
53.3	-46.6919
53.35	-46.5393
53.4	-46.3867
53.45	-46.2341
53.5	-46.2341
53.55	-46.0815
53.6	-46.2341
53.65	-46.0815
53.7	-46.0815
53.75	-45.929
53.8	-45.929
53.85	-46.0815
53.9	-45.6238
53.95	-45.6238
54	-45.4712
54.05	-45.4712
54.1	-45.0134
54.15	-45.0134
54.2	-44.8608
54.25	-44.7083
54.3	-44.7083
54.35	-44.5557
54.4	-44.4031
54.45	-44.4031
54.5	-44.2505
54.55	-44.2505
54.6	-44.0979
54.65	-44.0979
54.7	-43.9453
54.75	-43.7927
54.8	-43.7927
54.85	-43.6401
54.9	-43.9453
54.95	-43.4875
55	-43.4875
55.05	-43.4875
55.1	-43.335
55.15	-43.1824
55.2	-42.8772
55.25	-43.0298
55.3	-42.7246
55.35	-42.7246
55.4	-42.572
55.45	-42.2668
55.5	-42.2668
55.55	-42.1143
55.6	-42.2668
55.65	-41.9617
55.7	-42.1143
55.75	-42.1143
55.8	-42.2668
55.85	-41.8091
55.9	-41.8091
55.95	-41.5039
56	-41.6565
56.05	-41.8091
56.1	-41.5039
56.15	-41.3513
56.2	-40.8936
56.25	-40.741
56.3	-40.741
56.35	-40.741
56.4	-40.5884
56.45	-40.5884
56.5	-40.5884
56.55	-40.5884
56.6	-40.4358
56.65	-40.2832
56.7	-40.4358
56.75	-40.2832
56.8	-40.4358
56.85	-40.2832
56.9	-40.1306
56.95	-39.978
57	-39.978
57.05	-40.1306
57.1	-39.5203
57.15	-39.6729
57.2	-39.6729
57.25	-39.5203
57.3	-39.5203
57.35	-39.5203
57.4	-38.9099
57.45	-39.0625
57.5	-39.0625
57.55	-38.7573
57.6	-38.7573
57.65	-38.6047
57.7	-38.7573
57.75	-38.6047
57.8	-38.9099
57.85	-38.7573
57.9	-38.7573
57.95	-38.6047
58	-38.4521
58.05	-38.147
58.1	-37.9944
58.15	-37.9944
58.2	-37.9944
58.25	-37.9944
58.3	-37.9944
58.35	-37.6892
58.4	-37.384
58.45	-37.5366
58.5	-37.384
58.55	-37.2314
58.6	-37.384
58.65	-37.384
58.7	-37.0789
58.75	-37.2314
58.8	-37.2314
58.85	-37.0789
58.9	-37.2314
58.95	-37.0789
59	-37.0789
59.05	-36.9263
59.1	-36.6211
59.15	-36.7737
59.2	-36.6211
59.25	-36.4685
59.3	-36.4685
59.35	-36.3159
59.4	-36.1633
59.45	-36.1633
59.5	-36.0107
59.55	-36.0107
59.6	-35.8582
59.65	-35.8582
59.7	-35.8582
59.75	-36.0107
59.8	-35.8582
59.85	-35.7056
59.9	-35.7056
59.95	-35.553
60	-35.7056
60.05	-35.7056
60.1	-35.7056
60.15	-35.553
60.2	-35.2478
60.25	-35.4004
60.3	-35.0952
60.35	-35.2478
60.4	-34.6375
60.45	-34.79
60.5	-34.9426
60.55	-34.9426
60.6	-34.79
60.65	-34.79
60.7	-34.9426
60.75	-34.79
60.8	-34.79
60.85	-34.79
60.9	-34.79
60.95	-34.6375
61	-34.79
61.05	-34.3323
61.1	-34.3323
61.15	-34.3323
61.2	-34.1797
61.25	-34.0271
61.3	-34.1797
61.35	-33.8745
61.4	-33.5693
61.45	-33.4167
61.5	-33.2642
61.55	-33.1116
61.6	-33.1116
61.65	-32.959
61.7	-32.959
61.75	-32.959
61.8	-33.2642
61.85	-33.1116
61.9	-32.959
61.95	-32.8064
62	-32.959
62.05	-32.6538
62.1	-32.8064
62.15	-32.5012
62.2	-32.5012
62.25	-32.5012
62.3	-32.3486
62.35	-31.8909
62.4	-31.8909
62.45	-31.8909
62.5	-31.4331
62.55	-31.5857
62.6	-31.1279
62.65	-30.9753
62.7	-30.8228
62.75	-30.9753
62.8	-30.6702
62.85	-30.8228
62.9	-30.5176
62.95	-30.365
63	-30.5176
63.05	-30.365
63.1	-30.2124
63.15	-29.9072
63.2	-29.9072
63.25	-29.9072
63.3	-29.2969
63.35	-29.1443
63.4	-28.6865
63.45	-28.2288
63.5	-27.771
63.55	-27.4658
63.6	-26.7029
63.65	-26.0925
63.7	-25.6348
63.75	-24.2615
63.8	-22.8882
63.85	-21.2097
63.9	-18.7683
63.95	-15.564
64	-11.2915
64.05	-5.49316
64.1	0.762939
64.15	7.01904
64.2	13.4277
64.25	19.0735
64.3	23.6511
64.35	27.6184
64.4	30.9753
64.45	32.959
64.5	34.3323
64.55	34.3323
64.6	33.5693
64.65	32.196
64.7	29.7546
64.75	27.0081
64.8	23.4985
64.85	19.989
64.9	15.8691
64.95	11.5967
65	7.32422
65.05	2.89917
65.1	-1.06812
65.15	-5.18799
65.2	-9.30786
65.25	-12.97
65.3	-16.4795
65.35	-19.5312
65.4	-23.0408
65.45	-26.3977
65.5	-29.2969
65.55	-32.0435
65.6	-34.79
65.65	-37.0789
65.7	-39.3677
65.75	-41.5039
65.8	-43.4875
65.85	-45.166
65.9	-46.8445
65.95	-48.2178
66	-49.5911
66.05	-50.8118
66.1	-51.7273
66.15	-52.4902
66.2	-53.7109
66.25	-53.8635
66.3	-54.3213
66.35	-55.0842
66.4	-55.3894
66.45	-55.542
66.5	-55.8472
66.55	-55.9998
66.6	-56.1523
66.65	-56.3049
66.7	-56.3049
66.75	-56.4575
66.8	-55.9998
66.85	-56.3049
66.9	-56.4575
66.95	-56.4575
67	-56.3049
67.05	-56.3049
67.1	-56.3049
67.15	-56.3049
67.2	-55.9998
67.25	-56.1523
67.3	-55.8472
67.35	-55.9998
67.4	-55.6946
67.45	-55.6946
67.5	-55.6946
67.55	-55.542
67.6	-55.2368
67.65	-55.0842
67.7	-54.9316
67.75	-54.4739
67.8	-54.3213
67.85	-54.1687
67.9	-54.1687
67.95	-54.0161
68	-53.5583
68.05	-53.8635
68.1	-53.5583
68.15	-53.8635
68.2	-53.7109
68.25	-53.4058
68.3	-53.8635
68.35	-53.5583
68.4	-53.7109
68.45	-53.2532
68.5	-53.2532
68.55	-53.2532
68.6	-53.1006
68.65	-53.1006
68.7	-52.7954
68.75	-52.7954
68.8	-52.4902
68.85	-52.1851
68.9	-52.1851
68.95	-51.7273
69	-51.7273
69.05	-51.7273
69.1	-51.5747
69.15	-51.4221
69.2	-51.4221
69.25	-51.1169
69.3	-51.2695
69.35	-51.2695
69.4	-51.1169
69.45	-50.9644
69.5	-51.1169
69.55	-50.6592
69.6	-50.6592
69.65	-50.5066
69.7	-50.8118
69.75	-50.8118
69.8	-50.0488
69.85	-49.8962
69.9	-49.8962
69.95	-49.7437
70	-49.7437
70.05	-49.5911
70.1	-49.2859
70.15	-49.1333
70.2	-49.2859
70.25	-49.2859
70.3	-48.9807
70.35	-48.8281
70.4	-48.8281
70.45	-48.6755
70.5	-48.6755
70.55	-48.3704
70.6	-48.5229
70.65	-48.5229
70.7	-48.0652
70.75	-47.9126
70.8	-47.9126
70.85	-47.9126
70.9	-47.6074
70.95	-47.6074
71	-47.4548
71.05	-47.3022
71.1	-47.4548
71.15	-47.3022
71.2	-47.3022
71.25	-46.6919
71.3	-46.9971
71.35	-46.9971
71.4	-46.8445
71.45	-46.6919
71.5	-46.5393
71.55	-46.5393
71.6	-46.5393
71.65	-46.3867
71.7	-46.0815
71.75	-46.2341
71.8	-46.0815
71.85	-45.6238
71.9	-45.7764
71.95	-45.6238
72	-45.4712
72.05	-45.3186
72.1	-45.166
72.15	-45.0134
72.2	-45.0134
72.25	-45.3186
72.3	-45.166
72.35	-44.7083
72.4	-44.8608
72.45	-44.8608
72.5	-44.8608
72.55	-44.7083
72.6	-44.8608
72.65	-44.8608
72.7	-44.5557
72.75	-44.2505
72.8	-44.0979
72.85	-44.2505
72.9	-43.9453
72.95	-44.0979
73	-43.6401
73.05	-43.1824
73.1	-43.4875
73.15	-43.335
73.2	-43.1824
73.25	-43.1824
73.3	-42.8772
73.35	-43.1824
73.4	-43.1824
73.45	-42.8772
73.5	-42.8772
73.55	-43.0298
73.6	-42.8772
73.65	-42.7246
73.7	-42.7246
73.75	-42.7246
73.8	-42.4194
73.85	-42.4194
73.9	-42.2668
73.95	-42.4194
74	-42.1143
74.05	-41.9617
74.1	-42.2668
74.15	-41.6565
74.2	-41.5039
74.25	-41.8091
74.3	-41.3513
74.35	-41.5039
74.4	-41.3513
74.45	-41.3513
74.5	-41.3513
74.55	-41.0461
74.6	-41.3513
74.65	-41.0461
74.7	-41.0461
74.75	-40.8936
74.8	-40.8936
74.85	-41.0461
74.9	-40.741
74.95	-40.741
75	-40.2832
75.05	-40.2832
75.1	-40.4358
75.15	-40.4358
75.2	-40.2832
75.25	-40.1306
75.3	-40.1306
75.35	-39.978
75.4	-39.8254
75.45	-39.978
75.5	-39.978
75.55	-39.978
75.6	-39.978
75.65	-39.8254
75.7	-39.6729
75.75	-39.8254
75.8	-39.6729
75.85	-39.3677
75.9	-39.3677
75.95	-39.3677
76	-39.2151
76.05	-39.2151
76.1	-39.0625
76.15	-39.0625
76.2	-38.9099
76.25	-39.2151
76.3	-39.0625
76.35	-38.9099
76.4	-38.7573
76.45	-38.9099
76.5	-38.9099
76.55	-38.7573
76.6	-38.7573
76.65	-38.9099
76.7	-38.9099
76.75	-38.7573
76.8	-38.6047
76.85	-38.6047
76.9	-38.6047
76.95	-38.4521
77	-38.6047
77.05	-38.2996
77.1	-38.4521
77.15	-38.147
77.2	-37.9944
77.25	-37.9944
77.3	-37.8418
77.35	-37.9944
77.4	-37.8418
77.45	-37.8418
77.5	-37.9944
77.55	-37.8418
77.6	-37.8418
77.65	-37.5366
77.7	-37.8418
77.75	-37.5366
77.8	-37.6892
77.85	-37.8418
77.9	-37.5366
77.95	-37.6892
78	-37.5366
78.05	-37.2314
78.1	-37.2314
78.15	-37.0789
78.2	-37.384
78.25	-37.0789
78.3	-37.0789
78.35	-36.7737
78.4	-36.7737
78.45	-36.7737
78.5	-36.7737
78.55	-36.7737
78.6	-36.7737
78.65	-36.6211
78.7	-36.7737
78.75	-36.7737
78.8	-36.9263
78.85	-36.9263
78.9	-36.9263
78.95	-36.7737
79	-36.6211
79.05	-36.6211
79.1	-36.1633
79.15	-36.4685
79.2	-36.4685
79.25	-36.6211
79.3	-36.4685
79.35	-36.1633
79.4	-35.8582
79.45	-36.1633
79.5	-36.1633
79.55	-36.1633
79.6	-36.1633
79.65	-36.1633
79.7	-36.0107
79.75	-36.3159
79.8	-36.3159
79.85	-36.1633
79.9	-36.0107
79.95	-36.1633
80	-36.3159
80.05	-35.8582
80.1	-36.0107
80.15	-35.7056
80.2	-35.7056
80.25	-35.7056
80.3	-35.4004
80.35	-35.4004
80.4	-35.4004
80.45	-35.4004
80.5	-35.2478
80.55	-34.6375
80.6	-35.4004
80.65	-35.4004
80.7	-35.4004
80.75	-35.2478
80.8	-35.2478
80.85	-35.4004
80.9	-35.4004
80.95	-35.4004
81	-35.0952
81.05	-34.79
81.1	-35.0952
81.15	-34.79
81.2	-34.9426
81.25	-34.79
81.3	-34.6375
81.35	-34.3323
81.4	-34.3323
81.45	-34.4849
81.5	-34.3323
81.55	-34.6375
81.6	-34.3323
81.65	-34.3323
81.7	-34.3323
81.75	-34.4849
81.8	-34.6375
81.85	-34.4849
81.9	-34.4849
81.95	-34.4849
82	-34.0271
82.05	-34.6375
82.1	-34.1797
82.15	-34.3323
82.2	-34.3323
82.25	-34.3323
82.3	-34.0271
82.35	-34.1797
82.4	-34.1797
82.45	-34.1797
82.5	-34.0271
82.55	-34.0271
82.6	-34.0271
82.65	-34.0271
82.7	-34.1797
82.75	-34.0271
82.8	-34.1797
82.85	-34.1797
82.9	-34.1797
82.95	-33.8745
83	-34.1797
83.05	-34.1797
83.1	-34.1797
83.15	-34.0271
83.2	-33.8745
83.25	-34.0271
83.3	-34.0271
83.35	-34.0271
83.4	-34.0271
83.45	-33.8745
83.5	-33.8745
83.55	-33.5693
83.6	-33.8745
83.65	-33.5693
83.7	-33.8745
83.75	-33.5693
83.8	-33.7219
83.85	-33.8745
83.9	-33.7219
83.95	-34.0271
84	-33.8745
84.05	-33.7219
84.1	-33.7219
84.15	-33.5693
84.2	-33.4167
84.25	-33.4167
84.3	-33.4167
84.35	-33.4167
84.4	-33.4167
84.45	-33.2642
84.5	-33.4167
84.55	-33.2642
84.6	-33.2642
84.65	-33.1116
84.7	-33.5693
84.75	-33.4167
84.8	-33.2642
84.85	-33.5693
84.9	-33.5693
84.95	-33.8745
85	-33.4167
85.05	-33.4167
85.1	-33.5693
85.15	-33.5693
85.2	-33.4167
85.25	-33.2642
85.3	-33.4167
85.35	-33.4167
85.4	-33.5693
85.45	-33.2642
85.5	-33.1116
85.55	-33.1116
85.6	-32.8064
85.65	-33.4167
85.7	-33.2642
85.75	-33.2642
85.8	-33.2642
85.85	-33.4167
85.9	-33.4167
85.95	-33.5693
86	-33.7219
86.05	-33.5693
86.1	-33.7219
86.15	-33.5693
86.2	-33.5693
86.25	-33.5693
86.3	-33.7219
86.35	-33.4167
86.4	-33.4167
86.45	-33.7219
86.5	-33.4167
86.55	-33.2642
86.6	-33.4167
86.65	-33.2642
86.7	-33.5693
86.75	-33.7219
86.8	-33.5693
86.85	-33.5693
86.9	-33.5693
86.95	-33.8745
87	-34.0271
87.05	-33.7219
87.1	-34.1797
87.15	-34.3323
87.2	-34.6375
87.25	-34.4849
87.3	-34.3323
87.35	-34.6375
87.4	-34.6375
87.45	-34.6375
87.5	-34.79
87.55	-34.6375
87.6	-34.6375
87.65	-34.79
87.7	-34.79
87.75	-34.79
87.8	-34.9426
87.85	-34.79
87.9	-35.0952
87.95	-35.0952
88	-34.9426
88.05	-35.0952
88.1	-35.2478
88.15	-35.553
88.2	-35.553
88.25	-35.553
88.3	-35.7056
88.35	-35.8582
88.4	-35.8582
88.45	-35.8582
88.5	-35.7056
88.55	-36.1633
88.6	-36.0107
88.65	-36.1633
88.7	-36.3159
88.75	-36.3159
88.8	-36.3159
88.85	-36.3159
88.9	-36.3159
88.95	-36.4685
89	-36.3159
89.05	-36.4685
89.1	-36.6211
89.15	-36.7737
89.2	-36.7737
89.25	-36.7737
89.3	-36.6211
89.35	-36.6211
89.4	-36.9263
89.45	-36.7737
89.5	-36.7737
89.55	-36.9263
89.6	-36.9263
89.65	-36.9263
89.7	-36.9263
89.75	-37.2314
89.8	-36.9263
89.85	-37.384
89.9	-37.384
89.95	-37.384
90	-37.5366
90.05	-37.384
90.1	-37.5366
90.15	-37.5366
90.2	-37.6892
90.25	-37.384
90.3	-37.6892
90.35	-37.5366
90.4	-37.384
90.45	-37.6892
90.5	-37.5366
90.55	-37.5366
90.6	-37.5366
90.65	-37.6892
90.7	-37.5366
90.75	-37.6892
90.8	-37.8418
90.85	-37.6892
90.9	-37.8418
90.95	-37.8418
91	-37.6892
91.05	-37.8418
91.1	-38.147
91.15	-37.9944
91.2	-37.9944
91.25	-37.9944
91.3	-37.9944
91.35	-38.147
91.4	-38.2996
91.45	-38.2996
91.5	-37.9944
91.55	-37.9944
91.6	-37.8418
91.65	-37.8418
91.7	-37.5366
91.75	-37.5366
91.8	-37.8418
91.85	-37.9944
91.9	-38.147
91.95	-37.9944
92	-37.8418
92.05	-38.2996
92.1	-37.9944
92.15	-38.2996
92.2	-38.4521
92.25	-37.9944
92.3	-38.147
92.35	-38.147
92.4	-38.2996
92.45	-38.147
92.5	-38.2996
92.55	-38.147
92.6	-38.147
92.65	-38.147
92.7	-37.9944
92.75	-37.9944
92.8	-37.9944
92.85	-38.147
92.9	-38.4521
92.95	-37.9944
93	-38.2996
93.05	-38.2996
93.1	-38.2996
93.15	-38.2996
93.2	-38.2996
93.25	-38.2996
93.3	-38.2996
93.35	-38.2996
93.4	-38.4521
93.45	-38.147
93.5	-38.2996
93.55	-37.8418
93.6	-38.147
93.65	-38.147
93.7	-38.147
93.75	-37.8418
93.8	-37.9944
93.85	-37.8418
93.9	-37.8418
93.95	-37.9944
94	-38.147
94.05	-37.9944
94.1	-37.9944
94.15	-37.9944
94.2	-37.9944
94.25	-38.2996
94.3	-37.9944
94.35	-38.2996
94.4	-38.147
94.45	-37.8418
94.5	-37.9944
94.55	-37.8418
94.6	-37.8418
94.65	-37.9944
94.7	-37.6892
94.75	-37.5366
94.8	-37.9944
94.85	-37.384
94.9	-37.6892
94.95	-37.5366
95	-37.0789
95.05	-37.8418
95.1	-37.8418
95.15	-37.5366
95.2	-37.5366
95.25	-37.8418
95.3	-37.6892
95.35	-37.8418
95.4	-37.6892
95.45	-37.5366
95.5	-37.6892
95.55	-37.6892
95.6	-37.2314
95.65	-37.5366
95.7	-37.5366
95.75	-37.384
95.8	-37.6892
95.85	-37.5366
95.9	-37.384
95.95	-37.0789
96	-37.384
96.05	-37.384
96.1	-37.5366
96.15	-37.5366
96.2	-37.384
96.25	-37.5366
96.3	-37.5366
96.35	-37.8418
96.4	-37.384
96.45	-37.0789
96.5	-37.384
96.55	-37.2314
96.6	-37.2314
96.65	-37.2314
96.7	-37.0789
96.75	-37.0789
96.8	-36.7737
96.85	-36.9263
96.9	-36.9263
96.95	-36.9263
97	-36.9263
97.05	-36.9263
97.1	-37.0789
97.15	-36.7737
97.2	-36.9263
97.25	-36.9263
97.3	-37.0789
97.35	-36.9263
97.4	-36.9263
97.45	-36.7737
97.5	-36.7737
97.55	-36.7737
97.6	-36.7737
97.65	-36.7737
97.7	-36.6211
97.75	-36.6211
97.8	-36.7737
97.85	-36.6211
97.9	-36.3159
97.95	-36.3159
98	-36.3159
98.05	-36.3159
98.1	-36.4685
98.15	-36.3159
98.2	-36.6211
98.25	-36.4685
98.3	-36.4685
98.35	-36.3159
98.4	-36.1633
98.45	-36.3159
98.5	-36.3159
98.55	-36.3159
98.6	-36.4685
98.65	-36.0107
98.7	-36.1633
98.75	-36.3159
98.8	-36.3159
98.85	-36.3159
98.9	-36.4685
98.95	-36.0107
99	-36.3159
99.05	-36.1633
99.1	-36.1633
99.15	-36.3159
99.2	-36.1633
99.25	-36.1633
99.3	-36.1633
99.35	-36.0107
99.4	-36.1633
99.45	-36.3159
99.5	-36.0107
99.55	-36.0107
99.6	-36.0107
99.65	-36.1633
99.7	-35.8582
99.75	-36.0107
99.8	-36.0107
99.85	-36.0107
99.9	-36.0107
[truncated: 3,161 more rows]

## Sheet: Fig. 3A source tonic
Time(ms)	Voltage(mV)
0	-56.4575
0.05	-56.3049
0.1	-56.3049
0.15	-56.3049
0.2	-56.4575
0.25	-56.1523
0.3	-56.1523
0.35	-56.1523
0.4	-56.3049
0.45	-55.9998
0.5	-55.8472
0.55	-56.1523
0.6	-56.4575
0.65	-56.3049
0.7	-56.3049
0.75	-56.4575
0.8	-56.4575
0.85	-56.6101
0.9	-56.4575
0.95	-56.6101
1	-56.6101
1.05	-56.4575
1.1	-56.4575
1.15	-56.4575
1.2	-56.6101
1.25	-55.9998
1.3	-56.3049
1.35	-56.1523
1.4	-56.1523
1.45	-55.9998
1.5	-56.1523
1.55	-56.1523
1.6	-55.8472
1.65	-56.1523
1.7	-56.1523
1.75	-56.3049
1.8	-56.4575
1.85	-56.4575
1.9	-56.3049
1.95	-56.3049
2	-56.3049
2.05	-56.4575
2.1	-56.3049
2.15	-56.3049
2.2	-56.3049
2.25	-55.9998
2.3	-56.4575
2.35	-56.3049
2.4	-55.9998
2.45	-56.3049
2.5	-55.9998
2.55	-56.3049
2.6	-56.1523
2.65	-56.4575
2.7	-56.4575
2.75	-56.1523
2.8	-56.4575
2.85	-56.6101
2.9	-56.6101
2.95	-56.3049
3	-56.6101
3.05	-56.4575
3.1	-56.4575
3.15	-56.6101
3.2	-56.3049
3.25	-56.3049
3.3	-55.8472
3.35	-56.4575
3.4	-56.4575
3.45	-56.4575
3.5	-55.9998
3.55	-56.1523
3.6	-56.6101
3.65	-56.3049
3.7	-56.3049
3.75	-56.4575
3.8	-56.4575
3.85	-56.3049
3.9	-56.4575
3.95	-56.6101
4	-56.6101
4.05	-56.3049
4.1	-56.3049
4.15	-56.4575
4.2	-56.6101
4.25	-56.4575
4.3	-56.4575
4.35	-56.3049
4.4	-56.6101
4.45	-56.4575
4.5	-56.3049
4.55	-56.4575
4.6	-56.4575
4.65	-56.6101
4.7	-56.4575
4.75	-56.6101
4.8	-56.7627
4.85	-56.4575
4.9	-56.4575
4.95	-56.6101
5	-56.6101
5.05	-56.3049
5.1	-56.3049
5.15	-56.4575
5.2	-56.4575
5.25	-56.3049
5.3	-56.4575
5.35	-56.4575
5.4	-56.4575
5.45	-56.7627
5.5	-56.6101
5.55	-56.6101
5.6	-56.4575
5.65	-56.6101
5.7	-56.6101
5.75	-56.6101
5.8	-56.6101
5.85	-56.7627
5.9	-56.7627
5.95	-56.7627
6	-56.6101
6.05	-56.6101
6.1	-56.6101
6.15	-56.4575
6.2	-56.6101
6.25	-56.7627
6.3	-56.4575
6.35	-56.1523
6.4	-56.4575
6.45	-56.3049
6.5	-56.1523
6.55	-56.4575
6.6	-56.4575
6.65	-56.4575
6.7	-56.6101
6.75	-56.4575
6.8	-56.4575
6.85	-56.6101
6.9	-56.3049
6.95	-56.4575
7	-56.6101
7.05	-56.4575
7.1	-56.3049
7.15	-56.4575
7.2	-56.1523
7.25	-56.3049
7.3	-56.4575
7.35	-56.1523
7.4	-56.1523
7.45	-55.9998
7.5	-56.1523
7.55	-56.3049
7.6	-56.3049
7.65	-56.3049
7.7	-56.1523
7.75	-56.4575
7.8	-56.4575
7.85	-56.4575
7.9	-56.4575
7.95	-56.3049
8	-56.6101
8.05	-56.3049
8.1	-56.3049
8.15	-56.4575
8.2	-56.3049
8.25	-56.4575
8.3	-56.3049
8.35	-56.1523
8.4	-56.6101
8.45	-55.9998
8.5	-56.3049
8.55	-56.1523
8.6	-56.3049
8.65	-56.6101
8.7	-56.3049
8.75	-56.4575
8.8	-56.4575
8.85	-56.4575
8.9	-56.6101
8.95	-56.4575
9	-56.6101
9.05	-56.4575
9.1	-56.3049
9.15	-56.1523
9.2	-56.1523
9.25	-56.1523
9.3	-56.1523
9.35	-55.9998
9.4	-55.9998
9.45	-56.1523
9.5	-56.1523
9.55	-56.1523
9.6	-56.1523
9.65	-56.4575
9.7	-56.4575
9.75	-56.4575
9.8	-56.6101
9.85	-56.7627
9.9	-56.3049
9.95	-55.9998
10	-56.3049
10.05	-56.3049
10.1	-56.3049
10.15	-56.1523
10.2	-55.9998
10.25	-56.3049
10.3	-56.1523
10.35	-55.9998
10.4	-56.3049
10.45	-56.1523
10.5	-55.8472
10.55	-56.3049
10.6	-56.4575
10.65	-56.4575
10.7	-56.6101
10.75	-56.6101
10.8	-56.4575
10.85	-56.1523
10.9	-56.6101
10.95	-56.4575
11	-56.4575
11.05	-56.4575
11.1	-55.9998
11.15	-56.3049
11.2	-56.1523
11.25	-55.6946
11.3	-55.8472
11.35	-56.3049
11.4	-56.3049
11.45	-56.1523
11.5	-56.3049
11.55	-56.1523
11.6	-56.1523
11.65	-56.1523
11.7	-56.3049
11.75	-56.3049
11.8	-56.3049
11.85	-56.6101
11.9	-56.4575
11.95	-56.4575
12	-56.6101
12.05	-56.3049
12.1	-56.3049
12.15	-56.3049
12.2	-56.1523
12.25	-55.9998
12.3	-56.1523
12.35	-56.1523
12.4	-56.3049
12.45	-56.1523
12.5	-56.3049
12.55	-55.9998
12.6	-56.1523
12.65	-56.4575
12.7	-56.4575
12.75	-56.4575
12.8	-56.3049
12.85	-56.3049
12.9	-56.6101
12.95	-55.9998
13	-56.3049
13.05	-55.9998
13.1	-56.1523
13.15	-55.9998
13.2	-56.1523
13.25	-55.9998
13.3	-55.9998
13.35	-55.8472
13.4	-56.1523
13.45	-56.3049
13.5	-56.4575
13.55	-55.9998
13.6	-56.3049
13.65	-56.3049
13.7	-56.3049
13.75	-56.1523
13.8	-56.4575
13.85	-56.3049
13.9	-56.1523
13.95	-55.9998
14	-55.9998
14.05	-56.1523
14.1	-55.542
14.15	-56.1523
14.2	-55.8472
14.25	-55.8472
14.3	-55.6946
14.35	-55.6946
14.4	-55.6946
14.45	-55.9998
14.5	-55.9998
14.55	-55.9998
14.6	-56.1523
14.65	-56.1523
14.7	-56.3049
14.75	-56.3049
14.8	-56.1523
14.85	-56.1523
14.9	-55.9998
14.95	-56.3049
15	-56.1523
15.05	-56.1523
15.1	-55.9998
15.15	-56.3049
15.2	-55.8472
15.25	-56.1523
15.3	-55.9998
15.35	-55.8472
15.4	-56.1523
15.45	-55.9998
15.5	-55.8472
15.55	-55.6946
15.6	-56.3049
15.65	-56.1523
15.7	-56.3049
15.75	-56.4575
15.8	-56.3049
15.85	-56.4575
15.9	-56.4575
15.95	-56.4575
16	-56.3049
16.05	-56.3049
16.1	-55.9998
16.15	-55.9998
16.2	-56.4575
16.25	-55.9998
16.3	-55.8472
16.35	-55.6946
16.4	-56.1523
16.45	-56.1523
16.5	-56.3049
16.55	-56.3049
16.6	-56.3049
16.65	-56.3049
16.7	-56.1523
16.75	-56.3049
16.8	-56.4575
16.85	-56.4575
16.9	-56.4575
16.95	-56.3049
17	-56.4575
17.05	-56.4575
17.1	-55.9998
17.15	-55.9998
17.2	-56.3049
17.25	-56.3049
17.3	-55.9998
17.35	-55.9998
17.4	-56.1523
17.45	-56.4575
17.5	-56.6101
17.55	-56.3049
17.6	-56.3049
17.65	-56.4575
17.7	-55.9998
17.75	-56.4575
17.8	-56.6101
17.85	-56.4575
17.9	-56.6101
17.95	-56.4575
18	-56.3049
18.05	-56.1523
18.1	-56.3049
18.15	-55.9998
18.2	-56.3049
18.25	-56.4575
18.3	-56.3049
18.35	-56.3049
18.4	-56.4575
18.45	-56.3049
18.5	-56.4575
18.55	-56.6101
18.6	-56.4575
18.65	-56.4575
18.7	-56.6101
18.75	-56.6101
18.8	-56.4575
18.85	-56.3049
18.9	-56.4575
18.95	-56.4575
19	-56.1523
19.05	-56.3049
19.1	-56.1523
19.15	-55.8472
19.2	-56.4575
19.25	-56.1523
19.3	-56.3049
19.35	-56.6101
19.4	-56.3049
19.45	-56.6101
19.5	-56.4575
19.55	-56.4575
19.6	-56.6101
19.65	-56.9153
19.7	-56.6101
19.75	-56.6101
19.8	-56.6101
19.85	-56.6101
19.9	-56.4575
19.95	-56.3049
20	-56.3049
20.05	-56.4575
20.1	-56.4575
20.15	-56.1523
20.2	-56.3049
20.25	-56.3049
20.3	-56.3049
20.35	-56.3049
20.4	-56.6101
20.45	-56.4575
20.5	-56.6101
20.55	-56.4575
20.6	-56.9153
20.65	-57.0679
20.7	-56.6101
20.75	-56.7627
20.8	-56.7627
20.85	-56.4575
20.9	-56.4575
20.95	-56.3049
21	-56.4575
21.05	-56.3049
21.1	-56.4575
21.15	-56.1523
21.2	-56.3049
21.25	-56.3049
21.3	-55.8472
21.35	-56.6101
21.4	-56.4575
21.45	-56.4575
21.5	-56.6101
21.55	-56.4575
21.6	-56.6101
21.65	-56.4575
21.7	-56.7627
21.75	-56.4575
21.8	-56.4575
21.85	-56.6101
21.9	-56.6101
21.95	-56.6101
22	-56.6101
22.05	-56.4575
22.1	-56.3049
22.15	-56.4575
22.2	-56.6101
22.25	-56.4575
22.3	-56.3049
22.35	-56.4575
22.4	-56.4575
22.45	-56.4575
22.5	-56.6101
22.55	-56.6101
22.6	-56.6101
22.65	-56.6101
22.7	-56.6101
22.75	-56.4575
22.8	-56.9153
22.85	-56.3049
22.9	-56.4575
22.95	-56.3049
23	-56.4575
23.05	-56.4575
23.1	-56.4575
23.15	-56.4575
23.2	-56.6101
23.25	-56.4575
23.3	-56.6101
23.35	-56.6101
23.4	-56.7627
23.45	-56.7627
23.5	-56.4575
23.55	-56.7627
23.6	-56.4575
23.65	-56.7627
23.7	-56.6101
23.75	-56.6101
23.8	-56.6101
23.85	-56.4575
23.9	-56.3049
23.95	-56.3049
24	-56.3049
24.05	-56.1523
24.1	-56.1523
24.15	-56.1523
24.2	-56.3049
24.25	-56.4575
24.3	-56.4575
24.35	-56.6101
24.4	-56.4575
24.45	-56.6101
24.5	-56.4575
24.55	-56.9153
24.6	-56.6101
24.65	-56.4575
24.7	-56.6101
24.75	-56.4575
24.8	-56.4575
24.85	-56.4575
24.9	-55.8472
24.95	-56.4575
25	-56.1523
25.05	-56.1523
25.1	-56.1523
25.15	-56.1523
25.2	-55.8472
25.25	-55.8472
25.3	-56.1523
25.35	-56.1523
25.4	-55.9998
25.45	-55.9998
25.5	-56.1523
25.55	-56.3049
25.6	-56.4575
25.65	-56.1523
25.7	-56.3049
25.75	-56.4575
25.8	-56.4575
25.85	-56.1523
25.9	-55.9998
25.95	-56.3049
26	-55.9998
26.05	-55.9998
26.1	-56.3049
26.15	-55.8472
26.2	-55.8472
26.25	-55.9998
26.3	-56.3049
26.35	-56.3049
26.4	-56.6101
26.45	-56.3049
26.5	-56.1523
26.55	-56.3049
26.6	-56.1523
26.65	-56.3049
26.7	-56.1523
26.75	-56.1523
26.8	-55.8472
26.85	-55.8472
26.9	-55.8472
26.95	-55.9998
27	-55.6946
27.05	-55.6946
27.1	-55.8472
27.15	-55.8472
27.2	-55.8472
27.25	-55.6946
27.3	-55.9998
27.35	-55.8472
27.4	-55.9998
27.45	-56.1523
27.5	-56.1523
27.55	-56.3049
27.6	-55.9998
27.65	-56.1523
27.7	-56.1523
27.75	-56.1523
27.8	-56.3049
27.85	-56.3049
27.9	-55.8472
27.95	-55.6946
28	-55.9998
28.05	-55.8472
28.1	-55.8472
28.15	-55.542
28.2	-55.6946
28.25	-55.6946
28.3	-55.6946
28.35	-55.8472
28.4	-55.9998
28.45	-56.1523
28.5	-55.542
28.55	-56.3049
28.6	-56.3049
28.65	-56.1523
28.7	-55.9998
28.75	-55.9998
28.8	-55.8472
28.85	-55.8472
28.9	-55.8472
28.95	-55.542
29	-55.6946
29.05	-55.6946
29.1	-55.6946
29.15	-55.542
29.2	-55.3894
29.25	-54.7791
29.3	-54.3213
29.35	-53.5583
29.4	-53.1006
29.45	-52.7954
29.5	-52.0325
29.55	-51.8799
29.6	-50.9644
29.65	-50.354
29.7	-50.2014
29.75	-49.5911
29.8	-49.1333
29.85	-48.3704
29.9	-48.0652
29.95	-47.1497
30	-46.8445
30.05	-46.3867
30.1	-45.929
30.15	-45.4712
30.2	-44.7083
30.25	-44.5557
30.3	-43.7927
30.35	-43.4875
30.4	-42.8772
30.45	-42.1143
30.5	-41.3513
30.55	-40.5884
30.6	-39.6729
30.65	-38.2996
30.7	-36.3159
30.75	-33.2642
30.8	-28.9917
30.85	-21.5149
30.9	-12.3596
30.95	-3.20435
31	4.11987
31.05	10.376
31.1	14.9536
31.15	19.0735
31.2	21.9727
31.25	23.6511
31.3	23.0408
31.35	20.752
31.4	17.395
31.45	12.8174
31.5	8.39233
31.55	3.20435
31.6	-2.28882
31.65	-7.93457
31.7	-13.7329
31.75	-19.3787
31.8	-25.0244
31.85	-29.9072
31.9	-34.79
31.95	-39.2151
32	-43.0298
32.05	-46.6919
32.1	-49.8962
32.15	-52.7954
32.2	-54.9316
32.25	-57.0679
32.3	-59.2041
32.35	-60.5774
32.4	-61.9507
32.45	-62.7136
32.5	-63.4766
32.55	-64.2395
32.6	-64.3921
32.65	-64.5447
32.7	-64.5447
32.75	-64.5447
32.8	-64.0869
32.85	-63.9343
32.9	-63.6292
32.95	-63.0188
33	-62.561
33.05	-62.1033
33.1	-61.6455
33.15	-61.0352
33.2	-60.5774
33.25	-60.1196
33.3	-59.5093
33.35	-59.2041
33.4	-58.8989
33.45	-58.2886
33.5	-57.9834
33.55	-57.0679
33.6	-56.9153
33.65	-56.7627
33.7	-56.1523
33.75	-55.9998
33.8	-55.542
33.85	-54.7791
33.9	-54.4739
33.95	-54.4739
34	-54.1687
34.05	-53.5583
34.1	-53.2532
34.15	-52.948
34.2	-52.6428
34.25	-52.4902
34.3	-52.3376
34.35	-52.3376
34.4	-52.0325
34.45	-51.8799
34.5	-51.8799
34.55	-51.2695
34.6	-51.1169
34.65	-50.9644
34.7	-50.354
34.75	-50.6592
34.8	-50.354
34.85	-49.7437
34.9	-49.5911
34.95	-49.4385
35	-48.8281
35.05	-48.8281
35.1	-48.5229
35.15	-48.6755
35.2	-48.3704
35.25	-48.0652
35.3	-48.0652
35.35	-47.76
35.4	-47.4548
35.45	-47.4548
35.5	-47.3022
35.55	-47.1497
35.6	-46.9971
35.65	-46.6919
35.7	-46.3867
35.75	-45.929
35.8	-45.6238
35.85	-45.7764
35.9	-45.6238
35.95	-45.4712
36	-45.166
36.05	-44.7083
36.1	-44.7083
36.15	-44.5557
36.2	-44.4031
36.25	-43.9453
36.3	-43.7927
36.35	-43.6401
36.4	-43.6401
36.45	-43.0298
36.5	-43.0298
36.55	-42.2668
36.6	-42.1143
36.65	-41.9617
36.7	-41.3513
36.75	-40.8936
36.8	-40.4358
36.85	-39.978
36.9	-39.5203
36.95	-38.9099
37	-37.9944
37.05	-36.4685
37.1	-34.4849
37.15	-31.1279
37.2	-25.4822
37.25	-18.0054
37.3	-9.91821
37.35	-2.13623
37.4	4.42505
37.45	9.76562
37.5	13.8855
37.55	16.7847
37.6	18.6157
37.65	19.0735
37.7	18.158
37.75	15.8691
37.8	12.6648
37.85	8.8501
37.9	4.27246
37.95	-0.305176
38	-4.88281
38.05	-10.2234
38.1	-15.7166
38.15	-20.5994
38.2	-25.9399
38.25	-30.5176
38.3	-35.0952
38.35	-39.0625
38.4	-43.0298
38.45	-46.2341
38.5	-48.9807
38.55	-51.5747
38.6	-54.0161
38.65	-56.3049
38.7	-57.9834
38.75	-59.2041
38.8	-60.4248
38.85	-60.73
38.9	-61.4929
38.95	-61.9507
39	-62.4084
39.05	-62.2559
39.1	-62.4084
39.15	-62.4084
39.2	-62.2559
39.25	-62.1033
39.3	-62.1033
39.35	-61.6455
39.4	-61.3403
39.45	-61.3403
39.5	-60.73
39.55	-60.4248
39.6	-60.1196
39.65	-59.5093
39.7	-58.8989
39.75	-58.5938
39.8	-57.9834
39.85	-57.5256
39.9	-57.2205
39.95	-56.6101
40	-56.1523
40.05	-55.3894
40.1	-55.542
40.15	-55.3894
40.2	-54.9316
40.25	-54.6265
40.3	-54.4739
40.35	-53.8635
40.4	-53.8635
40.45	-53.2532
40.5	-53.1006
40.55	-52.7954
40.6	-52.6428
40.65	-52.4902
40.7	-51.8799
40.75	-51.7273
40.8	-51.1169
40.85	-50.9644
40.9	-50.9644
40.95	-50.9644
41	-50.5066
41.05	-50.354
41.1	-50.354
41.15	-50.0488
41.2	-50.0488
41.25	-49.8962
41.3	-49.5911
41.35	-49.4385
41.4	-49.2859
41.45	-49.1333
41.5	-49.1333
41.55	-49.2859
41.6	-48.3704
41.65	-48.2178
41.7	-48.0652
41.75	-47.9126
41.8	-47.4548
41.85	-47.3022
41.9	-47.3022
41.95	-46.9971
42	-46.8445
42.05	-46.6919
42.1	-46.5393
42.15	-46.3867
42.2	-46.5393
42.25	-46.2341
42.3	-46.0815
42.35	-46.0815
42.4	-45.6238
42.45	-45.4712
42.5	-45.4712
42.55	-45.166
42.6	-44.8608
42.65	-44.5557
42.7	-44.4031
42.75	-43.9453
42.8	-44.0979
42.85	-43.7927
42.9	-43.4875
42.95	-43.4875
43	-43.335
43.05	-42.8772
43.1	-42.7246
43.15	-42.4194
43.2	-42.2668
43.25	-41.9617
43.3	-41.9617
43.35	-41.5039
43.4	-41.3513
43.45	-40.8936
43.5	-40.2832
43.55	-39.978
43.6	-39.3677
43.65	-38.4521
43.7	-38.147
43.75	-36.7737
43.8	-35.4004
43.85	-33.1116
43.9	-29.2969
43.95	-23.1934
44	-15.8691
44.05	-7.62939
44.1	-0.152588
44.15	5.64575
44.2	10.8337
44.25	14.801
44.3	17.0898
44.35	18.6157
44.4	18.6157
44.45	17.395
44.5	14.9536
44.55	11.7493
44.6	7.78198
44.65	3.66211
44.7	-0.915527
44.75	-5.95093
44.8	-11.1389
44.85	-16.1743
44.9	-21.0571
44.95	-25.7874
45	-30.6702
45.05	-34.9426
45.1	-38.7573
45.15	-42.8772
45.2	-45.7764
45.25	-48.8281
45.3	-51.2695
45.35	-53.5583
45.4	-55.3894
45.45	-57.0679
45.5	-58.5938
45.55	-59.6619
45.6	-60.4248
45.65	-61.3403
45.7	-61.7981
45.75	-61.9507
45.8	-62.1033
45.85	-62.1033
45.9	-62.4084
45.95	-62.2559
46	-62.2559
46.05	-62.1033
46.1	-61.9507
46.15	-61.3403
46.2	-61.1877
46.25	-60.73
46.3	-60.4248
46.35	-59.967
46.4	-59.5093
46.45	-58.8989
46.5	-58.5938
46.55	-58.136
46.6	-57.8308
46.65	-56.9153
46.7	-56.7627
46.75	-56.3049
46.8	-55.9998
46.85	-55.542
46.9	-55.3894
46.95	-55.0842
47	-54.7791
47.05	-54.4739
47.1	-54.1687
47.15	-53.7109
47.2	-53.5583
47.25	-53.2532
47.3	-53.2532
47.35	-53.1006
47.4	-52.4902
47.45	-52.3376
47.5	-52.0325
47.55	-51.8799
47.6	-51.5747
47.65	-51.4221
47.7	-51.1169
47.75	-50.9644
47.8	-50.8118
47.85	-50.5066
47.9	-50.5066
47.95	-50.354
48	-50.2014
48.05	-50.2014
48.1	-50.0488
48.15	-49.7437
48.2	-49.5911
48.25	-49.5911
48.3	-49.2859
48.35	-48.9807
48.4	-48.5229
48.45	-48.2178
48.5	-47.9126
48.55	-47.9126
48.6	-47.76
48.65	-47.6074
48.7	-46.9971
48.75	-47.3022
48.8	-47.1497
48.85	-46.9971
48.9	-46.6919
48.95	-46.6919
49	-46.2341
49.05	-46.0815
49.1	-46.0815
49.15	-45.7764
49.2	-45.7764
49.25	-45.4712
49.3	-45.4712
49.35	-45.166
49.4	-44.5557
49.45	-44.2505
49.5	-44.0979
49.55	-44.0979
49.6	-43.9453
49.65	-43.4875
49.7	-43.335
49.75	-43.1824
49.8	-43.0298
49.85	-42.7246
49.9	-42.7246
49.95	-42.4194
50	-42.2668
50.05	-41.9617
50.1	-41.5039
50.15	-41.0461
50.2	-41.0461
50.25	-40.1306
50.3	-39.978
50.35	-39.6729
50.4	-39.0625
50.45	-38.4521
50.5	-37.5366
50.55	-36.6211
50.6	-34.9426
50.65	-32.3486
50.7	-28.5339
50.75	-21.9727
50.8	-14.4958
50.85	-6.2561
50.9	0.762939
50.95	6.86646
51	11.9019
51.05	15.4114
51.1	18.0054
51.15	19.2261
51.2	19.3787
51.25	17.7002
51.3	15.2588
51.35	12.0544
51.4	8.08716
51.45	3.66211
51.5	-0.915527
51.55	-5.79834
51.6	-10.9863
51.65	-16.1743
51.7	-20.752
51.75	-25.6348
51.8	-30.5176
51.85	-34.6375
51.9	-38.6047
51.95	-42.2668
52	-45.4712
52.05	-48.3704
52.1	-50.9644
52.15	-53.2532
52.2	-55.3894
52.25	-56.7627
52.3	-57.9834
52.35	-59.2041
52.4	-60.1196
52.45	-60.8826
52.5	-61.3403
52.55	-61.7981
52.6	-61.7981
52.65	-61.9507
52.7	-61.9507
52.75	-61.9507
52.8	-61.9507
52.85	-61.4929
52.9	-61.4929
52.95	-61.0352
53	-60.73
53.05	-60.2722
53.1	-59.8145
53.15	-59.6619
53.2	-58.7463
53.25	-58.4412
53.3	-57.9834
53.35	-57.5256
53.4	-56.9153
53.45	-56.4575
53.5	-55.9998
53.55	-55.6946
53.6	-55.3894
53.65	-55.2368
53.7	-54.7791
53.75	-54.6265
53.8	-54.6265
53.85	-54.0161
53.9	-53.8635
53.95	-53.8635
54	-53.4058
54.05	-53.1006
54.1	-52.7954
54.15	-52.4902
54.2	-52.3376
54.25	-52.1851
54.3	-51.7273
54.35	-51.2695
54.4	-51.4221
54.45	-50.9644
54.5	-50.5066
54.55	-50.354
54.6	-50.0488
54.65	-50.2014
54.7	-49.8962
54.75	-49.7437
54.8	-49.5911
54.85	-49.2859
54.9	-49.5911
54.95	-49.2859
55	-49.1333
55.05	-48.9807
55.1	-48.8281
55.15	-48.5229
55.2	-48.5229
55.25	-48.5229
55.3	-48.0652
55.35	-47.9126
55.4	-47.6074
55.45	-47.3022
55.5	-47.1497
55.55	-47.1497
55.6	-46.9971
55.65	-46.6919
55.7	-46.5393
55.75	-46.2341
55.8	-46.3867
55.85	-46.0815
55.9	-45.7764
55.95	-45.7764
56	-45.6238
56.05	-45.6238
56.1	-45.3186
56.15	-45.3186
56.2	-44.7083
56.25	-44.7083
56.3	-44.5557
56.35	-44.4031
56.4	-43.9453
56.45	-43.7927
56.5	-43.335
56.55	-43.335
56.6	-43.335
56.65	-42.8772
56.7	-42.572
56.75	-42.572
56.8	-42.2668
56.85	-41.8091
56.9	-41.8091
56.95	-41.5039
57	-40.8936
57.05	-40.5884
57.1	-39.978
57.15	-39.6729
57.2	-39.0625
57.25	-38.4521
57.3	-37.384
57.35	-36.1633
57.4	-34.79
57.45	-31.4331
57.5	-27.1606
57.55	-20.2942
57.6	-12.207
57.65	-4.57764
57.7	2.28882
57.75	7.93457
57.8	12.97
57.85	16.1743
57.9	18.158
57.95	19.3787
58	19.2261
58.05	17.8528
58.1	15.4114
58.15	12.207
58.2	8.39233
58.25	4.11987
58.3	-0.457764
58.35	-5.49316
58.4	-10.0708
58.45	-15.2588
58.5	-20.1416
58.55	-25.0244
58.6	-29.4495
58.65	-33.7219
58.7	-37.5366
58.75	-40.8936
58.8	-44.8608
58.85	-47.9126
58.9	-49.8962
58.95	-52.1851
59	-54.0161
59.05	-55.6946
59.1	-57.0679
59.15	-58.2886
59.2	-59.0515
59.25	-59.8145
59.3	-60.5774
59.35	-60.8826
59.4	-61.0352
59.45	-61.3403
59.5	-60.73
59.55	-61.4929
59.6	-61.1877
59.65	-60.8826
59.7	-60.73
59.75	-60.73
59.8	-60.2722
59.85	-59.8145
59.9	-59.5093
59.95	-59.0515
60	-58.5938
60.05	-58.4412
60.1	-58.136
60.15	-57.0679
60.2	-56.9153
60.25	-56.6101
60.3	-55.8472
60.35	-55.6946
60.4	-55.3894
60.45	-55.2368
60.5	-54.6265
60.55	-54.1687
60.6	-54.1687
60.65	-54.0161
60.7	-53.5583
60.75	-53.4058
60.8	-53.4058
60.85	-53.1006
60.9	-52.948
60.95	-52.4902
61	-52.4902
61.05	-52.1851
61.1	-52.0325
61.15	-51.7273
61.2	-51.2695
61.25	-50.9644
61.3	-50.8118
61.35	-50.6592
61.4	-50.2014
61.45	-50.5066
61.5	-50.2014
61.55	-49.7437
61.6	-49.7437
61.65	-49.4385
61.7	-49.4385
61.75	-49.2859
61.8	-49.1333
61.85	-49.2859
61.9	-48.9807
61.95	-48.6755
62	-48.6755
62.05	-48.5229
62.1	-48.5229
62.15	-48.5229
62.2	-48.0652
62.25	-47.9126
62.3	-47.6074
62.35	-47.6074
62.4	-47.4548
62.45	-47.1497
62.5	-46.8445
62.55	-46.6919
62.6	-46.6919
62.65	-46.5393
62.7	-46.2341
62.75	-46.0815
62.8	-45.929
62.85	-45.7764
62.9	-45.929
62.95	-45.6238
63	-45.4712
63.05	-45.3186
63.1	-44.8608
63.15	-45.0134
63.2	-44.7083
63.25	-44.5557
63.3	-44.4031
63.35	-44.0979
63.4	-44.0979
63.45	-43.6401
63.5	-43.7927
63.55	-43.4875
63.6	-43.335
63.65	-43.1824
63.7	-43.0298
63.75	-42.8772
63.8	-42.4194
63.85	-42.4194
63.9	-41.9617
63.95	-41.8091
64	-41.3513
64.05	-41.3513
64.1	-40.5884
64.15	-39.978
64.2	-39.8254
64.25	-39.3677
64.3	-39.0625
64.35	-38.6047
64.4	-37.8418
64.45	-37.2314
64.5	-36.1633
64.55	-34.3323
64.6	-32.196
64.65	-27.4658
64.7	-21.2097
64.75	-13.7329
64.8	-5.49316
64.85	1.37329
64.9	7.01904
64.95	11.7493
65	15.2588
65.05	17.7002
65.1	19.0735
65.15	18.7683
65.2	17.5476
65.25	15.2588
65.3	12.207
65.35	8.54492
65.4	4.27246
65.45	-0.152588
65.5	-4.73022
65.55	-9.76562
65.6	-14.801
65.65	-19.3787
65.7	-24.2615
65.75	-28.8391
65.8	-32.959
65.85	-37.0789
65.9	-40.741
65.95	-43.9453
66	-47.1497
66.05	-49.8962
66.1	-51.8799
66.15	-53.7109
66.2	-55.542
66.25	-56.6101
66.3	-58.2886
66.35	-58.8989
66.4	-59.6619
66.45	-60.1196
66.5	-60.73
66.55	-60.8826
66.6	-61.3403
66.65	-61.3403
66.7	-60.8826
66.75	-61.3403
66.8	-61.3403
66.85	-61.0352
66.9	-60.5774
66.95	-60.4248
67	-59.967
67.05	-59.3567
67.1	-59.2041
67.15	-58.8989
67.2	-58.2886
67.25	-57.8308
67.3	-57.5256
67.35	-56.9153
67.4	-56.6101
67.45	-56.1523
67.5	-55.8472
67.55	-55.6946
67.6	-55.3894
67.65	-55.2368
67.7	-55.0842
67.75	-54.4739
67.8	-54.3213
67.85	-54.0161
67.9	-53.8635
67.95	-53.8635
68	-53.2532
68.05	-52.948
68.1	-52.7954
68.15	-52.0325
68.2	-52.1851
68.25	-51.8799
68.3	-51.4221
68.35	-51.1169
68.4	-50.8118
68.45	-50.8118
68.5	-50.6592
68.55	-50.5066
68.6	-50.0488
68.65	-50.0488
68.7	-50.2014
68.75	-50.0488
68.8	-49.7437
68.85	-49.4385
68.9	-49.4385
68.95	-49.4385
69	-49.1333
69.05	-49.1333
69.1	-48.9807
69.15	-48.5229
69.2	-48.2178
69.25	-48.2178
69.3	-48.0652
69.35	-47.76
69.4	-47.6074
69.45	-47.4548
69.5	-47.1497
69.55	-47.3022
69.6	-47.1497
69.65	-47.1497
69.7	-46.8445
69.75	-46.6919
69.8	-46.5393
69.85	-46.3867
69.9	-46.0815
69.95	-45.929
70	-45.7764
70.05	-45.6238
70.1	-45.4712
70.15	-45.166
70.2	-44.8608
70.25	-44.8608
70.3	-44.2505
70.35	-44.4031
70.4	-44.2505
70.45	-43.7927
70.5	-43.9453
70.55	-43.7927
70.6	-43.335
70.65	-43.1824
70.7	-43.335
70.75	-43.0298
70.8	-42.572
70.85	-42.4194
70.9	-41.9617
70.95	-41.8091
71	-41.0461
71.05	-40.741
71.1	-40.5884
71.15	-39.978
71.2	-39.5203
71.25	-38.9099
71.3	-38.4521
71.35	-37.384
71.4	-36.6211
71.45	-35.0952
71.5	-32.959
71.55	-29.2969
71.6	-23.3459
71.65	-16.0217
71.7	-7.93457
71.75	-0.152588
71.8	5.49316
71.85	10.8337
71.9	14.3433
71.95	17.2424
72	19.0735
72.05	19.3787
72.1	18.3105
72.15	16.1743
72.2	13.4277
72.25	9.76562
72.3	5.95093
72.35	1.67847
72.4	-3.20435
72.45	-7.78198
72.5	-12.5122
72.55	-17.5476
72.6	-22.2778
72.65	-26.8555
72.7	-31.1279
72.75	-34.9426
72.8	-38.7573
72.85	-42.1143
72.9	-45.166
72.95	-47.9126
73	-50.6592
73.05	-52.4902
73.1	-54.4739
73.15	-55.6946
73.2	-56.7627
73.25	-58.2886
73.3	-58.5938
73.35	-59.6619
73.4	-60.2722
73.45	-60.4248
73.5	-60.5774
73.55	-60.8826
73.6	-60.8826
73.65	-60.73
73.7	-60.73
73.75	-60.73
73.8	-60.2722
73.85	-60.2722
73.9	-59.6619
73.95	-59.2041
74	-58.7463
74.05	-58.4412
74.1	-58.2886
74.15	-57.5256
74.2	-56.9153
74.25	-56.6101
74.3	-56.3049
74.35	-55.6946
74.4	-55.3894
74.45	-55.0842
74.5	-55.0842
74.55	-54.6265
74.6	-54.3213
74.65	-54.1687
74.7	-54.1687
74.75	-53.4058
74.8	-53.4058
74.85	-53.1006
74.9	-52.7954
74.95	-52.4902
75	-52.0325
75.05	-52.0325
75.1	-51.5747
75.15	-51.5747
75.2	-51.1169
75.25	-50.9644
75.3	-50.8118
75.35	-50.5066
75.4	-50.5066
75.45	-50.354
75.5	-49.8962
75.55	-49.8962
75.6	-49.7437
75.65	-49.7437
75.7	-49.4385
75.75	-49.4385
75.8	-49.4385
75.85	-49.4385
75.9	-49.1333
75.95	-49.1333
76	-48.6755
76.05	-48.5229
76.1	-48.5229
76.15	-48.2178
76.2	-47.9126
76.25	-47.4548
76.3	-47.76
76.35	-47.4548
76.4	-47.4548
76.45	-47.1497
76.5	-46.8445
76.55	-46.8445
76.6	-46.8445
76.65	-46.5393
76.7	-46.2341
76.75	-46.3867
76.8	-45.7764
76.85	-46.2341
76.9	-45.929
76.95	-45.7764
77	-45.7764
77.05	-45.4712
77.1	-45.0134
77.15	-45.0134
77.2	-44.8608
77.25	-44.8608
77.3	-44.5557
77.35	-44.2505
77.4	-44.2505
77.45	-43.9453
77.5	-43.7927
77.55	-43.4875
77.6	-43.1824
77.65	-43.1824
77.7	-42.8772
77.75	-43.0298
77.8	-42.572
77.85	-42.2668
77.9	-41.9617
77.95	-41.8091
78	-41.5039
78.05	-41.5039
78.1	-41.0461
78.15	-40.8936
78.2	-40.4358
78.25	-39.6729
78.3	-39.8254
78.35	-38.9099
78.4	-38.6047
78.45	-37.9944
78.5	-36.9263
78.55	-35.4004
78.6	-33.2642
78.65	-30.365
78.7	-24.5667
78.75	-17.5476
78.8	-9.46045
78.85	-1.67847
78.9	4.57764
78.95	9.91821
79	14.0381
79.05	17.2424
79.1	19.3787
79.15	19.989
79.2	19.3787
79.25	17.7002
79.3	14.801
79.35	11.2915
79.4	7.47681
79.45	3.20435
79.5	-1.52588
79.55	-6.2561
79.6	-11.4441
79.65	-16.4795
79.7	-21.5149
79.75	-26.2451
79.8	-30.365
79.85	-34.6375
79.9	-38.147
79.95	-41.8091
80	-44.8608
80.05	-47.6074
80.1	-50.0488
80.15	-52.0325
80.2	-53.8635
80.25	-55.6946
80.3	-56.9153
80.35	-58.136
80.4	-58.5938
80.45	-59.6619
80.5	-60.1196
80.55	-60.4248
80.6	-60.5774
80.65	-61.1877
80.7	-60.8826
80.75	-60.8826
80.8	-60.8826
80.85	-60.4248
80.9	-60.4248
80.95	-60.1196
81	-59.8145
81.05	-59.2041
81.1	-58.8989
81.15	-58.136
81.2	-57.9834
81.25	-57.5256
81.3	-57.0679
81.35	-56.6101
81.4	-56.3049
81.45	-55.9998
81.5	-55.6946
81.55	-55.3894
81.6	-55.0842
81.65	-54.6265
81.7	-54.4739
81.75	-54.0161
81.8	-54.0161
81.85	-53.2532
81.9	-53.4058
81.95	-52.6428
82	-52.7954
82.05	-52.4902
82.1	-52.0325
82.15	-51.8799
82.2	-51.7273
82.25	-51.5747
82.3	-51.1169
82.35	-50.8118
82.4	-50.6592
82.45	-50.5066
82.5	-50.5066
82.55	-49.8962
82.6	-50.2014
82.65	-49.8962
82.7	-49.7437
82.75	-49.7437
82.8	-49.2859
82.85	-49.1333
82.9	-49.2859
82.95	-48.9807
83	-48.5229
83.05	-48.3704
83.1	-48.2178
83.15	-47.9126
83.2	-47.76
83.25	-47.6074
83.3	-47.4548
83.35	-47.4548
83.4	-47.1497
83.45	-46.9971
83.5	-46.6919
83.55	-46.9971
83.6	-46.5393
83.65	-46.5393
83.7	-46.5393
83.75	-46.0815
83.8	-45.929
83.85	-45.929
83.9	-45.4712
83.95	-45.4712
84	-44.8608
84.05	-45.0134
84.1	-45.0134
84.15	-44.7083
84.2	-44.4031
84.25	-44.2505
84.3	-44.0979
84.35	-43.6401
84.4	-43.7927
84.45	-43.6401
84.5	-43.4875
84.55	-43.335
84.6	-43.0298
84.65	-42.7246
84.7	-42.572
84.75	-42.1143
84.8	-41.8091
84.85	-41.3513
84.9	-40.8936
84.95	-40.4358
85	-39.978
85.05	-39.3677
85.1	-38.9099
85.15	-37.9944
85.2	-37.384
85.25	-36.0107
85.3	-34.4849
85.35	-32.0435
85.4	-27.9236
85.45	-21.3623
85.5	-14.0381
85.55	-5.79834
85.6	1.2207
85.65	7.01904
85.7	11.9019
85.75	15.564
85.8	18.0054
85.85	19.6838
85.9	19.6838
85.95	18.6157
86	16.3269
86.05	13.5803
86.1	9.91821
86.15	6.10352
86.2	1.67847
86.25	-2.89917
86.3	-7.47681
86.35	-12.8174
86.4	-17.7002
86.45	-22.583
86.5	-26.8555
86.55	-31.1279
86.6	-35.2478
86.65	-39.0625
86.7	-42.4194
86.75	-45.3186
86.8	-48.0652
86.85	-50.5066
86.9	-52.3376
86.95	-54.1687
87	-55.6946
87.05	-56.7627
87.1	-57.5256
87.15	-58.5938
87.2	-59.3567
87.25	-59.8145
87.3	-60.1196
87.35	-60.4248
87.4	-60.2722
87.45	-60.5774
87.5	-60.4248
87.55	-60.2722
87.6	-59.6619
87.65	-59.8145
87.7	-59.8145
87.75	-59.5093
87.8	-58.8989
87.85	-58.7463
87.9	-57.9834
87.95	-57.373
88	-57.5256
88.05	-56.6101
88.1	-56.1523
88.15	-55.6946
88.2	-55.542
88.25	-55.0842
88.3	-54.6265
88.35	-54.4739
88.4	-53.8635
88.45	-54.0161
88.5	-53.5583
88.55	-53.2532
88.6	-53.1006
88.65	-52.7954
88.7	-52.7954
88.75	-52.3376
88.8	-52.0325
88.85	-51.7273
88.9	-51.4221
88.95	-51.1169
89	-50.8118
89.05	-50.6592
89.1	-50.5066
89.15	-50.354
89.2	-50.2014
89.25	-49.8962
89.3	-49.5911
89.35	-49.7437
89.4	-49.2859
89.45	-49.2859
89.5	-48.9807
89.55	-48.9807
89.6	-48.9807
89.65	-48.6755
89.7	-48.6755
89.75	-48.5229
89.8	-48.0652
89.85	-48.0652
89.9	-47.6074
89.95	-47.76
90	-47.4548
90.05	-47.1497
90.1	-46.6919
90.15	-46.8445
90.2	-46.6919
90.25	-46.6919
90.3	-46.3867
90.35	-46.3867
90.4	-46.0815
90.45	-45.929
90.5	-46.0815
90.55	-46.3867
90.6	-45.6238
90.65	-45.166
90.7	-45.3186
90.75	-45.4712
90.8	-45.166
90.85	-44.8608
90.9	-44.8608
90.95	-44.4031
91	-44.2505
91.05	-44.0979
91.1	-44.0979
91.15	-43.9453
91.2	-43.335
91.25	-43.4875
91.3	-43.6401
91.35	-43.335
91.4	-43.1824
91.45	-43.0298
91.5	-42.7246
91.55	-42.4194
91.6	-42.4194
91.65	-42.1143
91.7	-41.8091
91.75	-41.3513
91.8	-41.0461
91.85	-40.8936
91.9	-40.5884
91.95	-40.1306
92	-39.5203
92.05	-39.5203
92.1	-38.9099
92.15	-38.4521
92.2	-37.6892
92.25	-36.9263
92.3	-35.7056
92.35	-33.7219
92.4	-30.365
92.45	-25.177
92.5	-18.0054
92.55	-9.91821
92.6	-2.44141
92.65	4.42505
92.7	9.15527
92.75	13.5803
92.8	16.6321
92.85	18.9209
92.9	19.8364
92.95	19.3787
93	17.8528
93.05	15.1062
93.1	12.0544
93.15	8.39233
93.2	3.96729
93.25	-0.305176
93.3	-5.0354
93.35	-10.2234
93.4	-14.6484
93.45	-19.3787
93.5	-24.1089
93.55	-28.8391
93.6	-32.959
93.65	-36.4685
93.7	-39.8254
93.75	-43.1824
93.8	-46.2341
93.85	-48.5229
93.9	-50.6592
93.95	-52.7954
94	-54.1687
94.05	-55.6946
94.1	-56.9153
94.15	-57.9834
94.2	-58.4412
94.25	-59.3567
94.3	-59.8145
94.35	-59.967
94.4	-60.2722
94.45	-60.4248
94.5	-60.5774
94.55	-60.2722
94.6	-60.2722
94.65	-59.967
94.7	-59.8145
94.75	-59.6619
94.8	-59.3567
94.85	-59.0515
94.9	-58.2886
94.95	-57.8308
95	-57.2205
95.05	-56.9153
95.1	-56.4575
95.15	-55.9998
95.2	-55.542
95.25	-55.0842
95.3	-54.7791
95.35	-54.4739
95.4	-54.1687
95.45	-54.0161
95.5	-53.5583
95.55	-53.7109
95.6	-53.4058
95.65	-52.948
95.7	-52.6428
95.75	-52.4902
95.8	-52.1851
95.85	-51.8799
95.9	-51.4221
95.95	-51.2695
96	-51.1169
96.05	-50.9644
96.1	-50.5066
96.15	-50.5066
96.2	-50.2014
96.25	-49.2859
96.3	-49.7437
96.35	-49.7437
96.4	-49.2859
96.45	-49.1333
96.5	-49.1333
96.55	-48.9807
96.6	-48.9807
96.65	-48.6755
96.7	-48.5229
96.75	-48.5229
96.8	-48.3704
96.85	-48.2178
96.9	-48.2178
96.95	-47.3022
97	-46.9971
97.05	-47.1497
97.1	-47.1497
97.15	-46.8445
97.2	-46.5393
97.25	-46.3867
97.3	-46.0815
97.35	-46.0815
97.4	-46.0815
97.45	-45.7764
97.5	-45.929
97.55	-45.6238
97.6	-45.4712
97.65	-45.166
97.7	-45.0134
97.75	-45.4712
97.8	-44.8608
97.85	-44.5557
97.9	-44.5557
97.95	-44.4031
98	-44.0979
98.05	-43.9453
98.1	-43.4875
98.15	-43.335
98.2	-43.335
98.25	-43.0298
98.3	-42.8772
98.35	-42.572
98.4	-42.4194
98.45	-42.4194
98.5	-42.1143
98.55	-41.8091
98.6	-41.8091
98.65	-41.0461
98.7	-40.8936
98.75	-40.2832
98.8	-39.978
98.85	-39.8254
98.9	-39.0625
98.95	-38.6047
99	-37.6892
99.05	-37.0789
99.1	-35.8582
99.15	-34.6375
99.2	-32.0435
99.25	-27.4658
99.3	-21.0571
99.35	-13.4277
99.4	-5.49316
99.45	1.83105
99.5	7.17163
99.55	12.0544
99.6	15.8691
99.65	18.6157
99.7	19.989
99.75	20.2942
99.8	19.0735
99.85	17.395
99.9	13.8855
[truncated: 3,161 more rows]

## Sheet: Fig.3B Pie chart dtat 
			WT P14	Rest cKO P14	WT 1M	Rest cKO 1M	WT 3M	Rest cKO 3M
	Apex	n	15	18	14	57	24	33
		single AP	15(100%)	13(72.2%)	14(100%)	21(36.8%)	24(100%)	14(42.4%)
		silent	0(0%)	5(27.8%)	0(0%)	36(63.2%)	0(0%)	19(57.6%)
			WT P14	Rest cKO P14	WT 1M	Rest cKO 1M	WT 3M	Rest cKO 3M
	Base	n	15	17	18	51	36	58
		single AP	9(60.0%)	12(70.6%)	13(72.2%)	26(51.0%)	23(63.9%)	32(55.2%)
		phasic	3(20.0%)	2(11.8%)	3(16.7%)	2(3.9%)	10(27.8%)	6(10.3%)
		tonic	3(20.0%)	1(5.9%)	2(11.1%)	5(9.8%)	3(8.3%)	1(1.7%)
		silent	0(0%)	2(11.8%)	0(0%)	18(35.3%)	0(0%)	19(32.8%)

## Sheet: Fig. 3C RMP Summary
RMP(mV)
	Apex	WT P14	Rest cKO P14	WT 1m	Rest cKO 1m	WT 3m	Rest cKO 3m		Base	WT P14	Rest cKO P14	WT 1m	Rest cKO 1m	WT 3m	Rest cKO 3m
		-66.2	-58.6	-60.4	-57.3	-59.1	-56.1			-59.6	-59.9	-60.7	-62.8	-60.1	-57.7
		-59.4	-68.1	-62.5	-54.1	-60.4	-59.1			-62.6	-58.8	-58.2	-69.2	-56.9	-59.2
		-59.6	-62.5	-56.8	-60.3	-62.5	-55.4			-61.6	-64.7	-57.9	-57.8	-63.1	-53.6
		-58.9	-63.6	-62.8	-59.4	-56.8	-54.1			-47.7	-64.8	-60.9	-57.6	-59.6	-61.4
		-57.1	-62.6	-60.5	-61.8	-62.8	-63.6			-59.6	-60.7	-62.3	-57.8	-64.1	-67.1
		-63.8	-60.6	-59.6	-61.7	-60.5	-56.4			-54.5	-62.4	-60.2	-64.8	-54.3	-55.7
		-61.3	-60.7	-55.4	-57.1	-59.6	-53.4			-56.5	-64.2	-62.4	-59.3	-59.9	-61.5
		-56.1	-56.4	-50.1	-58.3	-55.4	-61.6			-56.5	-50.6	-60.8	-55.3	-55.5	-61.5
		-61.5	-63.2	-68.5	-56.1	-50.1	-56.9			-53.8	-70.8	-57.3	-64.7	-58.9	-59.2
		-61.6	-61.7	-55.6	-57.6	-56.5	-62.7			-58.3	-61.6	-60.5	-57.1	-51.4	-67.5
		-62.2	-61.6	-60.5	-56.3	-60.1	-55.1			-61.3	-58.7	-60.5	-55.1	-58.9	-53.2
		-59.4	-68.3	-59.8	-59.3	-58	-55.4			-61.5	-60.2	-60.1	-71.1	-59.9	-55.3
		-59.6	-53.5	-60.3	-58.6	-59.7	-59.6			-57.8	-65.9	-56.9	-60.8	-60.3	-57.8
			-69.1	-59.3	-62.7	-51.4	-56.5			-55.2	-65.7	-63.1	-61.5	-58.5	-59.2
			-67.9		-70.2	-61.9	-56.6			-56.5	-62.3	-59.6	-69.4	-58.9	-59.1
			-61.9		-61.9	-60.7	-55.8				-66.4	-56.5	-68.1	-52.2	-63.7
			-62.8		-55.9	-59.8	-60.7				-59.4	-64.1	-65.1	-54.9	-57.4
			-59.5		-64.5	-57.2	-55.7					-54.3	-65.1	-55.5	-56.3
					-67.4	-55.2	-61.4						-58.9	-60.2	-58.7
					-61.4	-58.5	-66.3						-54.6	-69.7	-59.6
					-69.8	-50.1	-67.5						-64.9	-57.6	-61.5
					-72.6	-54.8	-65.3						-67.5	-55.8	-57.6
					-71.7	-59.2	-64.6						-60.9	-55.3	-53.4
					-55.6	-57.1	-60.2						-61.6	-52.2	-62.8
					-63.9		-66.8						-58.6	-58.8	-52.6
					-63.1		-64.9						-58.2	-57.1	-57.8
					-67.4		-66.5						-63.9	-57.2	-59.8
					-63.7		-64.3						-59.7	-56.1	-59.3
					-63.6		-64.5						-62.9	-58.1	-58.1
					-70.2								-56.6	-54.9	-58.2
					-63.4								-62.7	-54.9	-53.2
					-55.9								-64.2	-60.9	-56.2
					-62.2								-60.8	-55.7	-52.4
					-63.6								-58.1	-50.8	-58.4
					-62.8								-54.8	-63.6	-60.9
					-70.1								-65.5		-55.1
					-57.9								-60.3		-51.1
					-64.2								-65.6		-56.6
					-60.8								-62.3		-57.4
					-60.5								-62.1		-63.2
					-65.7								-65.5		-56.7
					-60.8								-59.7		-52.6
					-53.1								-61.7		-74.5
					-64.8								-61.8		-64.3
					-67.3								-66.1		-62.7
					-64.3								-56.2		-60.7
					-63.2								-58.3		-60.8
					-64.1								-60.8		-72.1
					-62.7								-64.3		-53.4
					-64.3								-62.1		-57.4
					-64.2										-53.6
					-64.7										-62.3
					-61.3										-58.9
					-66.8										-53.5

## Sheet: Fig. 3D AP threshold Summary
AP threshold(mV)
	Apex	WT P14	Rest cKO P14	WT 1m	Rest cKO 1m	WT 3m	Rest cKO 3m		Base	WT P14	Rest cKO P14	WT 1m	Rest cKO 1m	WT 3m	Rest cKO 3m
		-30.31	-37.35	-35.8	-29.9	-35.4	-13.4			-30.57	-22.86	-33.39	-29.9	-34.5	-18.6
		-16.36	-33.17	-33.9	-23.8	-35.8	-25			-28.64	-34.61	-33.36	-34.8	-26.4	-34.7
		-31.68	-33.3	-32.3	-33.6	-33.9	-29			-21.18	-33.21	-24.63	-19.8	-27.8	-25.6
		-38.27	-34.93	-22.4	-19.1	-25.8	-31.9			-17.15	-33.57	-23.91	-35.7	-29.8	-17.1
		-39.83	-26.31	-24.1	-37.1	-32.3	-28.7			-30.79	-31.34	-39.92	-30.7	-29.9	-27.2
		-34.76	-31.48	-33	-33.1	-22.4	-19.7			-23.72	-36.29	-25.54	-36.6	-23.7	-23.8
		-34.61	-26.51	-29.2	-32.5	-24.1	-24.3			-34.45	-24.99	-30.24	-25.2	-30.4	-38.1
		-39.06	-24.99	-34.9	-29.6	-33	-28.1			-29.69	-38.48	-19.65	-20.8	-27.9	-27.4
		-35.64	-31.04	-30.26	-33.6	-27.3	-20.8			-25.66	-26.85	-24.75	-32.5	-31.7	-15.1
		-33.72	-20.54	-28.72	-30.1	-26.2	-16.3			-33.11	-26.56	-33.63	-29.4	-27.8	-17.2
		-43.46	-20.35	-36.58	-25.1	-29.2	-26.1			-34.09	-20.11	-35.51	-26.4	-24.9	-23.76
		-27.07	-24.57			-31.9				-36.99	-30.32	-34.5	-31.7	-33.3	-26.6
		-30.49	-19.84			-27.9				-35.01	-32.99	-26.4	-37.1	-26.2	-23.7
										-38.42	-31.25	-27.8	-20.1	-33.1	-22.4
										-36.56	-31.77	-29.8	-27.9	-23.5	-21.1
												-26.2		-24.1	-26.7
												-29.9		-24.3	-20.9
												-23.7		-28.5	-27.1
														-33.4	-26.4
														-33.3	-20.1
														-27.8	-23.2
														-31.1	-23.1
														-23.2	-30.2
														-34.6	-22.9
														-30.3
														-31.1
														-37.4
														-28.8
														-29.1
														-41.1
														-34.1
														-31.1
														-43.8

## Sheet: Fig. 3E Latency Summary data
Latency(ms)
	Apex	WT P14	Rest cKO P14	WT 1m	Rest cKO 1m	WT 3m	Rest cKO 3m		Base	WT P14	Rest cKO P14	WT 1m	Rest cKO 1m	WT 3m	Rest cKO 3m
		1.6	1.65	1.7	1.37	2.37	1.27			1.18	1.65	1.79	1.42	1.28	1.82
		1.22	3.07	1.08	2.37	1.7	1.32			3.38	2.11	1.16	2.48	2.69	1.98
		1.05	1.2	1.06	2.35	1.08	0.96			1.58	1.83	1.46	2.65	1.7	1.92
		2.53	2.32	1.09	1.96	1.06	1.17			1.94	1.46	1.11	2.27	1.34	0.96
		2.58	1.78	1.38	1.42	1.09	1.42			1.36	2.14	1.21	1.67	1.71	1.72
		1.86	1.77	1.06	2.11	1.38	2.11			1.63	1.67	2.07	2.24	2.95	1.82
		2.39	1.14	0.96	2.51	1.06	2.07			1.37	3.45	1.67	1.74	1.23	1.17
		3.09	1.69	1.67	2.41	0.96	1.06			1.21	1.71	1.85	1.95	0.97	1.47
		4.09	1.31	1.3	2.82	1.67	1.22			1.47	2.13	1.92	2.97	1.61	1.04
		1.89	1.98	0.78	2.18	0.96	1.84			1.37	1.92	1.84	2.43	1.66	1.55
		1.55	1.77	1.88	1.81	1.3	1.64			1.46	2.86	1.28	2.13	1.76	1.86
		2.02	3.51	1.68	2.11	2.35				2.01	2.63	2.69	2.49	1.41	3.09
		1.78	3.76	1.56		1.29				3.14	2.45	1.7	2.66	1.69	1.73
				1.16		2.25				1.78	3.67	1.34	3.62	1.51	1.95
						2.75				2.38	1.61	1.71	2.81	1.57	1.69
												2.95	1.78	1.54	2.96
													1.92	1.48	1.55
														1.32
														1.54
														2.53
														1.28
														1.11
														1.21
														1.49
														1.33
														1.33
														1.41
														2.15
														1.59
														1.67
														1.35
														1.79
														1.25
														0.98
														1.52
														1.09

## Sheet: Fig. 3F Rheobase Summary data
AP rheobase(nA)
	Apex	WT P14	Rest cKO P14	WT 1m	Rest cKO 1m	WT 3m	Rest cKO 3m		Base	WT P14	Rest cKO P14	WT 1m	Rest cKO 1m	WT 3m	Rest cKO 3m
		0.2	0.3	0.2	0.4	0.2	0.45			0.15	0.3	0.3	0.35	0.4	0.15
		0.3	0.5	0.25	0.5	0.4	0.3			0.1	0.2	0.15	0.5	0.2	0.2
		0.2	0.3	0.15	0.5	0.4	0.35			0.3	0.2	0.2	0.3	0.15	0.3
		0.15	0.4	0.2	0.35	0.4	0.35			0.25	0.1	0.1	0.3	0.1	0.5
		0.2	0.4	0.3	0.3	0.4	0.4			0.3	0.1	0.25	0.4	0.3	0.35
		0.2	0.25	0.35	0.5	0.2	0.3			0.1	0.2	0.25	0.5	0.15	0.5
		0.2	0.25	0.15	0.45	0.2	0.3			0.15	0.05	0.25	0.5	0.35	0.2
		0.25	0.25	0.2	0.3	0.4	0.3			0.05	0.35	0.3	0.1	0.2	0.25
		0.15	0.25	0.2	0.5	0.2	0.4			0.1	0.25	0.35	0.25	0.25	0.25
		0.15	0.35	0.1	0.4	0.2	0.3			0.05	0.15	0.3	0.3	0.2	0.35
		0.15	0.15	0.2	0.4	0.4	0.4			0.15	0.15	0.25	0.5	0.25	0.25
		0.05	0.4	0.25	0.45	0.2	0.4			0.3	0.25	0.2	0.4	0.2	0.2
		0.15	0.25	0.2	0.35	0.4	0.354167			0.3	0.25	0.15	0.35	0.2	0.15
				0.3	0.35	0.4				0.25	0.25	0.25	0.5	0.05	0.25
					0.45						0.2	0.3	0.35	0.1	0.5
												0.15	0.5	0.2	0.2
												0.2	0.15	0.2	0.25
												0.2	0.5	0.2	0.1
													0.5	0.25	0.4
													0.35	0.25	0.4
													0.4	0.35	0.4
													0.1	0.25	0.4
													0.5	0.15	0.4
													0.5	0.25	0.4
													0.5	0.15	0.4
													0.4	0.1	0.4
													0.5	0.25	0.35
													0.35	0.15	0.35
													0.35
