# Supplementary material for: Repressor element 1-silencing transcription factor deficiency yields profound hearing loss through Kv7.4 channel upsurge in auditory neurons and hair cells
Source: eLife journal article supplement (doi:10.7554/elife.76754), 2022-09-20
Supplement: fig4-data1 [file Fig.4 A.xlsx]

## Sheet: Fig.4 A
																			Figure 4. Kv7.4 expression is increased in SGNs and HCs of Rest cKO mice
Nav1.1	ΔCt	ΔΔ Ct	ΔΔ Ct*(-1)	2^-ΔΔCt		Nav1.6	ΔCt	ΔΔ Ct	ΔΔ Ct*(-1)	2^-ΔΔCt		Nav1.7	ΔCt	ΔΔ Ct	ΔΔ Ct*(-1)	2^-ΔΔCt			A Kcnq4 expression is significantly increased in the cochlea of Rest cKO mice at the mRNA (Kv7.4) levels as determined by real-time PCR
WT-1	5.66179		0.0691118	1.04907		WT-1	4.33727		0.122744	1.0888		WT-1	9.03124		0.434013	1.35099
WT-2	5.92666	5.7309	-0.195756	0.873115		WT-2	4.70862	4.46001	-0.248611	0.841706		WT-2	9.82306	9.46526	-0.357799	0.780354
WT-3	5.60426		0.126645	1.09175		WT-3	4.33414		0.125868	1.09116		WT-3	9.54147		-0.0762146	0.948543
Rest cKO1	5.88784	0.156935	-0.156935	0.896929		Rest cKO1	4.66901	0.209	-0.209	0.865137		Rest cKO1	9.54245	0.077189	-0.077189	0.947903
Rest cKO2	6.19165	0.460745	-0.460745	0.726611		Rest cKO2	4.27722	-0.182794	0.182794	1.13508		Rest cKO2	10.171	0.705769	-0.705769	0.613116
Rest cKO3	6.13972	0.408818	-0.408818	0.75324		Rest cKO3	5.00188	0.54187	-0.54187	0.68688		Rest cKO3	9.59167	0.126416	-0.126416	0.916104
Kv4.3	ΔCt	ΔΔ Ct	ΔΔ Ct*(-1)	2^-ΔΔCt		Kv1.1	Δ Ct	ΔΔ Ct	ΔΔ Ct*(-1)	2^-ΔΔCt		Kv1.2	Δ Ct	ΔΔ Ct	ΔΔ Ct*(-1)	2^-ΔΔCt
WT-1	8.22721		0.0348428	1.02445		WT-1	3.53963		-0.2026	0.868983		WT-1	4.76168		-0.15618	0.897398
WT-2	8.25964	8.26205	0.00240909	1.00167		WT-2	3.2626	3.33703	0.0744284	1.05294		WT-2	4.66119	4.6055	-0.0556885	0.962135
WT-3	8.2993		-0.0372519	0.974509		WT-3	3.20886		0.128172	1.09291		WT-3	4.39363		0.211869	1.15819
Rest cKO1	8.54732	0.28527	-0.28527	0.820588		Rest cKO1	3.69707	0.360037	-0.360037	0.779144		Rest cKO1	5.05651	0.451012	-0.451012	0.73153
Rest cKO2	8.26713	0.00508556	-0.00508556	0.996481		Rest cKO2	3.43995	0.102923	-0.102923	0.931145		Rest cKO2	5.2397	0.634206	-0.634206	0.644296
Rest cKO3	8.66197	0.399919	-0.399919	0.757901		Rest cKO3	3.57649	0.23946	-0.23946	0.847062		Rest cKO3	4.44618	-0.159315	0.159315	1.11676
HCN1	Δ Ct	ΔΔ Ct	ΔΔ Ct*(-1)	2^-ΔΔCt		HCN2	Δ Ct	ΔΔ Ct	ΔΔ Ct*(-1)	2^-ΔΔCt		Kv7.2	Δ Ct	ΔΔ Ct	ΔΔ Ct*(-1)	2^-ΔΔCt
WT-1	5.20571		-0.0986969	0.933876		WT-1	5.57965		-1.35285	0.391517		WT-1	6.97795		-0.354521	0.782129
WT-2	5.06744	5.10701	0.0395695	1.02781		WT-2	3.45937	4.22679	0.767423	1.70223		WT-2	6.44736	6.62343	0.176068	1.1298
WT-3	5.04788		0.0591274	1.04184		WT-3	3.64136		0.585431	1.50049		WT-3	6.44498		0.178453	1.13167
Rest cKO1	5.44951	0.342499	-0.342499	0.788674		Rest cKO1	4.3157	0.0889104	-0.0889104	0.940233		Rest cKO1	6.8513	0.227871	-0.227871	0.853894
Rest cKO2	5.28606	0.179052	-0.179052	0.883283		Rest cKO2	4.14779	-0.079005	0.079005	1.05629		Rest cKO2	7.06879	0.445358	-0.445358	0.734402
Rest cKO3	5.22704	0.120032	-0.120032	0.920168		Rest cKO3	4.00299	-0.223803	0.223803	1.16781		Rest cKO3	7.12969	0.50626	-0.50626	0.704045
Kv7.3	Δ Ct	ΔΔ Ct	ΔΔ Ct*(-1)	2^-ΔΔCt		Kv7.4	Δ Ct	ΔΔ Ct	ΔΔ Ct*(-1)	2^-ΔΔCt
WT-1	6.85669		-0.264845	0.832288		WT-1	8.94429		0.196903	1.14623
WT-2	6.44736	6.59185	0.144487	1.10534		WT-2	8.72179	9.14119	0.419401	1.33737
WT-3	6.47149		0.120358	1.087		WT-3	9.75749		-0.616304	0.65234
Rest cKO1	6.76145	0.169604	-0.169604	0.889087		Rest cKO1	8.25526	-0.885932	0.885932	1.84796
Rest cKO2	6.69679	0.104946	-0.104946	0.92984		Rest cKO2	7.9135	-1.22768	1.22768	2.34191
Rest cKO3	7.12969	0.537841	-0.537841	0.688801		Rest cKO3	8.24139	-0.899803	0.899803	1.86581
