# Supplementary material for: Repressor element 1-silencing transcription factor deficiency yields profound hearing loss through Kv7.4 channel upsurge in auditory neurons and hair cells
Source: eLife journal article supplement (doi:10.7554/elife.76754), 2022-09-20
Supplement: fig4-data1 [file Fig.4 B.xlsx]

## Sheet: Fig.4 B
													Figure 4. Kv7.4 expression is increased in SGNs and HCs of Rest cKO mice
Grayscale values of protein strips													B Kcnq4 expression is significantly increased in the cochlea of Rest cKO mice at the protein (Kv7.4) levels as determined by Western blotting.
		Kv7.4
		WT					Rest cKO
		10.13	9.42	14.86	14.21		89.19	36.01	115.17	81.54
		Tublin
		WT					Rest cKO
		81.21	85.41	99.61	80.55		79.75	93.36	98.96	121.52
