# Supplementary material for: Repressor element 1-silencing transcription factor deficiency yields profound hearing loss through Kv7.4 channel upsurge in auditory neurons and hair cells
Source: eLife journal article supplement (doi:10.7554/elife.76754), 2022-09-20
Supplement: fig4-data1 [file Fig.4 DEF.xlsx]

## Sheet: Fig.4 D
					Figure 4. Kv7.4 expression is increased in SGNs and HCs of Rest cKO mice
	Fluorescence intensity of Kv7.4				D,E,F, Immunofluorescence shows increased Kv7.4 (red) expression in the SGNs from apical, middle, and basal cochlea in Rest cKO mice.
Apex	WT	Rest cKO
	80.56	201.61
	86.1	158.2
	77.17	158.91
	73.31	165.99
	100.13	159.14
	118.46	170.17
	105.14	174.61
	100.55	139.92
	95.13	140.15
	74.45	173.32
	101.25	180.75
	98.82	185.24
	114.89	209.42
	83.42	207.35
	94.32	186.19
	116.4	177.5
	109.28	172.19
	77.58	194.68
	91.62	162.24
	86.81	189.28
	69.89	194.38
	95.47	217.07
		164.79
		166.96
		150.38
		157.9
		178.77

## Sheet: Fig.4 E
	Fluorescence intensity of Kv7.4
Middle	WT	Rest cKO
	81.67	165.87
	84.02	164.91
	76.51	145.49
	59.37	155.65
	63.68	174.48
	101.94	168.15
	79.6	141.87
	67.49	143.43
	83.44	149.28
	70.36	165.37
	69.44	163.06
	55.59	168.83
	72.73	164.74
	58.84	150.01
	63.42	192.54
	69.49	181.3
		156.76
		178.03
		165.33
		168.07
		155.79
		156.5
		152.38
		152.13
		142.8
		158.73
		142.8

## Sheet: Fig.4 F
	Fluorescence intensity of Kv7.4
Base	WT	Rest cKO
	69.77	131.8
	82.92	146.35
	78.36	153.43
	93.47	136.23
	97.59	123.97
	74.79	144.34
	70.84	125.7
	69.5	112.05
	68.08	165.99
	87.77	146.74
	92.36	110.96
	77.66	133.25
	81.95	135.25
	62.58	135.85
	76.92	133.71
	75.69	148.98
	63.88	111.45
	89.16	134.53
	86.16	153.53
	86.9	153.05
	84.18	144.68
	92.91	133.2
		145.4
