# Supplementary material for: Repressor element 1-silencing transcription factor deficiency yields profound hearing loss through Kv7.4 channel upsurge in auditory neurons and hair cells
Source: eLife journal article supplement (doi:10.7554/elife.76754), 2022-09-20
Supplement: fig4-data1 [file Fig.4 H.xlsx]

## Sheet: Fig.4 H
											Figure 4. Kv7.4 expression is increased in SGNs and HCs of Rest cKO mice
Fluorescence intensity of Kv7.4											H, Kv7.4 expression is increased in HCs of Rest cKO mice.
	Apex			Middle			Base
	WT	Rest cKO		WT	Rest cKO		WT	Rest cKO
	89	128		77	138.48		100	156.835
	76	106		80	129.075		78	160.705
	92	157		93	129.885		80	129.295
	83	106		98	147.12		75	138.925
	93	126		103	142.665		103	143.65
	64	139		81	154.32		94	135.505
	90	139		73	135.015		96	135.01
	97	158		75	159.495		104	146.215
	106	121		101	122.505		94	133.12
	69	143		80	149.775		82	150.94
	76	150		86	136.86		91	158.725
	104	103		90	139.74		108	152.83
	83	139		72	145.5		96	145.18
	85				147.255		107	155.665
					159.315		99	149.005
