# Supplementary material for: Repressor element 1-silencing transcription factor deficiency yields profound hearing loss through Kv7.4 channel upsurge in auditory neurons and hair cells
Source: eLife journal article supplement (doi:10.7554/elife.76754), 2022-09-20
Supplement: fig5-figsupp1-data1 [file Figure_5_supplement_figure_1_source_data.xlsx]

## Sheet: Fig. 5-S Fig.1 B
Fluorescence intensity of Kv7.2												Figure 5-figure supplement 1. Expression of Kv7.2 and Kv7.3 in the SGNs of WT and Rest cKO mice
	WT				Rest cKO							B, Quantification of Kv7.2 expression in the SGNs of WT and Rest cKO mice.
	apex	middle	base		apex	middle	base
	89.28	76.5	100.35		97.56	78.48	101.835
	75.78	80.19	78.39		80.01	69.075	105.705
	91.89	93.06	80.37		105.84	69.885	74.295
	83.16	97.875	74.79		77.085	87.12	83.925
	93.375	102.96	103.455		106.2	82.665	88.65
	63.9	80.82	93.555		87.165	94.32	80.505
	89.64	73.35	95.985		75.96	75.015	80.01
	97.155	74.835	104.4		78.615	99.495	91.215
	106.065	100.665	93.555		79.335	62.505	78.12
	69.39	66.195	107.685		98.235	89.775	95.94
	76.275	72.405	81.63		71.055	76.86	103.725
	103.86	79.515	91.26		93.06	79.74	97.83
	83.475	86.4	108.315		88.29	85.5	90.18
	85.14	89.685	96.345		90.18	87.255	100.665
	65.52	71.91	107.325		102.51	99.315	94.005
	96.66		108.675		87.48
	79.335		99.315		87.705
	96.075				108.585
	94.5

## Sheet: Fig. 5-S Fig.1 D
Fluorescence intensity of Kv7.3										D, Quantification of Kv7.3 expression in the SGNs of WT and Rest cKO mice.
	WT				Rest cKO
	apex	middle	base		apex	middle	base
	70.84	60.8	68.65		63.9	58.566	65.296
	58.45	57.45	66.85		60.21	45.494	67.144
	58.24	71.5	64		74.43	63.726	55.88
	62.58	60.35	53.6		64.8	56.76	51.832
	77.42	52.75	61.05		54.18	66.65	66.704
	72.87	60.15	68.7		70.56	62.522	46.024
	64.75	62.15	63.8		72.36	60.114	71.808
	73.99	74.1	70.6		50.85	69.144	71.984
	72.17	64.8	72.9		56.16	56.416	57.992
	61.46	57.1	58.15		75.24	60.63	51.568
	58.59	52.5	57.9		59.94	54.438	64.064
	62.02	65.1	62.8		50.22	48.59	69.52
	71.54	59.05	62.85		41.58	72.412	50.248
	78.4	63.05	64.65		76.68	43.516	58.256
	56.28	77.9	69.1		65.34	68.026	60.368
	77.77	61.55	83.45		63	59.684	60.72
	69.65	53.75	63.35		62.91	49.278	71.192
	68.04				54.18	50.74
	53.48				68.85
					72.45
