# Supplementary material for: Repressor element 1-silencing transcription factor deficiency yields profound hearing loss through Kv7.4 channel upsurge in auditory neurons and hair cells
Source: eLife journal article supplement (doi:10.7554/elife.76754), 2022-09-20
Supplement: fig7-data1 [file Figure_7-source_data.xlsx]

## Sheet: Figure 7B
d0																																									Figure 7. Kv7.4 channel activation induced mice hearing impairments
Control	Tone(dB)									Saline	Tone(dB)									Fasudil 10mg/kg	Tone(dB)									Fasudil 20mg/kg	Tone(dB)										B, ABR thresholds in control, saline, and fasudil (10 mg/kg, 20 mg/kg) treatment groups on days 0, 14, and 28.
	4k	8k	12k	16k	20k	24k	28k	32k			4k	8k	12k	16k	20k	24k	28k	32k			4k	8k	12k	16k	20k	24k	28k	32k			4k	8k	12k	16k	20k	24k	28k	32k
1	40	35	30	40	40	45	50	50		1	45	40	35	45	45	50	55	55		1	40	30	30	35	35	45	50	55		1	50	40	30	35	40	50	55	60
2	45	35	40	40	45	55	50	55		2	50	45	40	35	45	50	50	55		2	45	35	35	30	40	40	45	50		2	45	40	35	45	45	50	60	60
3	40	45	40	45	50	55	55	60		3	45	35	40	35	45	50	50	50		3	45	40	35	30	35	45	50	55		3	50	45	35	35	40	40	55	65
4	40	30	25	35	40	45	55	55		4	50	35	45	35	45	45	50	60		4	40	30	35	35	40	50	50	50		4	45	40	30	35	40	45	50	55
5	40	40	35	35	35	50	55	60		5	40	45	40	35	40	50	55	55		5	45	40	30	45	45	45	55	60		5	45	35	30	35	40	40	50	60
6	45	35	30	35	45	50	55	60		6	45	45	45	45	45	50	50	60		6	45	40	35	30	35	45	50	50		6	50	45	45	40	40	45	50	60
7	40	30	25	30	35	45	55	65		7	40	40	40	35	40	45	55	60		7	50	45	30	35	45	50	50	55		7	45	35	40	40	45	45	50	55
8	50	40	30	30	40	50	60	65		8	45	40	35	45	55	60	60	60		8	45	35	30	35	45	50	50	50		8	45	40	35	40	45	50	55	65
9	45	40	40	35	50	55	60	65		9	45	35	30	40	40	45	50	50		9	50	45	30	35	35	45	50	60		9	45	40	35	35	40	50	55	65
10	40	40	30	35	45	50	60	60		10	45	35	30	40	45	55	50	55		10	40	45	30	35	40	50	55	55		10	45	35	30	35	45	50	55	60
11	45	35	30	30	40	45	55	60		11	40	35	35	40	45	55	55	60		11	50	45	40	40	45	50	55	60		11	50	45	35	40	45	50	50	65
12	40	35	35	30	35	45	50	55		12	40	40	35	35	35	50	50	55		12	50	45	35	40	45	50	50	65		12	45	40	35	45	45	50	50	65
13	45	30	30	35	45	55	60	60		13	40	40	35	35	35	50	55	60		13	45	35	40	40	40	45	50	60		13	40	45	35	45	50	50	55	60
14	45	35	30	35	40	50	55	65		14	40	35	30	30	40	45	50	55		14	45	40	35	45	45	50	50	65		14	45	40	40	45	45	45	55	65
15	40	40	35	30	35	45	55	60		15	40	40	45	40	45	50	55	65		15	40	45	35	45	50	50	55	60		15	40	30	35	45	50	50	55	65
										16	45	30	35	35	35	45	55	60		16	50	40	40	45	45	50	55	60		16	40	35	35	40	50	50	55	60
										17	40	40	35	35	40	50	55	65		17	45	40	40	45	55	60	60	60
										18	45	35	30	35	45	50	55	60
d14
Control	Tone(dB)									Saline	Tone(dB)									Fasudil 10mg/kg	Tone(dB)									Fasudil 20mg/kg	Tone(dB)
	4k	8k	12k	16k	20k	24k	28k	32k			4k	8k	12k	16k	20k	24k	28k	32k			4k	8k	12k	16k	20k	24k	28k	32k			4k	8k	12k	16k	20k	24k	28k	32k
1	45	35	30	30	40	45	50	55		1	45	35	30	40	40	50	55	60		1	45	40	35	35	40	45	55	65		1	50	40	35	40	45	50	60	65
2	45	40	30	40	45	50	50	65		2	45	35	35	40	45	55	55	60		2	45	35	35	40	45	50	60	65		2	45	40	40	45	50	55	65	70
3	40	30	35	35	45	45	55	60		3	45	40	40	45	45	55	60	65		3	45	40	40	40	45	50	55	60		3	50	45	40	40	45	50	55	65
4	40	40	35	35	35	50	50	65		4	40	40	40	45	50	50	55	65		4	40	35	35	40	45	50	50	60		4	45	40	35	40	45	50	50	60
5	40	35	35	35	35	50	55	60		5	45	40	40	40	45	55	60	65		5	45	40	35	45	45	45	60	70		5	45	40	35	40	45	50	55	65
6	40	35	30	40	40	50	50	60		6	40	35	35	40	45	50	55	60		6	45	40	35	40	40	45	50	60		6	50	45	45	40	40	45	50	60
7	40	40	45	40	45	55	55	60		7	45	40	35	40	45	55	60	60		7	50	45	40	40	45	50	55	55		7	50	40	40	45	50	50	60	65
8	45	40	35	45	35	50	55	65		8	45	40	35	45	45	50	60	65		8	45	35	35	40	45	50	50	60		8	45	40	40	40	45	50	55	70
9	40	40	35	45	40	50	55	65		9	40	40	40	45	50	50	55	65		9	50	45	30	35	40	45	50	60		9	50	40	35	35	40	55	55	70
10	45	35	30	40	45	55	55	65		10	45	35	35	40	45	55	60	65		10	45	45	35	35	40	50	55	65		10	45	40	35	40	45	50	55	65
11	45	40	35	40	45	50	55	60		11	45	40	35	45	45	50	55	55		11	50	40	35	40	50	55	60	60		11	50	45	40	40	45	50	60	65
12	50	45	40	45	50	50	55	65		12	50	45	40	35	45	50	50	55		12	50	45	45	45	50	55	60	65		12	45	45	45	45	50	55	65	70
13	50	40	35	45	45	50	60	65		13	45	35	40	35	45	50	50	50		13	45	45	40	35	45	55	60	60		13	45	40	45	45	45	55	50	70
14	45	40	40	45	50	55	65	70		14	50	35	45	35	45	45	50	60		14	45	35	45	45	50	50	55	60		14	50	40	40	40	45	50	50	65
15	45	35	35	40	45	60	65	70		15	40	45	40	35	40	50	55	55		15	45	45	40	45	50	50	55	65		15	45	40	45	40	45	50	55	65
										16	45	45	45	45	45	50	50	60		16	50	45	45	35	45	50	55	65		16	45	45	45	45	50	55	60	70
										17	40	40	40	35	40	45	55	60		17	45	40	40	40	50	50	55	65
										18	45	40	35	45	55	60	60	60
d28
Control	Tone(dB)									Saline	Tone(dB)									Fasudil 10mg/kg	Tone(dB)									Fasudil 20mg/kg	Tone(dB)
	4k	8k	12k	16k	20k	24k	28k	32k			4k	8k	12k	16k	20k	24k	28k	32k			4k	8k	12k	16k	20k	24k	28k	32k			4k	8k	12k	16k	20k	24k	28k	32k
1	50	45	40	40	45	50	55	60		1	50	40	35	40	50	55	60	60		1	55	50	45	60	70	80	90	>90		1	50	50	55	60	70	70	80	>90
2	45	35	40	40	40	45	50	65		2	50	45	45	45	50	55	60	65		2	50	50	50	60	65	75	80	90		2	55	50	45	60	70	80	90	>90
3	40	45	35	45	50	50	55	60		3	45	45	40	35	45	55	60	60		3	55	50	45	55	65	70	80	90		3	60	45	45	60	70	80	>90	>90
4	45	40	40	45	45	50	55	65		4	45	35	45	45	50	50	55	60		4	55	55	50	55	70	80	90	>90		4	60	50	55	90	>90	>90	>90	>90
5	45	40	35	45	45	50	55	60		5	45	45	40	45	50	50	55	65		5	55	55	50	60	70	85	90	>90		5	55	50	45	50	80	90	90	>90
6	45	35	40	35	45	50	50	60		6	50	45	45	35	45	50	55	65		6	55	50	45	50	60	70	80	90		6	50	50	50	60	70	90	>90	>90
7	40	45	40	35	40	50	55	65		7	45	40	40	40	50	50	55	65		7	50	45	40	50	65	75	90	90		7	50	50	45	55	65	70	80	>90
8	40	40	40	35	40	45	55	65		8	45	45	40	45	50	55	60	60		8	55	50	45	55	60	80	90	>90		8	60	55	50	55	60	70	80	>90
9	40	40	40	35	40	45	55	60		9	50	40	35	40	50	55	60	60		9	50	45	45	55	60	75	85	90		9	55	50	50	60	60	75	85	>90
10	50	45	45	45	50	55	60	65		10	50	45	45	45	50	55	60	65		10	55	50	45	50	65	75	90	90		10	60	55	50	55	65	70	85	>90
11	40	40	30	35	35	45	60	60		11	45	45	40	45	45	55	60	65		11	50	45	50	60	60	75	80	90		11	60	55	55	60	70	75	80	>90
12	45	35	30	30	40	45	50	50		12	45	35	45	45	50	50	55	60		12	50	50	50	65	75	80	90	90		12	60	55	55	60	65	80	90	>90
13	40	50	40	45	45	55	65	65		13	45	40	40	45	45	50	50	65		13	50	45	40	50	60	70	80	85		13	60	60	55	60	70	80	90	>90
14	45	30	35	35	35	45	50	60		14	40	40	40	45	50	50	55	65		14	50	45	45	55	55	70	80	90		14	55	50	50	55	65	75	85	>90
15	40	35	30	45	45	50	55	70		15	45	45	40	45	50	55	60	60		15	50	45	55	60	75	80	90	90		15	60	55	55	60	65	80	90	>90
										16	45	40	40	40	50	50	55	65		16	50	40	45	60	60	75	80	90		16	55	50	55	60	70	80	90	>90
										17	50	45	45	35	45	50	55	65		17	55	50	45	55	70	80	80	90
										18	45	45	40	45	50	50	55	65

## Sheet: Figure 7C
Apex							C, D, Summary data show an increase in Kv7 current density in the apical and basal SGNs of fasudil (10 mg/kg, 20 mg/kg)-treated mice.
	Kv7 current density(pA/pF)
	Control	Saline	Fasudil 10mg/kg	Fasudil 20mg/kg
	8.82051	3.79487	9.62931	8.59322
	7.98291	5.05983	7.16379	13.339
	7.62393	4.54701	9	9.14407
	7.78632	7.61538	7.80172	10.9576
	3.96581	7.29915	9.41379	9.47458
	5.94872	9.23932	8.87069	9.77119
	3.64957	6.2906	9.41379	9.50847
	7.35897	6.30769	8.02586	10.6102
	4.64103		8.68966	11.2034
				12.1017

## Sheet: Figure 7D
Base							C, D, Summary data show an increase in Kv7 current density in the apical and basal SGNs of fasudil (10 mg/kg, 20 mg/kg)-treated mice.
	Kv7 current density(pA/pF)
	Control	Saline	Fasudil 10mg/kg	Fasudil 20mg/kg
	4.33333	7.09483	8.7265	11.7845
	6.65812	5.93966	9.52991	11.3621
	9.11111	6.88793	7.87179	11.9914
	7.13675	6.86207	8.66667	9.51724
	9.28205	6.37069	10.2308	8.71552
	5.41026	4.84483	8.42735	9.68103
	6.64957	6.5	8.09402	8.63793
	4.8547	8.62931	9.16239	9.78448
	4.28205	4.86207		8.82759
				8.71552

## Sheet: Figure 7E
									E, Summary of spike patterns recorded in SGNs from control, saline, and fasudil (10 mg/kg, 20 mg/kg)-treated mice.
			Control	Saline	Fasudil 10mg/kg	Fasudil 20mg/kg
	Apex	n	11	12	16	30
		single AP	11(100%)	24(100%)	13(81.0%)	21(70.0%)
		silent	0(0%)	0(0%)	3(19.0%)	9(30.0%)
			Control	Saline	Fasudil 10mg/kg	Fasudil 20mg/kg
	Base	n	12	14	16	21
		single AP	6(50.0%)	8(57.1%)	7(43.8%)	9(42.9%)
		phasic	4(33.3%)	4(28.6%)	1(6.3%)	2(9.5%)
		tonic	2(16.7%)	2(14.3%)	1(6.3%)	1(4.8%)
		silent	0(0%)	0(0%)	7(43.8%)	9(42.9%)

## Sheet: Figure 7F
RMP(mV)														F–I, RMPs, action potential thresholds, latencies, and rheobases were recorded from the apical and basal SGNs of mice.
	Apex	Control	Saline	Fasudil 10mg/kg	Fasudil 20mg/kg		Base	Control	Saline	Fasudil 10mg/kg	Fasudil 20mg/kg
		-52.4	-63.6	-67.1	-66.8			-61.9	-59.6	-66.7	-66.5
		-60.1	-62.1	-66.5	-66.2			-60.2	-56.5	-65.7	-61.9
		-61.4	-63.5	-67.1	-67.4			-55.2	-60.9	-69.5	-67.5
		-63.5	-53.4	-70.6	-69.7			-60.2	-54.6	-62.4	-64.2
		-58.4	-65.8	-70.3	-67.3			-57.5	-57.1	-61.7	-65.2
		-65.5	-60.7	-64.5	-69.1			-59.5	-63.6	-64.4	-63.1
		-56.5	-61.9	-67.5	-65.4			-62.3	-59.6	-64.5	-65.5
		-56.3	-61.7	-68.1	-69.1			-56.4	-60.6	-69.1	-65.4
		-60.1		-66.8	-69.3			-60.8	-59.2		-64.2
					-67.3						-62.9

## Sheet: Figure 7G
AP Threshold(mV)														F–I, RMPs, action potential thresholds, latencies, and rheobases were recorded from the apical and basal SGNs of mice.
	Apex	Control	Saline	Fasudil 10mg/kg	Fasudil 20mg/kg		Base	Control	Saline	Fasudil 10mg/kg	Fasudil 20mg/kg
		-32.95	-31.46	-32.56	-24.54			-35.65	-32.78	-35.28	-29.08
		-41.35	-35.61	-29.39	-27.11			-35.57	-42.08	-25.96	-22.41
		-25.33	-33.28	-20.68	-28.29			-31.57	-26.82	-31.05	-23.44
		-29.42	-35.81	-31.07	-24.14			-35.64	-36.29	-28.44	-21.01
		-31.88	-26.64	-34.39	-23.81			-32.87	-31.34	-26.58	-30.85
		-33.14	-33.45	-29.69	-22.54			-35.28	-32.23	-31.28	-20.18
		-38.18	-34.61	-27.13	-30.36			-28.87	-24.32	-34.03	-27.91
		-32.76	-27.37	-29.47	-26.35			-32.2	-32.18	-29.69	-25.76
		-40.2	-27.43	-20.57	-25.73			-27.5	-28.32	-17.35	-28.78
		-27.9	-30.78	-24.96	-32.78			-28.5	-27.04	-16.8	-32.78
		-31.81	-36.99	-31.89	-23.65				-29.85	-26.2	-31.34
			-36.99	-32.66	-25.24				-33.14
				-34.15	-31.46				-34.15
					-27.95				-37.63
					-31.16
					-29.15
					-29.87

## Sheet: Figure 7H
Latency(ms)														F–I, RMPs, action potential thresholds, latencies, and rheobases were recorded from the apical and basal SGNs of mice.
	Apex	Control	Saline	Fasudil 10mg/kg	Fasudil 20mg/kg		Base	Control	Saline	Fasudil 10mg/kg	Fasudil 20mg/kg
		2.09	2.14	2.91	2.21			1.98	1.82	1.88	2.27
		1.93	1.21	2.08	2.25			1.39	1.83	1.81	1.96
		1.07	1.01	1.74	2.48			1.25	1.29	1.29	2.21
		1.48	1.35	2.73	1.82			0.65	1.62	3.06	1.91
		1.14	2.25	2.42	3.52			1.23	1.42	1.98	2.41
		1.71	1.27	2.58	3.19			1.53	1.56	1.84	2.14
		1.55	1.23	1.63	3.78			2.07	1.01	3.13	3.96
		1.15	1.35	2.24	2.54			0.96	1.85	1.42	1.41
		2.41	1.35	1.89	1.58			1.66	2.61	2.12	1.44
		1.29	1.74	1.97	3.03			1.37	1.81		2.47
		2.33	2.04	2.01	2.57			3.05	1.29		1.64
			1.31	1.59	4.37			2.95	0.98		3.37
				1.95	2.63				1.66
					2.46				1.72
					2.55				0.84
					2.48
					2.98
					1.75
					1.71
					2.41

## Sheet: Figure 7I
AP Rheobase(nA)														F–I, RMPs, action potential thresholds, latencies, and rheobases were recorded from the apical and basal SGNs of mice.
	Apex	Control	Saline	Fasudil 10mg/kg	Fasudil 20mg/kg		Base	Control	Saline	Fasudil 10mg/kg	Fasudil 20mg/kg
		0.1	0.15	0.3	0.2			0.25	0.2	0.3	0.25
		0.15	0.1	0.3	0.25			0.3	0.15	0.45	0.25
		0.15	0.15	0.25	0.25			0.2	0.25	0.45	0.25
		0.2	0.15	0.5	0.2			0.1	0.15	0.35	0.25
		0.15	0.1	0.4	0.5			0.2	0.25	0.4	0.3
		0.2	0.2	0.4	0.25			0.3	0.2	0.3	0.25
		0.15	0.15	0.3	0.4			0.25	0.15	0.1	0.4
		0.15	0.1	0.35	0.5			0.2	0.2	0.45	0.2
		0.3	0.2	0.3	0.25			0.15	0.1	0.45	0.5
		0.2	0.25	0.3	0.4			0.15	0.15		0.2
		0.25	0.2	0.3	0.4			0.1	0.1		0.5
			0.2	0.25	0.35			0.2	0.05		0.5
				0.3	0.4				0.25
					0.5				0.25
					0.5
					0.5
					0.3
					0.25
					0.2
					0.3
					0.3
