# Supplementary material for: Repressor element 1-silencing transcription factor deficiency yields profound hearing loss through Kv7.4 channel upsurge in auditory neurons and hair cells
Source: eLife journal article supplement (doi:10.7554/elife.76754), 2022-09-20
Supplement: fig7-figsupp1-data1 [file Figure_7-figure_supplement_1.xlsx]

## Sheet: WAVE 1 Latency
d28	wave 1 Latency(ms)-click																																						Figure 7-figure supplement 1
	stimulus level(dB)	control								saline								fasudil 10mg/kg									fasudil 20mg/kg												Amplitudes and latencies of ABR waves Ⅰ and Ⅱ in control, saline, and fasudil-treated mice
	50	1.395	1.765	1.478	1.642	1.56	1.519	1.478		1.675	1.56	1.601	1.642	1.642	1.272	1.437		1.539	1.662	1.415	1.58	1.662	1.662	1.621	1.744		1.518	1.641	1.559	1.887	1.518	1.559	1.637	1.677
	60	1.395	1.665	1.478	1.56	1.49	1.437	1.437		1.601	1.478	1.56	1.601	1.56	1.272	1.354		1.498	1.562	1.333	1.498	1.621	1.58	1.58	1.58		1.435	1.618	1.477	1.823	1.435	1.477	1.535	1.594
	70	1.313	1.583	1.437	1.478	1.378	1.313	1.395		1.511	1.437	1.478	1.56	1.478	1.231	1.313		1.374	1.539	1.21	1.374	1.58	1.498	1.498	1.498		1.412	1.518	1.394	1.7	1.394	1.445	1.423	1.494
	80	1.19	1.519	1.272	1.395	1.331	1.231	1.19		1.437	1.231	1.313	1.56	1.272	1.149	1.231		1.128	1.457	1.228	1.311	1.415	1.333	1.433	1.333		1.289	1.435	1.33	1.518	1.271	1.412	1.312	1.412
	90	1.149	1.397	1.19	1.254	1.19	1.19	1.149		1.395	1.19	1.272	1.19	1.19	1.067	1.231		1.046	1.333	1.248	1.31	1.251	1.292	1.251	1.21		1.248	1.23	1.189	1.477	1.289	1.23	1.258	1.271
	wave 1 Latency(ms)-tone of 16 kHz
	stimulus level(dB)	control								saline								fasudil 10mg/kg									fasudil 20mg/kg
	50	1.575	1.668	1.8779	1.51062	1.59426	1.6779	1.39426		1.636	1.636	1.678	1.511	1.594	1.678	1.89426		/	/	/	/	/	/	/	/		/	/	/	/	/	/	/	/
	60	1.512	1.463	1.66778	1.46778	1.46778	1.59426	1.31062		1.511	1.594	1.468	1.468	1.468	1.594	1.81062		/	2.298	2.134	2.175	2.298	/	2.298	2.381		2.134	/	/	/	2.75		2.216	2.134
	70	1.406	1.463	1.63208	1.38414	1.42596	1.51062	1.22596		1.384	1.552	1.432	1.384	1.426	1.511	1.72596		1.724	2.093	2.093	1.888	2.298	2.668	2.175	2.216		1.806	2.75	2.627	2.668	2.627	2.627	1.847	2.011
	80	1.324	1.463	1.54232	1.3005	1.3005	1.42596	1.18414		1.301	1.384	1.342	1.301	1.301	1.426	1.68414		1.601	1.642	2.093	1.888	2.257	2.463	1.97	2.093		1.765	2.627	2.504	2.422	2.545	2.175	1.642	1.847
	90	1.201	1.298	1.45868	1.25766	1.25868	1.38414	1.1005		1.259	1.342	1.259	1.258	1.259	1.384	1.6005		1.354	1.642	2.011	1.765	2.504	2.175	1.847	2.052		1.601	2.216	2.134	2.34	2.34	2.052	1.601	1.683

## Sheet: WAVE 1 Amplitude
d28	wave 1 Amplitude(nV)-click
	stimulus level(dB)	control								saline								fasudil 10mg/kg									fasudil 20mg/kg
	50	1991.18	1981.95	2129.4	2147.17	1951.8	2385.8	2352.76		965.281	2382.66	3213.26	1092.51	2989.38	3417.33	1866.62		635.146	711.494	1509.89	764.176	777.468	1554.56	979.482	2130.09		710.903	650.974	597.84	1406.37	1065.09	1354.96	2071.51	2227.36
	60	3014.26	3166.31	2708.81	2787.25	2530.78	2871.18	2898.72		1266.23	3288.32	3463.07	1526.38	3123.01	3502.29	3908.07		855.506	1087.72	1734.14	1172.37	838.474	1626.38	1912.51	3211.35		1197.49	858.426	772.375	1501.15	1680.58	1460.39	2328.32	2563.57
	70	3114.19	4450.9	3182.66	3487.16	2818.13	3427.22	4067.85		1502.63	3467.71	3762.89	2454.22	3637.71	4533.15	5306.47		924.899	1333.5	1755.2	1194.49	1163.19	1664.39	3425.79	4480.16		1686.77	926.082	892.129	1557.83	1708.47	1589.22	2376.82	2947.83
	80	3951.68	4985.61	3665.3	3829.89	3606.2	3582.1	4789.8		1509.34	4081.82	3955.39	2958.53	4022.52	4579.68	6813.47		951.096	1417.87	1764.51	1348.99	1176.36	1955.48	4989.33	4730.07		1812.19	1314.44	936.162	1807.41	1801.34	1813.2	2378.06	3671.56
	90	4590.9	5021.07	4287.7	3926.07	4533.3	3655.4	4824.13		2297.15	4173.23	4286.82	2345.37	4230.63	4768.48	8128.42		1274.07	1459.68	2477.34	1389.95	1357.42	3398.29	6007.06	5316.38		2069.37	2035.09	1267.49	1964.62	2258.72	3227.62	2837.66	3784.47
	wave 1 Amplitude(nV)-tone of 16 kHz
	stimulus level(dB)	control								saline								fasudil 10mg/kg									fasudil 20mg/kg
	50	1209.44	1272.25	1358.34	1504.73	1676.84	1363.16	1583.15		1211.66	1298.25	1507.76	1596.99	1293.66	1433.08	1951.85		/	/	/	/	/	/	/	/		/	/	/	/	/	/	/	/
	60	1720.44	1728.53	1694.14	2136.46	2149.67	1990.43	2180.04		1946.22	1895.64	2076.23	2047.31	1613.46	2034.72	2738.51		/	919.601	899.4	979.196	794.75	/	1040.55	943.78		870.108	/	/	/	769.884	/	875.565	908.575
	70	2306.71	2370.25	2764.27	2584.47	2389.22	2833.22	2764.25		2257.38	2126.87	2632.62	2275.45	2632.64	2461.4	2996.87		1487.24	1106.71	1051.65	1079.2	1092.39	1114.56	1242.74	1295.61		1159.99	1070.02	912.922	1023.71	1093.23	961.291	1259.57	1114.43
	80	3346.51	3242.03	2802.9	3058.09	2528.43	3101.05	2988.57		3087.65	2858.15	2846.26	2408.03	2669.43	2912.46	3987.16		1745.38	1667.85	1741.05	1658.02	1626.32	1422.25	1638.96	1756.19		1222.72	1335.66	1262.81	1339.43	1205.08	1322.47	1312.56	1485.76
	90	3441.78	3939.16	3316.09	3584.75	2938.84	3353.86	3274.76		3275.39	3194.15	3023.58	2798.9	3258.18	3318.81	4277.89		2440.5	1971.87	2055.54	1970.63	1916.06	1824.44	2059.74	2413.81		1444.08	1742.8	1688.57	1687.7	1903.56	1695.97	1524.31	2018.58

## Sheet: WAVE 2 Latency
d28	wave 2 Latency(ms)-click
	stimulus level(dB)	control								saline								fasudil 10mg/kg									fasudil 20mg/kg
	50	2.257	2.537	2.422	2.668	2.504	2.381	2.34		2.832	2.463	2.545	2.422	2.545	2.052	2.216		2.308	2.619	2.226	2.473	2.596	2.637	2.432	2.332		2.401	2.483	2.501	2.688	2.618	2.524	2.236	2.277
	60	2.216	2.405	2.381	2.586	2.422	2.298	2.257		2.75	2.422	2.463	2.422	2.422	2.011	2.093		2.267	2.578	2.126	2.391	2.514	2.506	2.35	2.308		2.377	2.442	2.36	2.524	2.577	2.483	2.313	2.215
	70	2.175	2.355	2.34	2.545	2.422	2.216	2.216		2.75	2.422	2.463	2.34	2.422	1.97	2.011		2.185	2.537	2.144	2.391	2.473	2.514	2.308	2.226		2.36	2.411	2.336	2.36	2.477	2.442	2.281	2.205
	80	2.134	2.314	2.34	2.504	2.422	2.052	2.175		2.627	2.34	2.463	2.34	2.34	1.97	1.97		2.103	2.514	2.103	2.308	2.432	2.391	2.218	2.226		2.318	2.401	2.317	2.317	2.395	2.318	2.213	2.154
	90	2.052	2.232	2.298	2.422	2.316	2.011	2.129		2.586	2.298	2.381	2.298	2.157	1.808	1.888		2.062	2.502	1.939	2.205	2.391	2.35	2.203	2.113		2.295	2.318	2.308	2.354	2.354	1.99	2.167	2.131
	wave 2 Latency(ms)-tone of 16 kHz
	stimulus level(dB)	control								saline								fasudil 10mg/kg									fasudil 20mg/kg
	50	2.366	2.55	2.636	2.506	2.463	2.506	2.722		2.5	2.584	2.457	2.414	2.457	2.669	2.5		/	/	/	/	/	/	/	/		/	/	/	/	/	/	/	/
	60	2.16	2.42	2.506	2.42	2.376	2.376	2.636		2.372	2.457	2.372	2.33	2.33	2.584	2.372		/	3.16	3.571	3.366	3.981	/	3.571	3.407		3.119	/	/	/	4.31	/	3.325	3.242
	70	1.973	2.376	2.42	2.376	2.247	2.247	2.506		2.33	2.372	2.33	2.203	2.203	2.457	2.33		2.709	2.75	3.407	3.119	3.817	4.104	3.53	3.407		2.996	4.433	4.145	4.515	3.981	4.022	2.914	3.037
	80	1.832	2.247	2.376	2.333	2.197	2.117	2.42		2.203	2.33	2.288	2.075	2.075	2.372	2.245		2.586	2.298	3.037	2.873	3.53	3.735	3.119	3.078		2.668	3.94	3.899	3.981	3.817	3.571	2.627	3.037
	90	1.709	2.117	2.247	2.187	2.031	2.117	2.333		2.075	2.203	2.075	1.991	2.075	2.288	2.118		2.463	2.216	2.996	2.586	3.366	3.448	3.037	2.955		2.422	3.53	3.448	3.448	3.53	3.201	2.586	2.791

## Sheet: WAVE 2 Amplitude
d28	wave 2 Amplitude(nV)-click
	stimulus level(dB)	control								saline								fasudil 10mg/kg									fasudil 20mg/kg
	50	2223.42	2995.24	2896.74	3747.93	2366.54	2394.5	2671.24		2895.99	3422.3	2587.26	2832.87	2646.33	2575.98	2174.75		1784.45	1320.79	1862.58	2590.41	1640.56	2747.41	2225.91	1765.14		1482.48	1761.12	1425.38	2459.95	986.548	1358.72	1278.65	468.027
	60	2327.74	3062.62	3199.33	3831.54	3910.47	3426.87	2866.14		3010.03	3785.32	3612.53	3010.42	3251.16	3553.08	4009.11		2569.41	1752.2	2586.87	2988.53	1839.47	3794.64	2807.62	3373.35		1915.56	2037.89	1474.93	2670.84	1048.19	1829.67	1455.07	1415.9
	70	2329.79	3721.54	3868.29	4312.6	4919.05	3690.6	2993.91		3052.22	3860.83	4249.14	3039.45	3528.09	3771.33	4059.97		2907.82	1886.71	2995.94	3268.13	1897.31	4797.39	3100.99	3451.75		1945	2128.38	1506.71	3080.15	1960.69	1956.69	2727.52	2629.51
	80	2936.45	3809.84	4214.44	4393.44	5251.81	4891.66	4665.04		3444.48	4184.84	4957.51	3248.31	4630.81	4189.52	5938.01		3132.14	2747.88	3468.49	4616.62	2020.98	4150.65	3306.82	3787.11		2181.88	2283.7	1565.93	3257.6	2296.05	2198.48	2786.75	3146.71
	90	3288.54	5428.92	5406.08	5150.43	6589.59	4897.66	4931.73		3878.63	4196.98	5223.94	3570.54	5744.16	5330.47	6864.28		3161.51	2914.14	3932.01	4642.97	2076.38	5413.15	4329.21	3800.6		2484.33	2649.38	1783.71	3430.43	2770.85	2452.35	3425.27	3505.69
	wave 2 Amplitude(nV)-tone of 16 kHz
	stimulus level(dB)	control								saline								fasudil 10mg/kg									fasudil 20mg/kg
	50	1446.32	1306.29	1212.68	1144.45	1187.4	1293.88	1517.92		1222.32	1145.41	1562.57	1488.86	1239.29	1344.71	1178.11		/	/	/	/	/	/	/	/		/	/	/	/	/	/	/	/
	60	1510.44	1388.12	1212.85	1232.35	1286.66	1308.53	1589.91		1324.5	1248.52	1636.68	1554.86	1347.02	1428.95	1268.59		/	984.248	520.278	486.897	605.525	/	744.529	417.604		422.23	/	/	/	285.738	/	310.924	808.77
	70	1559.26	1559.25	1275.37	1359.63	1419.03	1496.04	1725.46		1460.77	1312.88	1776.21	1605.12	1540.04	1605.11	1399.62		1420.25	1022.32	535.185	891.114	925.751	478.508	843.673	818.535		487.336	802.875	619.724	525.344	561.689	552.433	433.803	1316.85
	80	1653.96	1655.56	1521.89	1723.32	1489.5	1694.94	1734.29		1533.31	1566.65	1785.3	1702.61	1744.79	1704.26	1774.01		1838.52	1188.09	840.128	1064.22	949.786	1221.98	922.76	1232.76		717.69	1252.11	897.149	769.314	860.935	879.592	641.297	1517.68
	90	1806.56	1834.45	1739.56	1860.05	1851.27	2009.92	1798.73		1905.72	1790.72	1851.63	1859.69	2069.03	1888.41	1914.75		2085.81	1259.11	1227.31	1631.42	1156.82	1830.41	1011.56	1442.05		970.934	1577.56	1242.99	987.48	1022.03	983.521	1000.31	1537.2
