# Supplementary material for: Repressor element 1-silencing transcription factor deficiency yields profound hearing loss through Kv7.4 channel upsurge in auditory neurons and hair cells
Source: eLife journal article supplement (doi:10.7554/elife.76754), 2022-09-20
Supplement: fig7-figsupp2-data1 [file Figure_7_supplement_figure_2B E F_source_data.xlsx]

## Sheet: Figure 7B
	apex					middle					base								Figure 7-figure supplement 2. Fasudil did not alter the morphometry of SGNs and HCs
	number	area(μm²)	10000μm²	SGN/10000μm²		number	area(μm²)	10000μm²	SGN/10000μm²		number	area(μm²)	10000μm²	SGN/10000μm²					B, Quantification of SGNs in the apical, middle, and basal regions of the cochlea of the different groups.
wt-1	79	11110.9	1.11109	71.1017		78	9785.92	0.978592	79.7064		50	7038.93	0.703893	71.0335
wt-2	70	10285.9	1.02859	68.0547		70	9198.06	0.919806	76.103		51	6856.65	0.685665	74.3803
wt-3	69	9729.62	0.972962	70.9175		67	9562.28	0.956228	70.067		46	6430.64	0.643064	71.5325
wt-4	70	9476.04	0.947604	73.8705		71	9908.71	0.990871	71.6541		41	5793.55	0.579355	70.7684
con-1	76	11464.1	1.14641	66.2938		70	9634.52	0.963452	72.6554		51	7033.35	0.703335	72.5117
con-2	83	13386.6	1.33866	62.0024		69	9885.51	0.988551	69.7991		49	7308.01	0.730801	67.0497
con-3	89	12077.9	1.20779	73.6881		77	10292.3	1.02923	74.8131		55	7472.19	0.747219	73.6063
con-4	72	10040.3	1.00403	71.7111		75	10627	1.06271	70.5746		55	7753.67	0.775367	70.9342
con-5	81	11641.4	1.16414	69.5794		76	10957.2	1.09572	69.3607		52	7423.07	0.742307	70.0519
Fasudil 10mg/kg-1	79	11913.3	1.19133	66.3124		79	9751.2	0.97512	81.0157		52	7098.59	0.709859	73.254
Fasudil 10mg/kg-2	79	10672	1.0672	74.0254		69	9757.25	0.975725	70.7166		50	7030.73	0.703073	71.1164
Fasudil 10mg/kg-3	76	11986.6	1.19866	63.4041		68	9862.18	0.986218	68.9503		46	6315.86	0.631586	72.8325
Fasudil 10mg/kg-4	76	10356.2	1.03562	73.3857		70	9821.55	0.982155	71.2718		54	7505.48	0.750548	71.9474
Fasudil 10mg/kg-5	82	11762.1	1.17621	69.7154		70	9371.53	0.937153	74.6943		47	6780.24	0.678024	69.3191
Fasudil 20mg/kg-1	74	10980.9	1.09808	67.39		67	9047.75	0.904775	74.0516		53	7459.02	0.745902	71.0549
Fasudil 20mg/kg-2	71	11877.4	1.18774	59.7773		68	9321.5	0.93215	72.9496		50	7952.85	0.795285	62.8705
Fasudil 20mg/kg-3	67	9132.55	0.913255	73.364		65	8555.43	0.855543	75.9751		52	6782.26	0.678226	76.6706
Fasudil 20mg/kg-4	81	10914.9	1.09149	74.2106		70	9128.62	0.912862	76.6819		44	6785.96	0.678596	64.8398
Fasudil 20mg/kg-5	80	11007.2	1.10072	72.68		82	10785.9	1.07858	76.0255		45	6666.77	0.666677	67.499
Fasudil 20mg/kg-6	75	10467.2	1.04672	71.6522		76	10521.6	1.05216	72.2321		51	7543.22	0.754322	67.6104

## Sheet: Figure 7E
IHC (munbers/100um)																	E, F: The IHCs and OHCs were counted at the apex, middle, and base of the cochlea from the control, saline, and fasudil (10 mg/kg, 20 mg/kg) treatment groups, respectively.
Control				Saline				Fasudil 10mg/kg				Fasudil 20mg/kg
apex	middle	base		apex	middle	base		apex	middle	base		apex	middle	base
13	12	13		12	12	12		11	11	12		12	11	12
14	13	12		13	12	12		12	13	13		11	12	11
12	13	12		11	13	11		12	12	12		12	12	12
				13	12	12		11	12	13		12	11	12

## Sheet: Figure 7F
OHC (munbers/100um)																	E, F: The IHCs and OHCs were counted at the apex, middle, and base of the cochlea from the control, saline, and fasudil (10 mg/kg, 20 mg/kg) treatment groups, respectively.
Control				Saline				Fasudil 10mg/kg				Fasudil 20mg/kg
apex	middle	base		apex	middle	base		apex	middle	base		apex	middle	base
43	40	41		41	42	41		41	40	40		40	41	40
42	44	41		42	43	41		41	43	40		40	41	42
40	42	40		41	42	40		42	40	41		42	40	41
				41	42	41		42	41	41		41	40	42
