# Supplementary material for: Repressor element 1-silencing transcription factor deficiency yields profound hearing loss through Kv7.4 channel upsurge in auditory neurons and hair cells
Source: eLife journal article supplement (doi:10.7554/elife.76754), 2022-09-20
Supplement: fig8-data1 [file Fig.8 C.xlsx]

## Sheet: Fig.8 C
Saline																						Figure 8. Kv7 channel blocking rescues hearing of Rest cKO mice
Before	Tone(dB)										After	Tone(dB)										C, ABR thresholds in the saline and XE991 (0.25, 0.5 mg/kg) treatment groups.
	4k	8k	12k	16k	20k	24k	28k	32k				4k	8k	12k	16k	20k	24k	28k	32k
1	70	60	45	55	55	60	75	85			1	65	55	45	55	60	60	75	80
2	65	55	50	50	60	70	85	90			2	65	55	50	45	55	70	85	90
3	55	50	45	45	55	65	75	80			3	60	50	45	40	50	60	70	85
4	60	50	45	40	50	60	75	85			4	65	55	50	45	50	55	70	85
5	60	50	45	45	55	75	80	85			5	55	50	45	45	55	80	85	85
XE991 0.25mg/kg
Before	Tone(dB)										After	Tone(dB)
	4k	8k	12k	16k	20k	24k	28k	32k				4k	8k	12k	16k	20k	24k	28k	32k
1	65	55	45	40	55	60	70	80			1	45	35	30	30	35	40	50	60
2	60	55	45	40	50	55	70	85			2	50	45	40	35	45	55	65	75
3	70	60	50	45	60	75	90	90			3	50	40	35	40	50	60	75	80
4	60	50	40	40	50	65	75	85			4	45	40	35	40	45	55	60	65
5	60	55	50	45	50	60	70	80			5	50	40	35	40	45	50	60	70
6	55	50	45	45	55	60	80	85			6	55	45	35	40	50	55	65	75
7	55	50	40	40	45	60	80	85			7	50	40	30	35	40	45	55	65
8	65	55	45	40	45	55	75	85			8	50	45	35	40	45	50	60	75
XE991 0.5mg/kg
Before	Tone(dB)										After	Tone(dB)
	4k	8k	12k	16k	20k	24k	28k	32k				4k	8k	12k	16k	20k	24k	28k	32k
1	65	50	45	50	60	70	80	90			1	50	45	40	45	55	65	70	80
2	70	55	45	45	50	60	80	90			2	50	40	35	35	45	60	80	85
3	65	55	40	35	45	60	75	85			3	60	50	45	50	55	65	80	85
4	60	50	45	40	50	60	70	85			4	55	45	40	40	60	70	80	90
5	60	50	45	40	45	60	80	85			5	55	50	50	45	50	65	80	90
6	60	55	45	45	50	65	75	80			6	60	50	45	45	55	60	80	85
7	60	55	45	40	60	75	85	90			7	55	50	45	50	65	80	90	90
