# Supplementary material for: Repressor element 1-silencing transcription factor deficiency yields profound hearing loss through Kv7.4 channel upsurge in auditory neurons and hair cells
Source: eLife journal article supplement (doi:10.7554/elife.76754), 2022-09-20
Supplement: fig8-figsupp1-data1 [file Figure_8-figure_supplement_1.xlsx]

## Sheet: WAVE 1 Latency
	wave 1 latency(ms)-click											wave 1 latency(ms)-click										Figure 8-figure supplement 1
0.25mg/kg XE991	dB	Before									0.5mg/kg XE991	dB	Before									Amplitudes and latencies of ABR waves Ⅰ and Ⅱ in saline and XE991-treated mice
	50	1.272	1.56	1.272	1.372	1.354	1.324	1.231	1.272			50	1.231	1.478	1.272	1.56	1.642	1.331	1.231
	60	1.231	1.519	1.231	1.272	1.313	1.29	1.19	1.272			60	1.149	1.313	1.272	1.519	1.601	1.296	1.231
	70	1.149	1.519	1.19	1.231	1.272	1.149	1.149	1.272			70	1.108	1.231	1.231	1.478	1.46	1.149	1.067
	80	1.067	1.478	1.149	1.149	1.19	1.097	1.067	1.149			80	1.026	1.19	1.19	1.278	1.201	1.108	1.067
	90	1.026	1.437	1.067	1.108	1.149	1.067	1.026	1.108			90	1.026	1.149	1.149	1.137	1.16	1.067	1.026
	dB	After										dB	After
	50	1.272	1.067	1.19	1.149	1.231	1.231	1.149	1.19			50	1.313	1.313	1.231	1.313	1.572	1.631	1.354
	60	1.231	1.067	1.149	1.149	1.231	1.19	1.149	1.108			60	1.231	1.272	1.149	1.272	1.431	1.59	1.272
	70	1.149	1.067	1.19	1.108	1.19	1.149	1.149	1.067			70	1.149	1.231	1.108	1.19	1.349	1.491	1.231
	80	1.067	0.944	1.108	1.067	1.149	1.026	1.067	1.026			80	1.108	1.149	1.067	1.149	1.267	1.167	1.149
	90	1.026	0.944	1.067	1.026	1.067	0.985	1.026	0.985			90	1.026	1.067	1.026	1.067	1.185	1.026	1.108
	wave 1 latency(ms)-16k Hz											wave 1 latency(ms)-16k Hz
0.25mg/kg XE991	dB	Before									0.5mg/kg XE991	dB	Before
	50	1.806	2.134	2.07	2.052	2.134	2.011	1.988	2.052			50	1.765	1.806	1.888	2.161	1.983	1.942	2.511
	60	1.724	1.929	1.97	2.011	2.093	1.97	1.888	1.888			60	1.601	1.765	1.806	2.042	1.724	1.819	1.965
	70	1.683	1.806	1.806	1.806	1.929	1.847	1.683	1.765			70	1.56	1.642	1.783	1.872	1.554	1.5619	1.824
	80	1.601	1.765	1.601	1.642	1.765	1.601	1.519	1.601			80	1.478	1.601	1.66	1.678	1.433	1.472	1.56
	90	1.478	1.683	1.519	1.56	1.601	1.519	1.354	1.519			90	1.437	1.478	1.519	1.437	1.313	1.437	1.437
	dB	After										dB	After
	50	1.647	1.724	1.651	1.765	1.888	1.888	1.683	1.824			50	1.97	1.847	2.093	2.175	1.929	1.97	2.581
	60	1.601	1.642	1.601	1.56	1.683	1.642	1.519	1.724			60	1.888	1.806	1.642	2.134	1.765	1.765	1.994
	70	1.395	1.542	1.437	1.56	1.56	1.56	1.478	1.601			70	1.765	1.765	1.765	1.806	1.437	1.724	1.885
	80	1.354	1.478	1.417	1.478	1.519	1.478	1.378	1.56			80	1.56	1.56	1.395	1.601	1.272	1.519	1.847
	90	1.215	1.237	1.395	1.313	1.409	1.395	1.313	1.437			90	1.56	1.56	1.395	1.56	1.354	1.437	1.76

## Sheet: WAVE 1 Amplitude
	wave 1 amplitude(nV)-click											wave 1 amplitude(nV)-click
0.25mg/kg XE991	dB	Before									0.5mg/kg XE991	dB	Before
	50	1510.43	1223.09	4119.13	3040.57	3042.95	3165.32	4329.73	4324.68			50	1733.06	2090.76	4243.7	3002.83	3989.96	3944.11	1900.12
	60	1532.26	1426.28	4445.33	3108.77	3433.18	4025.44	4347.72	4404.34			60	1822.05	2708.59	5420.22	3134.2	4246.19	4261.61	1945.98
	70	1602.23	1624.96	4731.8	3872.93	4151.23	5099.67	4369.16	4731.89			70	2887.27	3338.49	5449.51	3237.22	4582.91	4502.49	2442.3
	80	1880.65	1707.56	4988	4471.36	4487.6	5630.42	5561.84	4773.99			80	3152.53	3823.64	5931.92	4328.57	5009.53	5019.87	2509.11
	90	1939.82	1826.75	5450.58	5021.78	4727.02	6011.33	5591.32	5130.92			90	3208.24	4707.87	6199.38	4449.66	5064.19	5123.35	2681.51
	dB	After										dB	After
	50	1566.31	1984.55	4172.47	3181.42	3254.21	3202.7	4333.55	4474.85			50	1742.91	2167.53	3929.88	3049.93	3719.4	4532.56	1786.6
	60	1578.87	2008.05	4479.58	3333.26	3572.4	4045.26	4375.88	4409.72			60	1844.86	2723.31	5251	3260.9	4136.89	4201.48	1838.56
	70	1596.32	2256.06	4820.78	3999.48	4193.92	5168.04	4378.58	4784.37			70	2820.1	3407.44	5358.18	3469.17	4330.19	4558.38	1993.99
	80	1819.57	2806.88	4939.9	4895.87	4567.67	5665.12	5576.98	4729.75			80	3159.97	3869.37	6064.88	4429.76	4937.41	5298.26	2037.59
	90	2079.11	3132.03	5431.94	5560.37	4988.44	6047.87	5610.4	5141.3			90	3269.95	4741.48	6117.51	4752.93	5014.11	5353.33	2073.05
	wave 1 amplitude(nV)-16k Hz											wave 1 amplitude(nV)-16k Hz
0.25mg/kg XE991	dB	Before									0.5mg/kg XE991	dB	Before
	50	148.639	139.773	349.487	384.339	532.223	508.164	211.909	280.168			50	296.834	452.682	585.75	188.203	369.632	409.056	319.357
	60	355.834	354.735	449.413	411.939	868.906	897.021	323.346	540.347			60	696.629	606.286	687.262	506.541	630.879	583.852	453.951
	70	548.639	638.937	579.621	806.948	1013.04	833.229	713.785	879.308			70	700.482	523.735	871.481	877.344	948.796	955.184	733.697
	80	675.973	829.307	876.453	1039.92	1131.16	1176.97	663.764	974.2			80	827.116	707.412	924.48	1092.18	1262.31	1270.7	1037.42
	90	948.896	1035.35	1038.62	1090.88	1368.4	1617.19	930.659	1270.37			90	978.881	947.622	1015.24	1146.7	1401.38	1667.49	1271.41
	dB	After										dB	After
	50	261.928	188.055	496.284	472.468	607.904	544.467	369.73	393.044			50	220.437	467.156	595.647	317.784	219.821	418.856	113.822
	60	609.009	495.219	501.001	605.712	914.78	833.229	547.368	624.027			60	557.904	670.755	673.889	572.958	449.039	591.382	196.245
	70	989.6	979.461	705.712	1098.48	1295.32	916.149	1047.37	1124.03			70	622.608	543.56	845.526	827.245	782.936	1054.15	539.407
	80	1089.6	1099.47	956.948	1193.64	1323.1	1347.38	1215.75	1262.57			80	829.691	718.658	802.937	912.533	1008.85	1324.4	932.026
	90	1258.17	1311.92	1439.26	1530.05	1697.27	1876.44	1408.49	1434.08			90	906.293	836.885	920.751	1629.33	1160.17	1601.89	1062.33

## Sheet: WAVE 2 Latency
	wave 2 latency(ms)-click											wave 2 latency(ms)-click
0.25mg/kg XE991	dB	Before									0.5mg/kg XE991	dB	Before
	50	2.093	2.093	2.052	2.175	2.216	2.134	2.052	2.134			50	1.765	2.216	2.093	2.052	2.232	1.929	1.742
	60	2.011	2.093	2.011	2.134	2.216	2.093	2.011	2.093			60	1.683	2.134	2.052	2.011	2.091	1.888	1.691
	70	1.97	2.052	2.011	2.093	2.175	2.093	2.011	2.093			70	1.742	2.093	2.011	1.97	2.091	1.888	1.66
	80	1.888	2.011	1.97	2.093	2.175	2.052	2.011	2.011			80	1.642	1.893	2.052	1.97	1.873	1.847	1.56
	90	1.806	1.929	1.929	2.052	2.134	1.888	1.97	1.929			90	1.601	1.56	1.97	1.888	1.799	1.806	1.519
	dB	After										dB	After
	50	1.724	1.678	2.011	1.97	2.052	1.97	1.97	2.011			50	2.093	2.052	2.011	2.093	1.765	1.97	2.093
	60	1.683	1.578	1.929	1.888	2.011	1.929	1.929	1.97			60	2.011	2.011	1.97	2.052	1.642	1.929	2.011
	70	1.583	1.437	1.97	1.888	2.011	1.929	1.97	2.011			70	1.97	1.97	1.87	1.97	1.97	1.888	1.97
	80	1.442	1.395	1.888	1.847	1.97	1.847	1.929	1.478			80	1.888	1.929	1.868	1.97	1.56	1.847	1.929
	90	1.342	1.354	1.847	1.806	1.888	1.765	1.888	1.437			90	1.765	1.888	1.806	1.888	1.56	1.806	1.847
	wave 2 latency(ms)-16k Hz											wave 2 latency(ms)-16k Hz
0.25mg/kg XE991	dB	Before									0.5mg/kg XE991	dB	Before
	50	2.873	3.284	3.037	3.242	3.284	3.078	2.873	3.119			50	2.832	2.791	2.955	2.668	2.709	2.504	2.955
	60	2.422	3.037	2.791	2.914	3.242	3.078	2.873	2.955			60	2.422	2.832	2.955	2.709	2.627	2.381	2.709
	70	2.75	2.791	2.996	3.119	3.037	2.873	2.627	2.75			70	2.75	2.545	2.627	2.463	2.422	2.216	2.709
	80	2.668	2.545	2.586	2.709	2.832	2.627	2.381	2.586			80	2.381	2.627	2.791	2.381	2.175	2.298	2.422
	90	2.422	2.668	2.422	2.627	2.504	2.545	2.422	2.463			90	2.504	2.545	2.504	2.422	1.806	2.257	2.298
	dB	After										dB	After
	50	2.832	2.996	2.586	2.791	3.037	2.873	2.668	2.809			50	3.489	2.75	3.078	3.201	2.873	3.119	3.612
	60	2.586	2.709	2.545	2.586	2.709	2.586	2.545	2.709			60	2.996	2.709	2.627	3.16	2.791	2.75	2.627
	70	2.404	2.586	2.481	2.504	2.627	2.586	2.422	2.504			70	2.832	2.545	2.627	2.832	2.586	2.668	2.381
	80	2.304	2.504	2.349	2.439	2.545	2.545	2.381	2.504			80	2.545	2.381	2.134	2.586	2.422	2.381	2.873
	90	2.052	2.257	2.34	2.404	2.422	2.545	2.216	2.381			90	2.422	2.381	1.929	2.586	2.257	2.257	2.422

## Sheet: WAVE 2 Amplitude
	wave 2 amplitude(nV)-click											wave 2 amplitude(nV)-click
0.25mg/kg XE991	dB	Before									0.5mg/kg XE991	dB	Before
	50	1823.71	2103.01	3151.84	3290.43	4203.6	2761.49	1907.44	2192.24			50	2540.52	1340.41	3476.7	1803.32	1038.47	1257.03	3925.68
	60	1907.48	2430.75	4198.99	3598.65	4983.52	2918.9	2106.61	2783.29			60	3581.93	2578.23	4109.21	1856.22	1246.32	2305.68	3999.93
	70	2582.79	3426.93	4280.53	5413.56	5032.34	3884.61	2833.21	3796.73			70	3901.74	3625.22	4171.46	2880.77	3502.22	3510.46	4622.64
	80	2734.2	3502.82	4414.12	5554.34	5082.36	5056.39	3110.29	4254.09			80	4444.36	3701.48	5038.97	3146.16	3515.52	3676.44	5137.32
	90	3241.26	3515.17	4898.1	6393.57	5185.93	5833.52	4266.36	4702.99			90	4892.75	4678.52	5343.36	2937.85	3659.78	3978.17	6445.39
	dB	After										dB	After
	50	2946.55	3026.96	3680.66	3412.6	5214.3	3491.76	1940.02	2858.51			50	2224.73	1457.14	2987.44	1515.78	1772.54	2826.97	2992.9
	60	3083.31	3597.17	4160.02	3874.47	5324.96	3648.24	2178.72	3041.13			60	2346.48	2680.21	3478.11	2053.05	2047.11	3642.41	3148.59
	70	3499.42	3765.37	4244.8	5480.13	5767.65	4797.31	2727.23	3101.58			70	3161.68	3384.5	3964.95	2507.11	3244.21	3666.79	3606.3
	80	3532.83	4199.44	4770.06	5940.92	5786.33	4966.03	3617.07	4543.48			80	3692.09	3860.6	4104	3753.46	3356.1	4705.49	4713.41
	90	4085.55	4300.14	4794.08	6999.33	5881.5	4995.65	4957.55	4663.97			90	4046.1	5887.05	4231.83	3831.08	3460.43	5046.77	5872.45
	wave 2 amplitude(nV)-16k Hz											wave 2 amplitude(nV)-16k Hz
0.25mg/kg XE991	dB	Before									0.5mg/kg XE991	dB	Before
	50	526.036	697.011	629.98	406.035	273.561	701.14	787.379	365.005			50	684.89	984.213	626.551	358.901	380.477	679.163	825.814
	60	547.437	509.979	746.141	679.104	640.056	750.322	808.354	560.084			60	784.57	1073.83	682.828	436.637	471.131	947.279	914.475
	70	591.914	1013.21	970.565	1130.96	831.054	1257.69	846.364	908.973			70	996.878	1483.25	875.961	633.932	549.503	960.16	1278.88
	80	803.24	1240.11	1279.19	1178.8	1256.34	2118.92	923.29	1628.08			80	1109.6	1934.67	1185.94	705.606	787.171	978.869	1554.23
	90	1271.39	1466.28	1683.22	1651.77	1237.57	2385.8	1045.24	1681.75			90	1578.23	2036.1	1487.07	793.225	932.068	1059.02	1597.21
	dB	After										dB	After
	50	862.494	1032.57	763.21	836.738	309.977	821.375	828.082	760.663			50	432.35	1551.22	445.826	648.724	379.281	679.348	320.969
	60	920.857	1214.69	842.521	927.356	729.17	729.144	852.085	821.495			60	543.563	1841.41	465.556	842.883	366.108	1283.14	326.787
	70	944.844	1818.19	1000.56	1029.59	957.604	1147.8	869.809	1053.92			70	706.836	1854.12	800.464	846.713	523.463	1352.92	536.647
	80	1333.35	1758.46	1244.75	1152.23	1010.32	1750.54	975.657	1426.95			80	838.293	2313.89	860.051	1236.35	615.732	1392.92	542.597
	90	1345.54	1778.27	1782.62	1842.65	1197.46	2834.74	1026	1545.67			90	1585.9	3476.7	973.738	1591.68	704.238	1585.27	812.427
