# Supplementary material for: Repressor element 1-silencing transcription factor deficiency yields profound hearing loss through Kv7.4 channel upsurge in auditory neurons and hair cells
Source: eLife. 2022 Sep 20;11:e76754. doi: 10.7554/eLife.76754 (PMC9525063; doi:10.7554/eLife.76754)
Supplement: Source data 1. [file elife-76754-data1.docx]

**Supplement**

**Repressor element 1-silencing transcription factor deficiency yields profound hearing loss through Kv7.4 channel upsurge in auditory neurons and hair cells**

Haiwei Zhang1,2,3, Hongchen Li1,2,3, Mingshun Lu1,2,3, Shengnan Wang1,2,3, Xueya Ma 1,2,3, Fei Wang 1,2,3, Jiaxi Liu1,2,3, Xinyu Li1,2,3, Haichao Yang1,2,3, Fan Zhang2,3, Haitao Shen4, Noel J. Buckley5,8, Nikita Gamper1,2,6, Ebenezer N. Yamoah7# and Ping Lv1,2,3,9#

1 Department of Pharmacology, Hebei Medical University, The Key Laboratory of New Drug Pharmacology and Toxicology, Shijiazhuang, Hebei 050017, China

2 Center for Innovative Drug Research and Evaluation, Institute of Medical Science and Health, Hebei Medical University, Shijiazhuang, Hebei Province, China

3 The Key Laboratory of Neural and Vascular Biology, Ministry of Education, Hebei Medical University, Shijiazhuang, Hebei 050017, China

4Lab of Pathology, Hebei Medical University, Shijiazhuang, Hebei 050017, China

5 Department of Psychiatry, University of Oxford, Oxford, United Kingdom

6.Faculty of Biological Sciences, University of Leeds, Leeds, United Kingdom,

7 Department of Physiology and Cell Biology, School of Medicine, University of Nevada, Reno, Reno, NV 89557, United States

8 Kavli Institute for Nanoscience Discovery, University of Oxford, Oxford, United Kingdom

9The Hebei Collaboration Innovation Center for Mechanism, Diagnosis and Treatment of Neurological and Psychiatric Disease, Hebei Medical University, Shijiazhuang, Hebei 050017, China

Number of Figures: 8

Supplementary Figures: 8

Number of supplementary files : 1a,1b,1c

**Corresponding author:**

Ebenezer N. Yamoah

Department of Physiology and Cell Biology, School of Medicine

University of Nevada, Reno,

Reno, NV 89557, United States

E-mail address: enyamoah@gmail.com

Ping Lv

Department of Pharmacology

Hebei Medical University

Shijiazhuang, Hebei 050017, China.

E-mail address: lping77@hotmail.com

**Supplementary File 1a**

The primer sequences for genotyping

| Primer | Sequence(5' - 3') |
| --- | --- |
| Rest forward | GCCCACACGCCAGGCCTGAAC |
| Rest reverse | TCGGTCCCGAGGCTCGAAGTGG |
| Rest DEL forward | GCACAAGCAGCGCACTATTA |
| Rest DEL reverse | CGGGCG GATTAGGTA AGTTT |
| Atoh1 forward | CCGGCAGAGTTTACAGAAGC |
| Atoh1 reverse | ATGTTTAGCTG GCCCAAATG |
| Atoh1 control forward | CTAGGCCACAGAATTGAAAGATCT |
| Atoh1 control reverse | GTAGGTGGAAATTCTAGCATCATCC |

**Supplementary File 1b**

The primer sequences for real-time PCR

| Primer | Sequence(5' - 3') |
| --- | --- |
| Nav1.1 forward | CTCCTCAAATGGGTGGCCTA |
| Nav1.1 reverse | GATTTGATGGCCCCGAGTTC |
| Nav1.6 forward | CCTGGTGTTCACTGGGATCT |
| Nav1.6 reverse | AGGCCCAGCTCCATTAAACT |
| Nav1.7 forward | CGAGAGCGGAGAGATGGATT |
| Nav1.7 reverse | TTCGCTTCAGTGTGGTTGTG |
| Kv3.4 forward | TTCTTTTGCCTGGACACTGC |
| Kv3.4 reverse | GCCACAACGTCGATAATGCT |
| Kv1.1 forward | GGCGAGAGGGGTTTCCAAAT |
| Kv1.1 reverse | GGCTTCAGAGCCAGAAGGTT |
| Kv1.2 forward | GGAGGCTCTGGTACCCATCT |
| Kv1.2 reverse | CCTTTGGAAGGAAGGAGGCA |
| HCN1 forward | ACATGCTGTGCATTGGTTATGGCG |
| HCN1 reverse | AACAAACATTGCGTAGCAGGTGGC |
| HCN2 forward | ACTTCCGCACCGGCATTGTTATTG |
| HCN2 reverse | TCGATTCCCTTCTCCACTATGAGG |
| Kv7.2 forward | AGGAAGCCGTTCTGTGTGAT |
| Kv7.2 reverse | GCAGAGGAAGCCAATGTAC |
| Kv7.3 forward | GAAGACAGGGGCTATGGGAAT |
| Kv7.3 reverse | GTTTTGGAGTGGATGGAGGTC |
| Kv7.4 forward | ATGGGGCGCGTAGTCAAGGT |
| Kv7.4 reverse | GGGCTGTGGTAGTCCGAGGTG |

**Supplementary File 1c**

The primer sequences for single-cell RT-PCR

| Primer | Sequence(5' - 3') |
| --- | --- |
| Primer sequences in Figure 1B  Rest forward | CGACACATGCGGACTCATTC |
| Rest reverse | AGAGGCCACATAATTGCACTG |
| Primer sequences in Figure 1-figure supplement 1  Rest forward  Rest reverse | GGTCTGATCCCGCTCCG  TGGCCATAACTGTACTCCTCTG |
| GAPDH forward | CCAGCCTCGTCCCGTAGACA |
| GAPDH reverse | CTCGTGGTTCACACCCATCA |
