# Supplementary figures and images for: Repressor element 1-silencing transcription factor deficiency yields profound hearing loss through Kv7.4 channel upsurge in auditory neurons and hair cells
Source: eLife journal article supplement (doi:10.7554/elife.76754), 2022-09-20

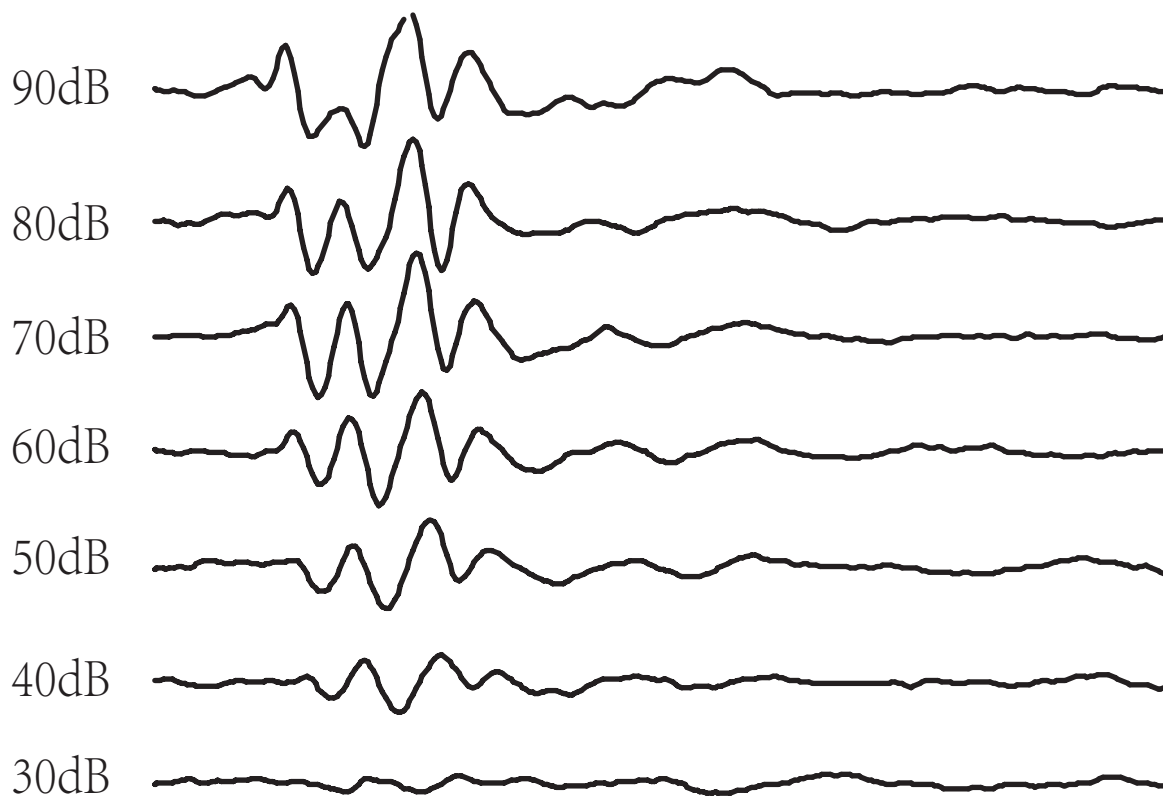

Supplement: fig1-data1 [file elife-76754-fig1-data1-v2.zip]

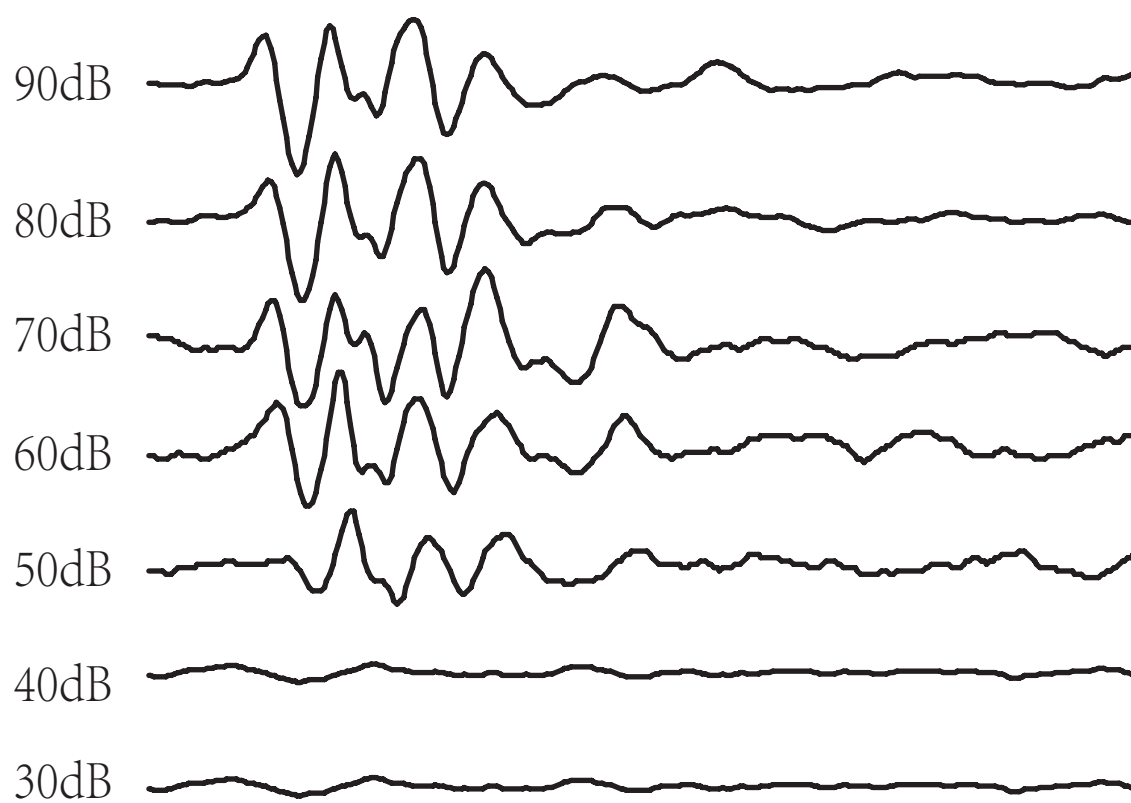

Supplement: fig1-data1 [file elife-76754-fig1-data1-v2.zip]

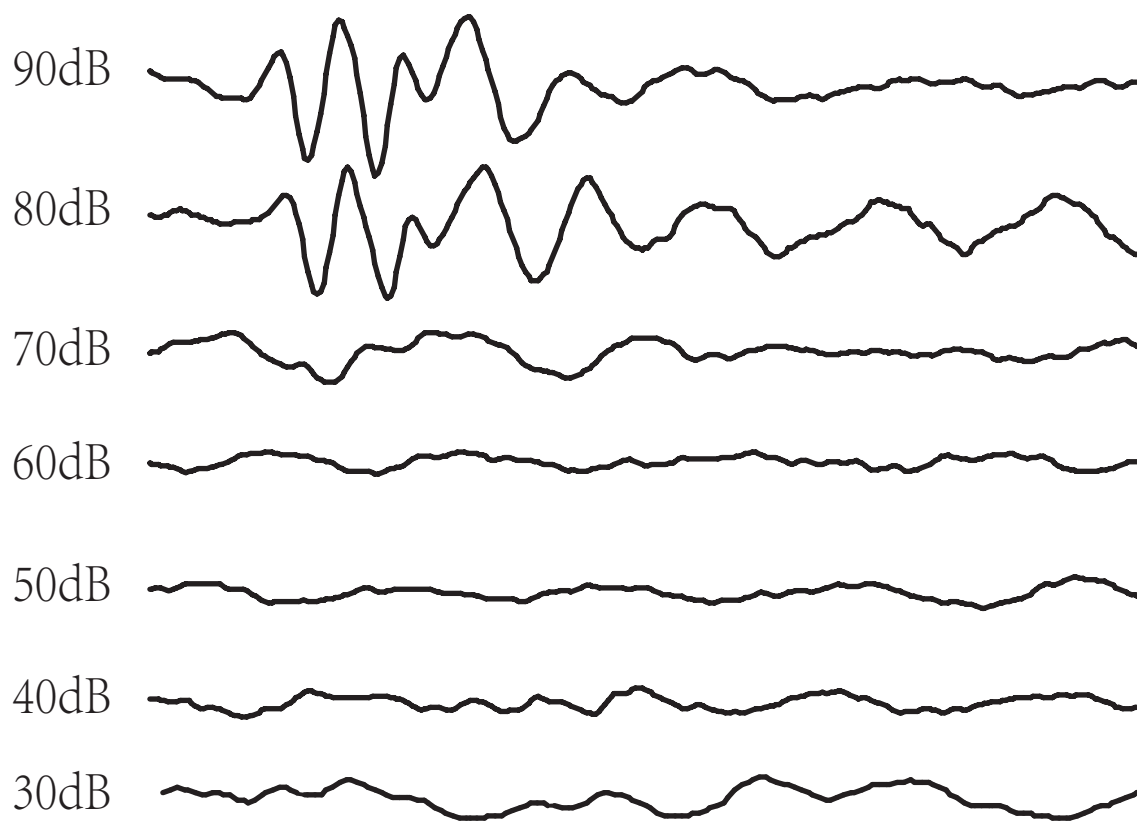

Supplement: fig1-data1 [file elife-76754-fig1-data1-v2.zip]

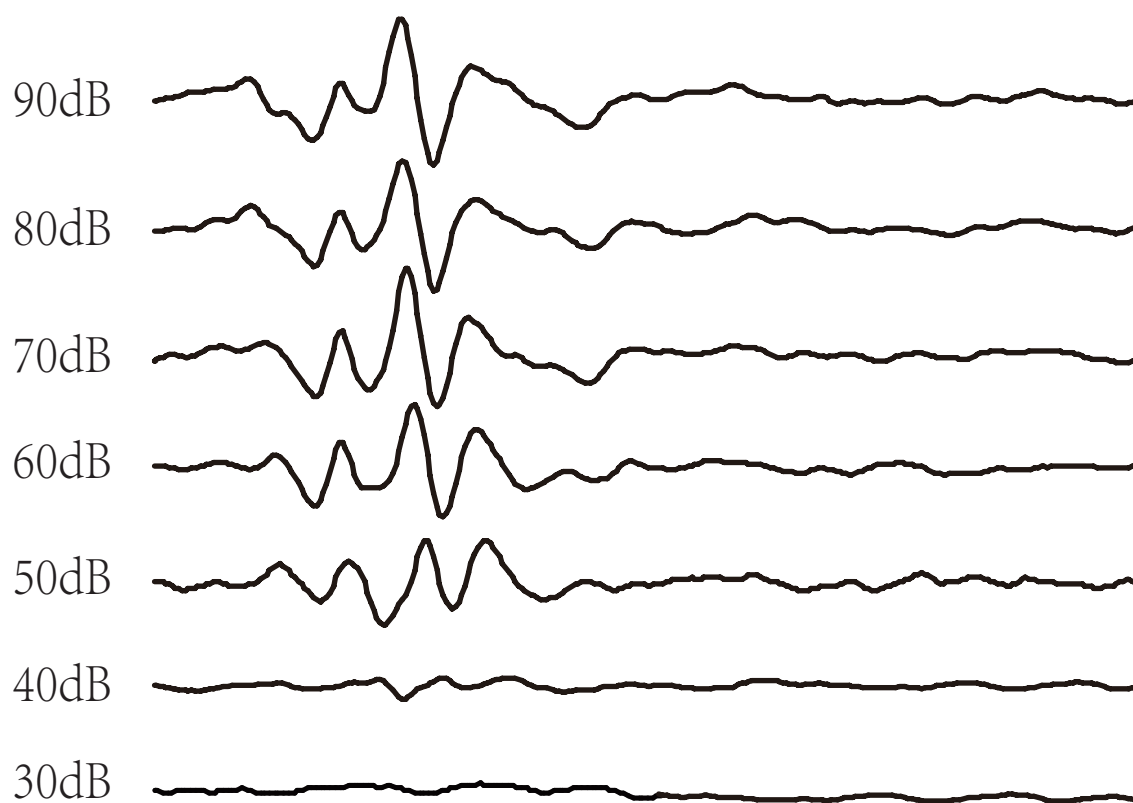

Supplement: fig1-data1 [file elife-76754-fig1-data1-v2.zip]

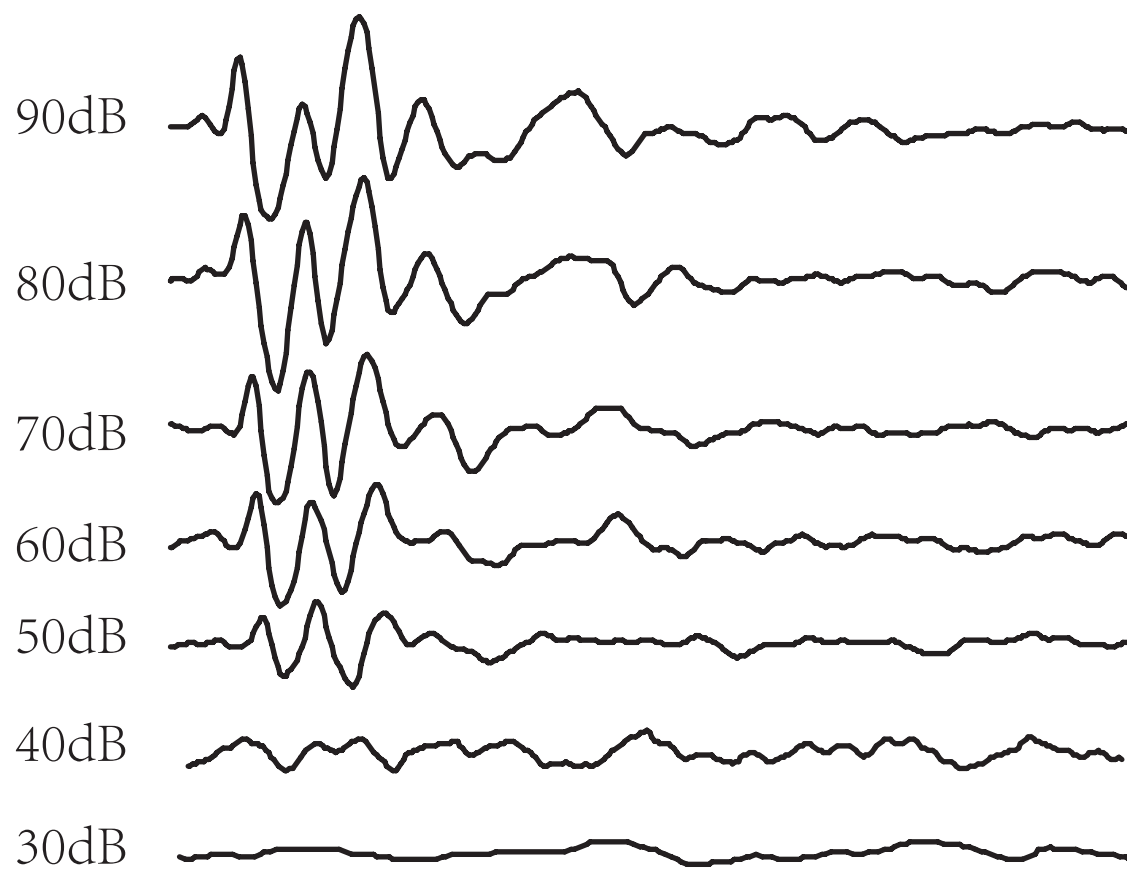

Supplement: fig8-data1 [file Fig.8 B-XE991 0.25mg kg after.pdf › Figure_8-source_data/Fig.8 B/Fig.8 B-XE991 0.25mg kg after.pdf]

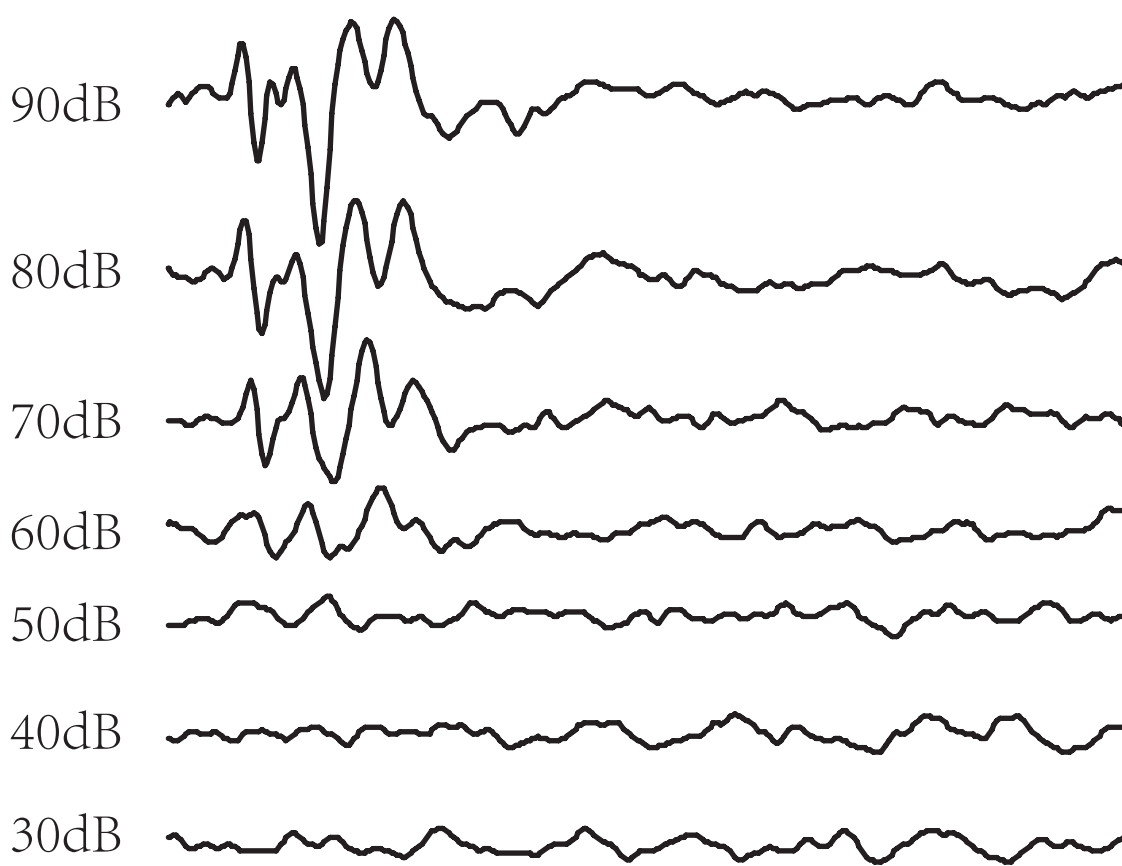

Supplement: fig8-data1 [file Fig.8 B-XE991 0.25mg kg before.pdf › Figure_8-source_data/Fig.8 B/Fig.8 B-XE991 0.25mg kg before.pdf]

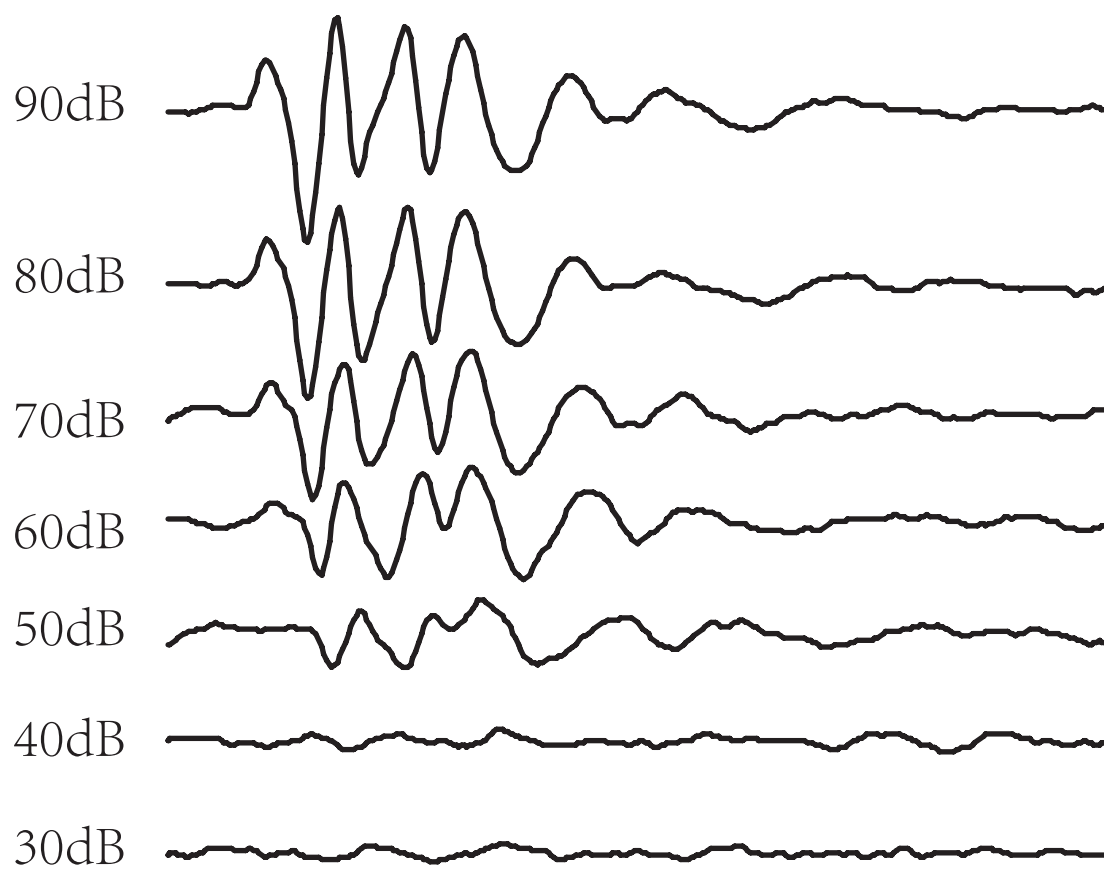

Supplement: fig8-data1 [file Fig.8 B-XE991 0.5mg kg after.pdf › Figure_8-source_data/Fig.8 B/Fig.8 B-XE991 0.5mg kg after.pdf]

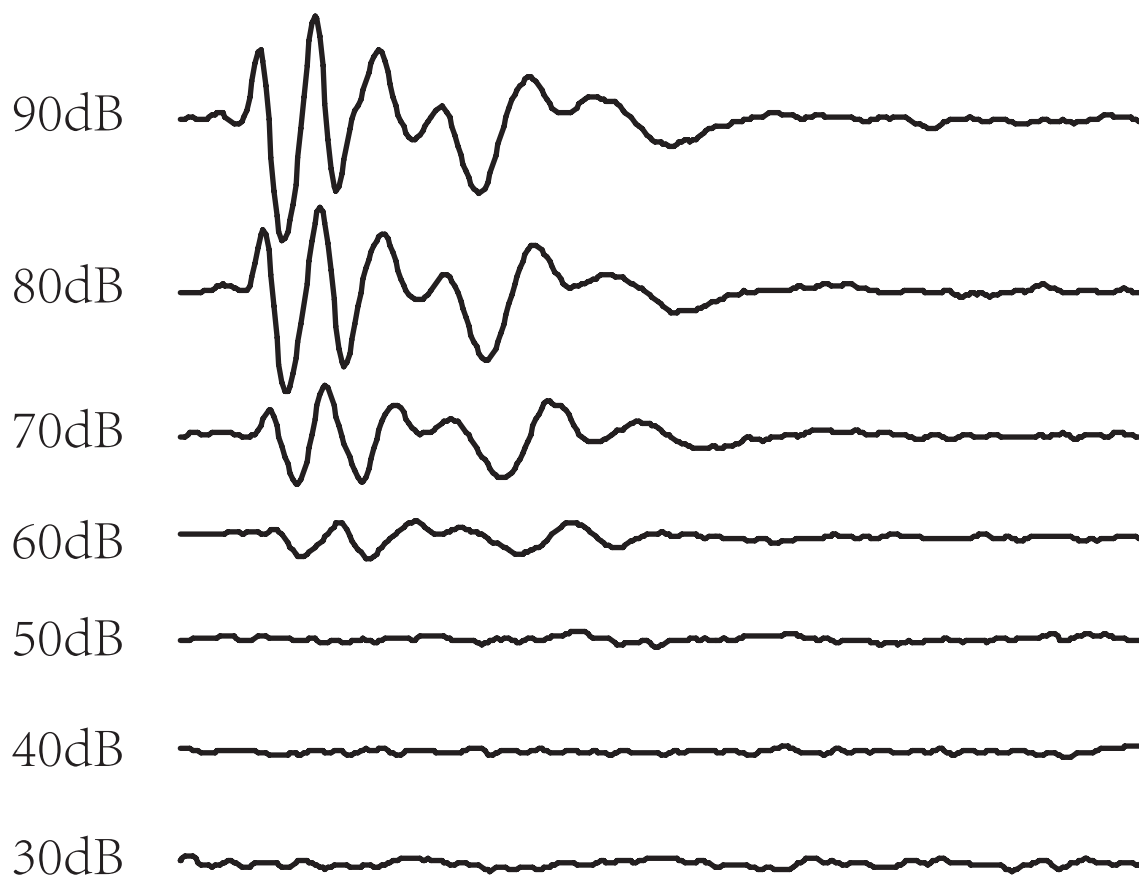

Supplement: fig8-data1 [file Fig.8 B-XE991 0.5mg kg before.pdf › Figure_8-source_data/Fig.8 B/Fig.8 B-XE991 0.5mg kg before.pdf]

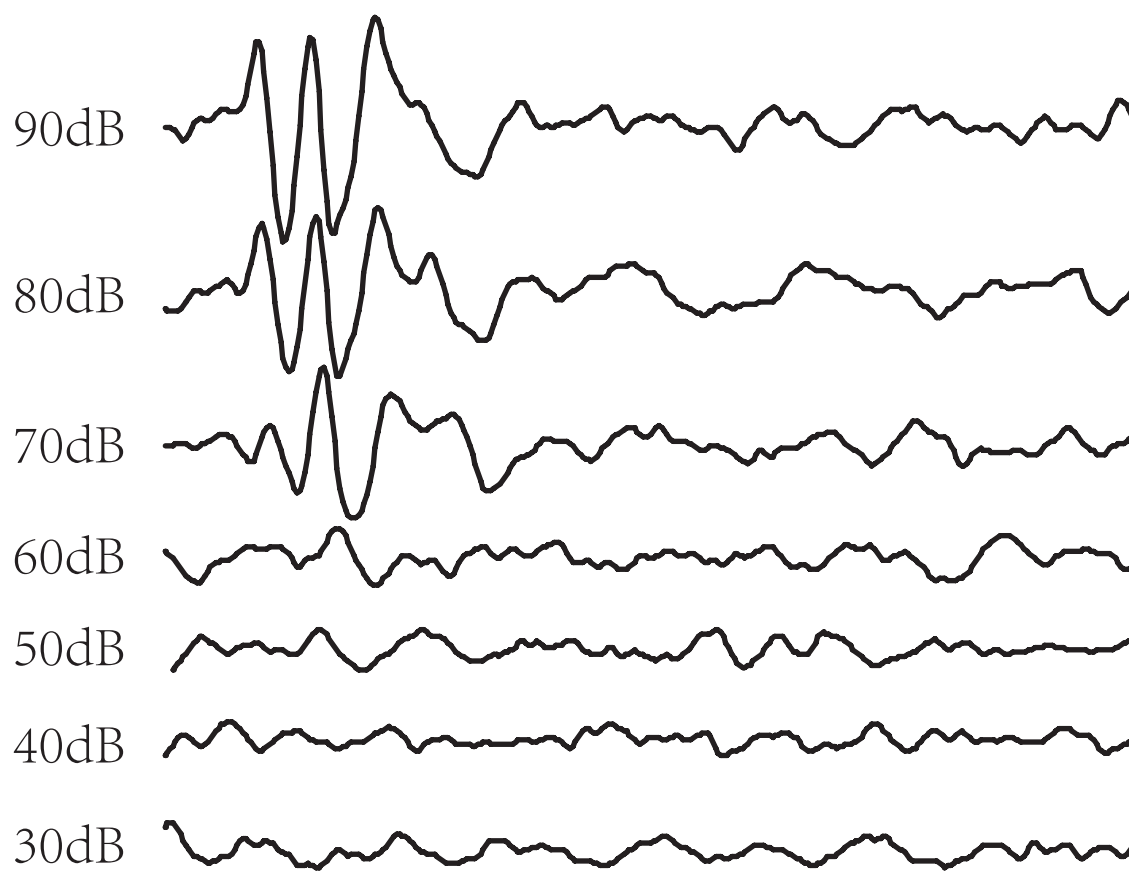

Supplement: fig8-data1 [file Fig.8 B-saline after.pdf › Figure_8-source_data/Fig.8 B/Fig.8 B-saline after.pdf]

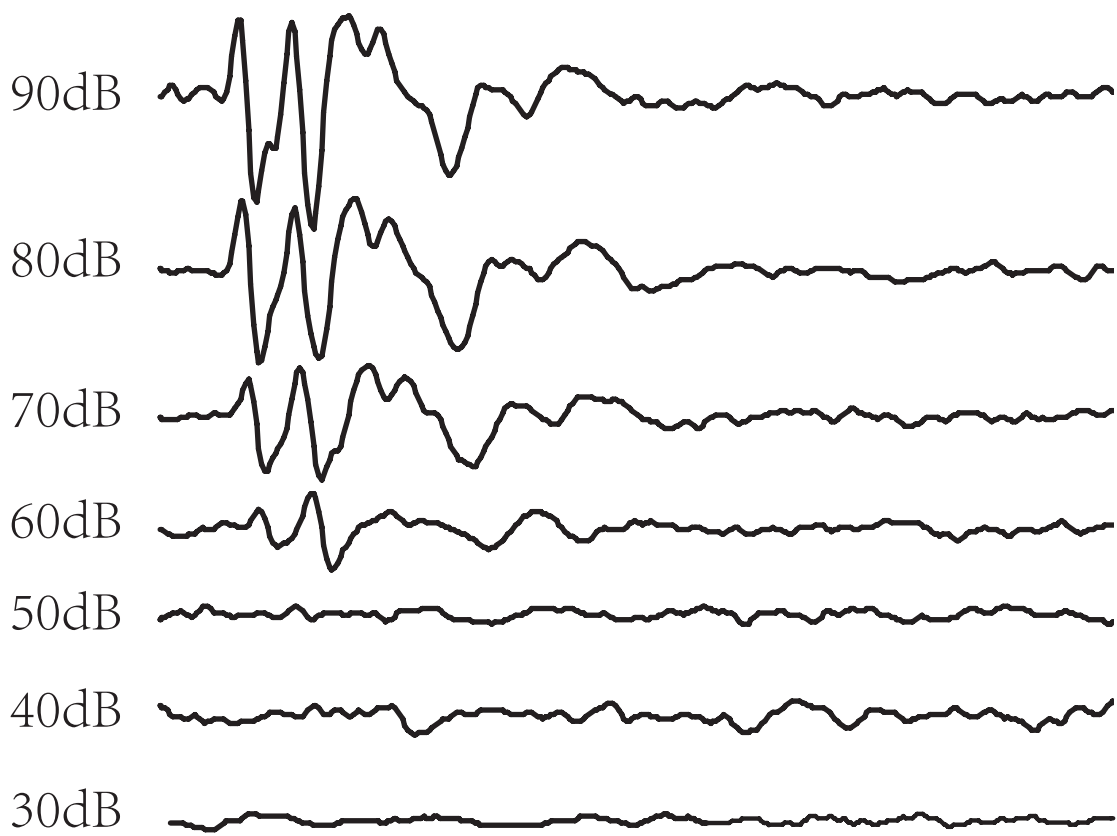

Supplement: fig8-data1 [file Fig.8 B-saline before.pdf › Figure_8-source_data/Fig.8 B/Fig.8 B-saline before.pdf]
